# Supplementary material
Source: publisher figshare collection journal article supplement (https://acs.figshare.com/ndownloader/files/3864334)

**Supporting Online Material for**

**Tandem Synthesis of 3-Halo-5-Substituted Isoxazoles from  
1-Copper(I) Alkynes and Dihaloformaldoximes**

Wenwen Chen, Bo Wang, Nan Liu, Dayun Huang, Xinyan Wang,\* Yuefei Hu\*

*Department of Chemistry, Tsinghua University, Beijing 100084, P. R. China*

wangxinyan@mail.tsinghua.edu.cn and yfh@mail.tsinghua.edu.cn

|    |                                                                                               |         |
|----|-----------------------------------------------------------------------------------------------|---------|
| 1. | Table 2. Effects of the solvents and ligands on the yield of <b>1a</b> .....                  | S2      |
| 2  | Preparation and characterizations of compounds <b>1a-p</b> and <b>2a-p</b> .....              | S2-S19  |
| 3. | References 1-4.....                                                                           | S19     |
| 4. | <sup>1</sup> H and <sup>13</sup> C NMR spectra of compounds <b>1a-p</b> and <b>2a-p</b> ..... | S20-S83 |

**Table 2. Effects of the solvents and ligands on the yield of 1a<sup>a</sup>**

| entry | solvent                              | ligand           | 1a (%) <sup>b</sup> |
|-------|--------------------------------------|------------------|---------------------|
| 1     | ClCH <sub>2</sub> CH <sub>2</sub> Cl | --               | 94                  |
| 2     | CHCl <sub>3</sub>                    | --               | 76                  |
| 3     | PhMe                                 | --               | 74                  |
| 4     | CH <sub>2</sub> Cl <sub>2</sub>      | --               | 70                  |
| 5     | EtOAc                                | --               | 67                  |
| 6     | NMP                                  | --               | 10                  |
| 7     | DMF                                  | --               | 20                  |
| 8     | MeCN                                 | --               | 30                  |
| 9     | THF                                  | --               | 73                  |
| 10    | ClCH <sub>2</sub> CH <sub>2</sub> Cl | 1,10-Phen        | 57                  |
| 11    | ClCH <sub>2</sub> CH <sub>2</sub> Cl | dppf             | 70                  |
| 12    | ClCH <sub>2</sub> CH <sub>2</sub> Cl | dppp             | 73                  |
| 13    | ClCH <sub>2</sub> CH <sub>2</sub> Cl | PPh <sub>3</sub> | 74                  |

<sup>a</sup> The mixture of **3** (0.6 mmol) and **7a** (0.5 mmol) in a solvent (1 mL) was stirred in a stoppered glass tube at 45 °C for 1 h. <sup>b</sup> The isolated yields.

## Experimental Section

All melting points were determined on a Yanaco melting point apparatus and were uncorrected. IR spectra were recorded as KBr pellets on a Nicolet FT-IR 5DX spectrometer. The spectra of <sup>1</sup>H NMR (300 or 400 MHz) and <sup>13</sup>C NMR (75 or 100 MHz) were recorded in CDCl<sub>3</sub>. TMS was used as an internal reference and *J* values are given in Hz. HRMS were obtained on a Bruker micrOTOF-Q II spectrometer. Dibromoformaldoxime (**3**),<sup>1</sup> dichloroformaldoxime (**4**)<sup>1</sup> and 1-copper(I) alkynes (**7a-s**)<sup>2</sup> were prepared by reported references in literature.

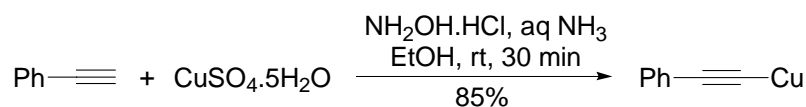

**A typical procedure for the synthesis of copper(I) phenylethyne (7a).**<sup>2c</sup> To a cooled (ice bath) and stirred solution of CuSO<sub>4</sub>·5H<sub>2</sub>O (25 g, 100 mmol), aqueous ammonia (28%, 100 mL) and water (400 mL) is added solid NH<sub>2</sub>OH·HCl (13.9 g, 200 mmol) under N<sub>2</sub>. Ten minutes later, a solution of phenylethyne (10.25 g, 100.5 mmol) in EtOH (95%, 500 mL) was added rapidly. The resultant mixture is stirred for another five min, yellow solid is produced and water (500 mL) is added. After the mixture stands for 5 minute, the solid is collected on a sintered glass filter and washed successively with water (5 x 100 mL), EtOH (5 x 100 mL) and Et<sub>2</sub>O (5 x 100 mL). After the solid is dried in vacuum for 6 h at room temperature, copper(I) phenylethyne (**7a**) was obtained in 85% (14 g) as bright yellow crystals. The sample is stored in a bottle and no notable decomposition is observed within one year.

By the similar procedure, 1-copper(I) alkynes (**7b-s**) were prepared.

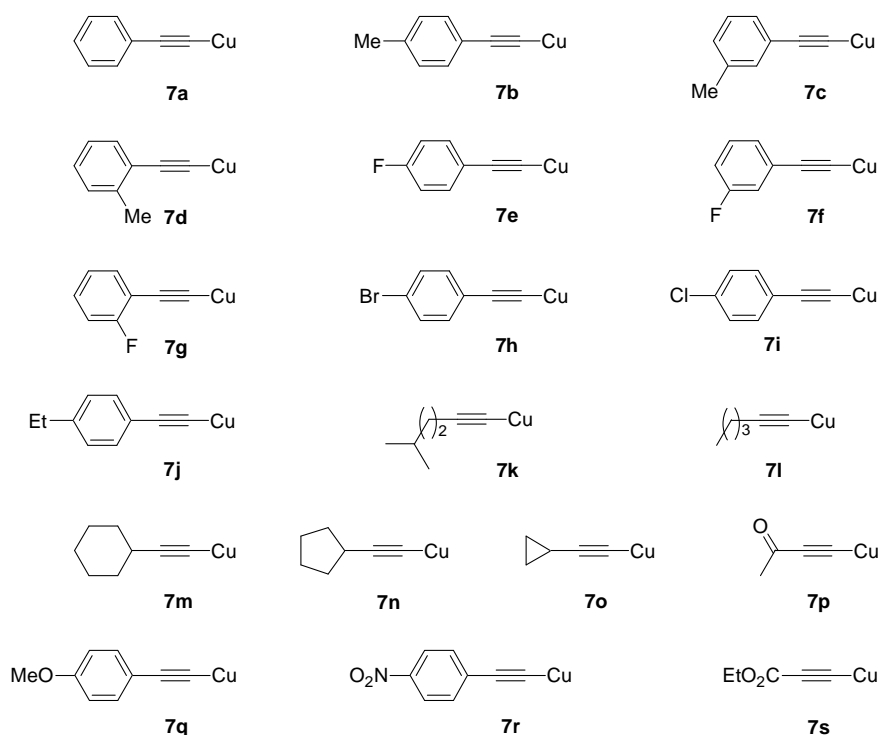

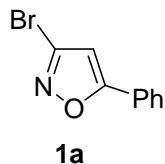

**A typical procedure for the preparation of 3-bromo-5-phenylisoxazole (1a).**

To a suspension of 1-copper(I) phenylethyne (**7a**) (83 mg, 0.5 mmol) in DCE (1 mL) was added dibromoformaldoxime (**3**) (122 mg, 0.6 mmol). After the mixture was stirred at 45 °C (water bath) for 1 h (the end-point was judged by the disappearance of the bright yellow colour of **7a**), it was purified directly by a column chromatography [silica gel, 2% EtOAc in petroleum ether (60–90 °C)] to give 106 mg (94%) of product **1a** as a white solid, mp 70–71 °C (Lit.<sup>3</sup> 72–73 °C. <sup>1</sup>H NMR (400 MHz, CDCl<sub>3</sub>)  $\delta$  7.76–7.74 (m, 2H), 7.49–7.48 (m, 3H), 6.58 (s, 1H); <sup>13</sup>C NMR (100 MHz, CDCl<sub>3</sub>)  $\delta$  171.3, 140.8, 130.9, 129.1 (2C), 126.3, 125.8 (2C), 102.8.

The products **1b-1p** were prepared by the similar procedure.

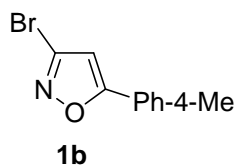

**3-Bromo-5-(4-methylphenyl)isoxazole (1b).** The title compound was prepared by the same procedure as **1a**. After a suspension of 1-copper(I) (4-methylphenyl)ethyne (**7b**) (90 mg, 0.5 mmol) and dibromoformaldoxime (**3**) (122 mg, 0.6 mmol) in DCE (1.0 mL) was stirred at 45 °C for 70 min, the crude product was purified by a column chromatography [silica gel, 2% EtOAc in petroleum ether (60–90 °C)] to give product **1b** as a yellowish solid (107 mg, 90%), mp 61–63 °C. IR  $\nu$  3159, 1612, 1504, 1430 cm<sup>-1</sup>; <sup>1</sup>H NMR (300 MHz, CDCl<sub>3</sub>)  $\delta$  7.63 (d,  $J$  = 8.3 Hz, 2H), 7.28 (d,  $J$  = 7.9 Hz, 2H), 6.52 (s, 1H), 2.41 (s, 3H); <sup>13</sup>C NMR (75 MHz, CDCl<sub>3</sub>)  $\delta$  171.6, 141.4, 140.8, 129.8 (2C), 125.8 (2C), 123.7, 102.3, 21.5. HRMS (ESI-TOF) ( $m/z$ ): Calcd. for C<sub>10</sub>H<sub>8</sub>BrNO, [M+H]<sup>+</sup> 237.9862; found 237.9866.

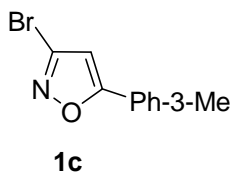

**3-Bromo-5-(3-methylphenyl)isoxazole (1c).** The title compound was prepared by the same procedure as **1a**. After a suspension of 1-copper(I) (3-methylphenyl)-ethyne (**7c**) (90 mg, 0.5 mmol) and dibromoformaldoxime (**3**) (122 mg, 0.6 mmol) in DCE (1.0 mL) was stirred at 45 °C for 75 min, the crude product was purified by a column chromatography [silica gel, 2% EtOAc in petroleum ether (60–90 °C)] to give product **1c** as a yellow oil (95 mg, 80%). IR  $\nu$  3138, 2922, 1566, 1428  $\text{cm}^{-1}$ ;  $^1\text{H}$  NMR (400 MHz,  $\text{CDCl}_3$ )  $\delta$  7.56–7.53 (m, 2H), 7.38–7.34 (m, 1H), 7.29–7.26 (m, 1H), 6.56 (s, 1H), 2.41 (s, 3H);  $^{13}\text{C}$  NMR (75 MHz,  $\text{CDCl}_3$ )  $\delta$  171.5, 140.7, 138.9, 131.7, 129.0, 126.3, 126.2, 123.0, 102.7, 21.3. HRMS (ESI-TOF) ( $m/z$ ): Calcd. for  $\text{C}_{10}\text{H}_8\text{BrNO}$ ,  $[\text{M}+\text{H}]^+$  237.9862; found 237.9864.

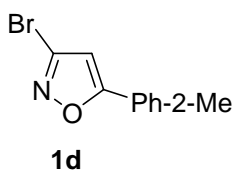

**3-Bromo-5-(2-methylphenyl)isoxazole (1d).** The title compound was prepared by the same procedure as **1a**. After a suspension of 1-copper(I) (2-methylphenyl)-ethyne (**7d**) (90 mg, 0.5 mmol) and dibromoformaldoxime (**3**) (122 mg, 0.6 mmol) in DCE (1.0 mL) was stirred at 45 °C for 80 min, the crude product was purified by a column chromatography [silica gel, 2% EtOAc in petroleum ether (60–90 °C)] to give product **1d** as a yellowish oil (104 mg, 87%). IR  $\nu$  3066, 2968, 1565, 1345  $\text{cm}^{-1}$ ;  $^1\text{H}$  NMR (400 MHz,  $\text{CDCl}_3$ )  $\delta$  7.69–7.67 (m, 1H), 7.40–7.36 (m, 1H), 7.33–7.30 (m, 2H), 6.49 (s, 1H), 2.50 (s, 3H);  $^{13}\text{C}$  NMR (100 MHz,  $\text{CDCl}_3$ )  $\delta$  171.4, 140.5, 136.4, 131.4, 130.7, 128.4, 126.4, 125.9, 105.9, 21.3. HRMS (ESI-TOF) ( $m/z$ ): Calcd. for  $\text{C}_{10}\text{H}_8\text{BrNO}$ ,  $[\text{M}-\text{H}]^+$  235.9716; found 235.9712.

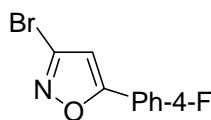

**1e**

**3-Bromo-5-(4-fluorophenyl)isoxazole (1e).** The title compound was prepared by the same procedure as **1a**. After a suspension of 1-copper(I) (4-fluorophenyl)ethyne (**7e**) (92 mg, 0.5 mmol) and dibromoformaldoxime (**3**) (122 mg, 0.6 mmol) in DCE (1.0 mL) was stirred at 45 °C for 70 min, the crude product was purified by a column chromatography [silica gel, 2% EtOAc in petroleum ether (60–90 °C)] to give product **1e** as a white solid (91 mg, 75%), mp 112–113 °C. IR  $\nu$  3070, 1632, 1529, 1351, 1082, 690  $\text{cm}^{-1}$ ;  $^1\text{H}$  NMR (400 MHz,  $\text{CDCl}_3$ )  $\delta$  7.76–7.73 (m, 2H), 7.20–7.16 (m, 2H), 6.54 (s, 1H);  $^{13}\text{C}$  NMR (75 MHz,  $\text{CDCl}_3$ )  $\delta$  170.4, 164.1 (d,  $J = 251.0$  Hz), 140.9, 128.0 (d,  $J = 8.6$  Hz, 2C), 122.7, 116.4 (d,  $J = 22.2$  Hz, 2C), 102.7. HRMS (ESI-TOF) ( $m/z$ ): Calcd. for  $\text{C}_9\text{H}_5\text{BrFNO}$ ,  $[\text{M}+\text{H}]^+$  241.9611; found 241.9609.

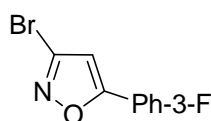

**1f**

**3-Bromo-5-(3-fluorophenyl)isoxazole (1f).** The title compound was prepared by the same procedure as **1a**. After a suspension of 1-copper(I) (3-fluorophenyl)ethyne (**7f**) (92 mg, 0.5 mmol) and dibromoformaldoxime (**3**) (122 mg, 0.6 mmol) in DCE (1.0 mL) was stirred at 45 °C for 150 min, the crude product was purified by a column chromatography [silica gel, 2% EtOAc in petroleum ether (60–90 °C)] to give product **1f** as a white solid (108 mg, 89%), mp 77–79 °C. IR  $\nu$  3150, 3132, 1573, 1350  $\text{cm}^{-1}$ ;  $^1\text{H}$  NMR (300 MHz,  $\text{CDCl}_3$ )  $\delta$  7.56–7.43 (m, 3H), 7.21–7.15 (m, 1H), 6.61 (s, 1H);  $^{13}\text{C}$  NMR (75 MHz,  $\text{CDCl}_3$ )  $\delta$  170.0, 162.9 (d,  $J = 236.6$  Hz), 140.9, 131.0 (d,  $J = 8.6$  Hz), 128.0, 121.6, 118.0 (d,  $J = 20.8$  Hz), 112.9 (d,  $J = 23.7$  Hz), 103.7. HRMS (ESI-TOF) ( $m/z$ ): Calcd. for  $\text{C}_9\text{H}_5\text{BrFNO}$ ,  $[\text{M}+\text{H}]^+$  239.9466; found 239.9466.

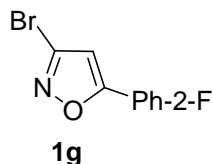

**3-Bromo-5-(2-fluorophenyl)isoxazole (1g).** The title compound was prepared by the same procedure as **1a**. After a suspension of 1-copper(I) (2-fluorophenyl)ethyne (**7g**) (92 mg, 0.5 mmol) and dibromoformaldoxime (**3**) (122 mg, 0.6 mmol) in DCE (1.0 mL) was stirred at 45 °C for 80 min, the crude product was purified by a column chromatography [silica gel, 2% EtOAc in petroleum ether (60–90 °C)] to give product **1g** as a yellowish solid (104 mg, 86%), mp 55–57 °C. IR  $\nu$  3185, 2926, 1621, 1493  $\text{cm}^{-1}$ ;  $^1\text{H}$  NMR (300 MHz,  $\text{CDCl}_3$ )  $\delta$  7.97–7.92 (m, 1H), 7.51–7.44 (m, 1H), 7.33–7.27 (m, 1H), 7.25–7.18 (m, 1H), 6.79 (d,  $J = 3.8$  Hz, 1H);  $^{13}\text{C}$  NMR (75 MHz,  $\text{CDCl}_3$ )  $\delta$  165.1, 159.1 (d,  $J = 252.4$  Hz), 141.1, 132.4 (d,  $J = 9.3$  Hz), 127.4, 124.8 (d,  $J = 3.6$  Hz), 116.3 (d,  $J = 21.5$  Hz), 114.7 (d,  $J = 12.2$  Hz), 106.8 (d,  $J = 12.2$  Hz). HRMS (ESI-TOF) ( $m/z$ ): Calcd. for  $\text{C}_9\text{H}_5\text{BrFNO}$ ,  $[\text{M}+\text{H}]^+$  241.9611; found 241.9605.

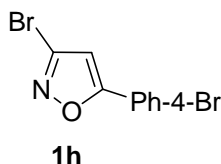

**3-Bromo-5-(4-bromophenyl)isoxazole (1h).** The title compound was prepared by the same procedure as **1a**. After a suspension of 1-copper(I) (4-bromophenyl)ethyne (**7h**) (122 mg, 0.5 mmol) and dibromoformaldoxime (**3**) (122 mg, 0.6 mmol) in DCE (1.0 mL) was stirred at 45 °C for 90 min, the crude product was purified by a column chromatography [silica gel, 2% EtOAc in petroleum ether (60–90 °C)] to give product **1h** as a white solid (126 mg, 83%), mp 159–160 °C. IR  $\nu$  3148, 1605, 1428, 1350  $\text{cm}^{-1}$ ;  $^1\text{H}$  NMR (400 MHz,  $\text{CDCl}_3$ )  $\delta$  7.64–7.59 (m, 4H), 6.59 (s, 1H);  $^{13}\text{C}$  NMR (100 MHz,  $\text{CDCl}_3$ )  $\delta$  170.3, 141.0, 132.4 (2C), 127.3 (2C), 125.5, 125.1, 103.2. HRMS (ESI-TOF) ( $m/z$ ): Calcd. for  $\text{C}_9\text{H}_5\text{Br}_2\text{NO}$ ,  $[\text{M}+\text{H}]^+$  301.8811; found 301.8809.

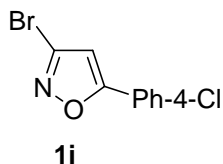

**3-Bromo-5-(4-chlorophenyl)isoxazole (1i).** The title compound was prepared by the same procedure as **1a**. After a suspension of 1-copper(I) (4-chlorophenyl)ethyne (**7i**) (100 mg, 0.5 mmol) and dibromoformaldoxime (**3**) (122 mg, 0.6 mmol) in DCE (1.0 mL) was stirred at 45 °C for 120 min, the crude product was purified by a column chromatography [silica gel, 2% EtOAc in petroleum ether (60–90 °C)] to give product **1i** as a white solid (103 mg, 80%), mp 145–146 °C (Lit.<sup>3</sup> 154–155 °C). <sup>1</sup>H NMR (400 MHz, CDCl<sub>3</sub>)  $\delta$  7.69 (d,  $J$  = 8.2 Hz, 2H), 7.47 (d,  $J$  = 8.2 Hz, 2H), 6.58 (s, 1H); <sup>13</sup>C NMR (75 MHz, CDCl<sub>3</sub>)  $\delta$  170.2, 140.9, 137.1, 129.5 (2C), 127.1 (2C), 124.7, 103.2.

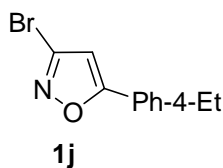

**3-Bromo-5-(4-ethylphenyl)isoxazole (1j).** The title compound was prepared by the same procedure as **1a**. After a suspension of 1-copper(I) (4-ethylphenyl)ethyne (**7j**) (97 mg, 0.5 mmol) and dibromoformaldoxime (**3**) (122 mg, 0.6 mmol) in DCE (1.0 mL) was stirred at 45 °C for 50 min, the crude product was purified by a column chromatography [silica gel, 2% EtOAc in petroleum ether (60–90 °C)] to give product **1j** as a yellow oil (111 mg, 88%). IR  $\nu$  2968, 2933, 1615, 1506, 1431 cm<sup>-1</sup>; <sup>1</sup>H NMR (300 MHz, CDCl<sub>3</sub>)  $\delta$  7.66 (d,  $J$  = 8.2 Hz, 2H), 7.30 (d,  $J$  = 8.2 Hz, 2H), 6.53 (s, 1H), 2.70 (q,  $J$  = 7.6 Hz, 2H), 1.26 (t,  $J$  = 7.6 Hz, 3H); <sup>13</sup>C NMR (100 MHz, CDCl<sub>3</sub>)  $\delta$  171.6, 147.6, 140.8, 128.6 (2C), 125.9 (2C), 123.8, 102.2, 28.8, 15.2. HRMS (ESI-TOF) ( $m/z$ ): Calcd. for C<sub>11</sub>H<sub>10</sub>BrNO, [M+H]<sup>+</sup> 252.0019; found 252.0014.



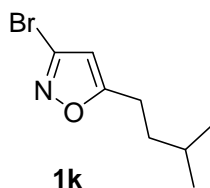

**3-Bromo-5-isopentylisoxazole (1k).** The title compound was prepared by the same procedure as **1a**. After a suspension of 1-copper(I)-5-methyl-hex-1-yne (**7k**) (80 mg, 0.5 mmol) and dibromoformaldoxime (**3**) (122 mg, 0.6 mmol) in DCE (1.0 mL) was stirred at 45 °C for 10 min, the crude product was purified by a column chromatography [silica gel, 2% EtOAc in petroleum ether (60–90 °C)] to give product **1k** as a yellowish oil (97 mg, 89%). IR  $\nu$  2959, 2930, 1586, 1438, 1359, 951  $\text{cm}^{-1}$ ;  $^1\text{H}$  NMR (400 MHz,  $\text{CDCl}_3$ )  $\delta$  6.07 (s, 1H), 2.76 (t,  $J = 7.8$  Hz, 2H), 1.63–1.55 (m, 3H), 0.94 (d,  $J = 6.4$  Hz, 6H);  $^{13}\text{C}$  NMR (100 MHz,  $\text{CDCl}_3$ )  $\delta$  175.8, 140.2, 104.3, 36.0, 27.4, 24.7, 22.1 (2C). HRMS (ESI-TOF) ( $m/z$ ): Calcd. for  $\text{C}_8\text{H}_{12}\text{BrNO}$ ,  $[\text{M}+\text{H}]^+$  218.0175; found 218.0178.

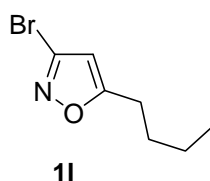

**3-Bromo-5-butylisoxazole (1l).** The title compound was prepared by the same procedure as **1a**. After a suspension of 1-copper(I)-hex-1-yne (**7l**) (73 mg, 0.5 mmol) and dibromoformaldoxime (**3**) (122 mg, 0.6 mmol) in DCE (1.0 mL) was stirred at 45 °C for 30 min, the crude product was purified by a column chromatography [silica gel, 2% EtOAc in petroleum ether (60–90 °C)] to give product **1l** as a yellowish oil (85 mg, 83%). IR  $\nu$  2960, 2934, 2872, 1586, 1439  $\text{cm}^{-1}$ ;  $^1\text{H}$  NMR (300 MHz,  $\text{CDCl}_3$ )  $\delta$  6.07 (s, 1H), 2.76 (t,  $J = 7.9$  Hz, 2H), 1.72–1.62 (m, 2H), 1.46–1.33 (m, 2H), 0.94 (t,  $J = 7.6$  Hz, 3H);  $^{13}\text{C}$  NMR (75 MHz,  $\text{CDCl}_3$ )  $\delta$  175.7, 140.2, 104.4, 29.2, 26.4, 22.0, 13.6. HRMS (ESI-TOF) ( $m/z$ ): Calcd. for  $\text{C}_7\text{H}_{10}\text{BrNO}$ ,  $[\text{M}+\text{H}]^+$  204.0019; found 204.0021.

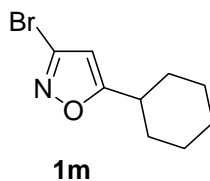

**3-Bromo-5-cyclohexylisoxazole (1m).** The title compound was prepared by the same procedure as **1a**. After a suspension of 1-copper(I) cyclohexylethyne (**7m**) (86 mg, 0.5 mmol) and dibromoformaldoxime (**3**) (122 mg, 0.6 mmol) in DCE (1.0 mL) was stirred at 45 °C for 40 min, the crude product was purified by a column chromatography [silica gel, 2% EtOAc in petroleum ether (60–90 °C)] to give product **1m** as a colorless oil (112 mg, 97%). IR  $\nu$  2932, 2856, 1580, 1448, 1349, 951  $\text{cm}^{-1}$ ;  $^1\text{H}$  NMR (300 MHz,  $\text{CDCl}_3$ )  $\delta$  6.03 (d,  $J$  = 0.7 Hz, 1H), 2.82–2.73 (m, 1H), 2.05–1.97 (m, 2H), 1.83–1.71 (m, 4H), 1.49–1.22 (m, 4H);  $^{13}\text{C}$  NMR (75 MHz,  $\text{CDCl}_3$ )  $\delta$  179.6, 140.0, 102.8, 36.3, 30.8 (2C), 25.6, 25.5 (2C). HRMS (ESI-TOF) ( $m/z$ ): Calcd. for  $\text{C}_9\text{H}_{12}\text{BrNO}$ ,  $[\text{M}+\text{H}]^+$  230.0175; found 230.0179.

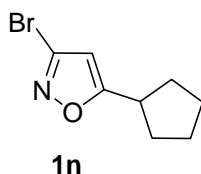

**3-Bromo-5-cyclopentylisoxazole (1n).** The title compound was prepared by the same procedure as **1a**. After a suspension of 1-copper(I) cyclopentylethyne (**7n**) (79 mg, 0.5 mmol) and dibromoformaldoxime (**3**) (122 mg, 0.6 mmol) in DCE (1.0 mL) was stirred at 45 °C for 15 min, the crude product was purified by a column chromatography [silica gel, 2% EtOAc in petroleum ether (60–90 °C)] to give product **1n** as a yellowish oil (94 mg, 87%). IR  $\nu$  2961, 2872, 1581, 1439  $\text{cm}^{-1}$ ;  $^1\text{H}$  NMR (400 MHz,  $\text{CDCl}_3$ )  $\delta$  6.05 (s, 1H), 3.24–3.16 (m, 1H), 2.13–2.04 (m, 2H), 1.82–1.65 (m, 6H);  $^{13}\text{C}$  NMR (75 MHz,  $\text{CDCl}_3$ )  $\delta$  179.7, 153.0, 100.4, 37.7, 31.6 (2C), 25.2 (2C). HRMS (ESI-TOF) ( $m/z$ ): Calcd. for  $\text{C}_8\text{H}_{10}\text{BrNO}$ ,  $[\text{M}+\text{H}]^+$  216.0019; found 216.0015.

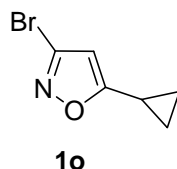

**3-Bromo-5-cyclopropylisoxazole (1o).** The title compound was prepared by the same procedure as **1a**. After a suspension of 1-copper(I) cyclopropylethyne (**7o**) (65 mg, 0.5 mmol) and dibromoformaldoxime (**3**) (122 mg, 0.6 mmol) in DCE (1.0 mL) was stirred at 45 °C for 35 min, the crude product was purified by a column chromatography [silica gel, 2% EtOAc in petroleum ether (60–90 °C)] to give product **1o** as a yellowish oil (72 mg, 77%). IR (KBr)  $\nu$  2961, 2926, 1589, 1444, 1346, 1261, 1048  $\text{cm}^{-1}$ ;  $^1\text{H}$  NMR (400 MHz,  $\text{CDCl}_3$ )  $\delta$  5.94 (s, 1H), 2.05–1.98 (m, 1H), 1.12–1.08 (m, 2H), 1.01–0.97 (m, 2H);  $^{13}\text{C}$  NMR (75 MHz,  $\text{CDCl}_3$ )  $\delta$  176.5, 140.3, 102.4, 8.7 (2C), 8.1. HRMS (ESI-TOF) ( $m/z$ ): calcd. for  $\text{C}_6\text{H}_6\text{BrNO}$ ,  $[\text{M}+\text{H}]^+$  187.9706; found 187.9702.

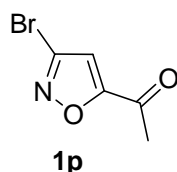

**1-(3-Bromoisoxazol-5-yl)ethanone (1p).** The title compound was prepared by the same procedure as **1a**. After a suspension of 1-copper(I)-3-oxo-but-1-yne (**7p**) (66 mg, 0.5 mmol) and dibromoformaldoxime (**3**) (122 mg, 0.6 mmol) in DCE (1.0 mL) was stirred at 45 °C for 6 h, the crude product was purified by a column chromatography [silica gel, 4% EtOAc in petroleum ether (60–90 °C)] to give product **1p** as a white solid (54 mg, 57%), mp 54–55 °C (Lit.<sup>4</sup> 61–62 °C).  $^1\text{H}$  NMR (400 MHz,  $\text{CDCl}_3$ )  $\delta$  6.95 (s, 1H), 2.62 (s, 3H);  $^{13}\text{C}$  NMR (100 MHz,  $\text{CDCl}_3$ )  $\delta$  185.8, 167.3, 141.1, 110.3, 27.0.

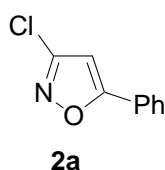

**A typical procedure for preparation of 3-chloro-5-phenylisoxazole (2a).** To a suspension of 1-copper(I) phenylethyne (**7a**) (83 mg, 0.5 mmol) in DMF (0.5 mL) was added a solution of dichloroformaldoxime (**4**) (68 mg, 0.6 mmol) in DMF (0.5 mL). After the mixture was stirred at 45 °C (water bath) for 1 h (the end-point was judged by the conversion of the suspension into a transparent solution), it was purified directly by a column chromatography [silica gel, 2% EtOAc in petroleum ether (60–90 °C)] to give 83 mg (92%) of product **2a** as a yellowish solid, mp 35–37 °C (Lit.<sup>3</sup> 36–37 °C). <sup>1</sup>H NMR (400 MHz, CDCl<sub>3</sub>)  $\delta$  7.76–7.73 (m, 2H), 7.51–7.47 (m, 3H), 6.52 (s, 1H); <sup>13</sup>C NMR (75 MHz, CDCl<sub>3</sub>)  $\delta$  171.6, 153.8, 131.0, 129.1 (2C), 126.4, 125.7 (2C), 100.1.

The products **2b-2p** were prepared by the similar procedure.

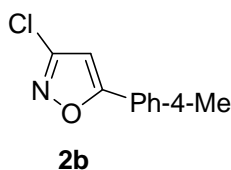

**3-Chloro-5-(4-methylphenyl)isoxazole (2b).** The title compound was prepared by the same procedure as **2a**. After a suspension of 1-copper(I) (4-methylphenyl)-ethyne (**7b**) (90 mg, 0.5 mmol) and dichloroformaldoxime (**4**) (68 mg, 0.6 mmol) in DMF (1.0 mL) was stirred at 45 °C for 30 min, the crude product was purified by a column chromatography [silica gel, 2% EtOAc in petroleum ether (60–90 °C)] to give product **2b** as a white solid (82 mg, 85%), mp 55–56 °C (Lit.<sup>3</sup> 61–62 °C). <sup>1</sup>H NMR (400 MHz, CDCl<sub>3</sub>)  $\delta$  7.63 (d, *J* = 7.8 Hz, 2H), 7.27 (d, *J* = 7.8 Hz, 2H), 6.46 (s, 1H), 2.41 (s, 3H); <sup>13</sup>C NMR (75 MHz, CDCl<sub>3</sub>)  $\delta$  171.8, 153.7, 141.4, 129.8 (2C), 125.7 (2C), 123.8, 99.4, 21.5.

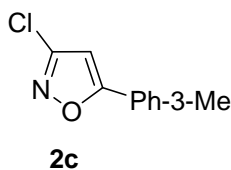

**3-Chloro-5-(3-methylphenyl)isoxazole (2c).** The title compound was prepared

by the same procedure as **2a**. After a suspension of 1-copper(I) (3-methylphenyl)-ethyne (**7c**) (90 mg, 0.5 mmol) and dichloroformaldoxime (**4**) (68 mg, 0.6 mmol) in DMF (1.0 mL) was stirred at 45 °C for 41 min, the crude product was purified by a column chromatography [silica gel, 2% EtOAc in petroleum ether (60–90 °C)] to give product **2c** as a white solid (90 mg, 93%), mp 42–43 °C. IR  $\nu$  3148, 2923, 1608, 1570, 1448  $\text{cm}^{-1}$ ;  $^1\text{H}$  NMR (400 MHz,  $\text{CDCl}_3$ )  $\delta$  7.55–7.53 (m, 2H), 7.36 (t,  $J$  = 7.8 Hz, 1H), 7.29–7.25 (m, 1H), 6.50 (s, 1H), 2.41 (s, 3H);  $^{13}\text{C}$  NMR (75 MHz,  $\text{CDCl}_3$ )  $\delta$  171.8, 153.7, 138.9, 131.7, 129.0, 126.4, 126.3, 122.9, 99.9, 21.3. HRMS (ESI-TOF) ( $m/z$ ): Calcd. for  $\text{C}_{10}\text{H}_8\text{ClNO}$ ,  $[\text{M}+\text{H}]^+$  194.0367; found 194.0372.

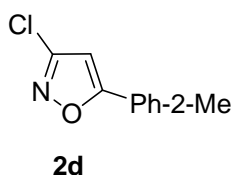

**3-Chloro-5-(2-methylphenyl)isoxazole (2d).** The title compound was prepared by the same procedure as **2a**. After a suspension of 1-copper(I) (2-methylphenyl)-ethyne (**7d**) (90 mg, 0.5 mmol) and dichloroformaldoxime (**4**) (68 mg, 0.6 mmol) in DMF (1.0 mL) was stirred at 45 °C for 54 min, the crude product was purified by a column chromatography [silica gel, 2% EtOAc in petroleum ether (60–90 °C)] to give product **2d** as a colorless oil (87 mg, 90%). IR  $\nu$  2962, 2865, 1567, 1359  $\text{cm}^{-1}$ ;  $^1\text{H}$  NMR (400 MHz,  $\text{CDCl}_3$ )  $\delta$  7.70–7.68 (m, 1H), 7.41–7.37 (m, 1H), 7.33–7.30 (m, 2H), 6.44 (s, 1H), 2.50 (s, 3H);  $^{13}\text{C}$  NMR (75 MHz,  $\text{CDCl}_3$ )  $\delta$  171.7, 153.3, 136.3, 131.4, 130.7, 128.3, 126.3, 126.1, 103.1, 21.3. HRMS (ESI-TOF) ( $m/z$ ): Calcd. for  $\text{C}_{10}\text{H}_8\text{ClNO}$ ,  $[\text{M}+\text{H}]^+$  194.0367; found 194.0369.

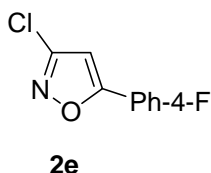

**3-Chloro-5-(4-fluorophenyl)isoxazole (2e).** The title compound was prepared by the same procedure as **2a**. After a suspension of 1-copper(I) (4-fluorophenyl)ethyne (**7e**) (92 mg, 0.5 mmol) and dichloroformaldoxime (**4**) (68 mg, 0.6 mmol) in DMF

(1.0 mL) was stirred at 45 °C for 90 min, the crude product was purified by a column chromatography [silica gel, 2% EtOAc in petroleum ether (60–90 °C)] to give product **2e** as a white solid (90 mg, 90%), mp 88–90 °C. IR  $\nu$  3165, 3148, 1614, 1505  $\text{cm}^{-1}$ ;  $^1\text{H}$  NMR (400 MHz,  $\text{CDCl}_3$ )  $\delta$  7.76–7.72 (m, 2H), 7.21–7.15 (m, 2H), 6.49 (s, 1H);  $^{13}\text{C}$  NMR (75 MHz,  $\text{CDCl}_3$ )  $\delta$  170.8, 164.3 (d,  $J = 251.0$  Hz), 154.0, 128.1 (d,  $J = 8.6$  Hz, 2C), 123.0 (d,  $J = 2.9$  Hz), 116.5 (d,  $J = 22.2$  Hz, 2C), 100.0. HRMS (ESI-TOF) ( $m/z$ ): Calcd. for  $\text{C}_9\text{H}_5\text{ClFNO}$ ,  $[\text{M}+\text{H}]^+$  198.0116; found 198.0115.

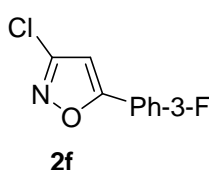

**3-Chloro-5-(3-fluorophenyl)isoxazole (2f).** The title compound was prepared by the same procedure as **2a**. After a suspension of 1-copper(I) (3-fluorophenyl)ethyne (**7f**) (92 mg, 0.5 mmol) and dichloroformaldoxime (**4**) (68 mg, 0.6 mmol) in DMF (1.0 mL) was stirred at 45 °C for 80 min, the crude product was purified by a column chromatography [silica gel, 2% EtOAc in petroleum ether (60–90 °C)] to give product **2f** as a yellowish solid (81 mg, 82%), mp 72–73 °C. IR  $\nu$  3154, 3072, 1576, 1457  $\text{cm}^{-1}$ ;  $^1\text{H}$  NMR (400 MHz,  $\text{CDCl}_3$ )  $\delta$  7.54–7.52 (m, 1H), 7.49–7.44 (m, 2H), 7.21–7.16 (m, 1H), 6.56 (s, 1H);  $^{13}\text{C}$  NMR (75 MHz,  $\text{CDCl}_3$ )  $\delta$  170.2 (d,  $J = 2.9$  Hz), 162.8 (d,  $J = 245.9$  Hz), 153.9, 130.9 (d,  $J = 8.6$  Hz), 128.2 (d,  $J = 7.9$  Hz), 121.5 (d,  $J = 2.9$  Hz), 117.9 (d,  $J = 21.5$  Hz), 112.7 (d,  $J = 23.7$  Hz), 100.9. HRMS (ESI-TOF) ( $m/z$ ): Calcd. for  $\text{C}_9\text{H}_5\text{ClFNO}$ ,  $[\text{M}+\text{H}]^+$  198.0116; found 198.0113.

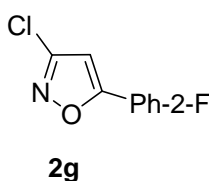

**3-Chloro-5-(2-fluorophenyl)isoxazole (2g).** The title compound was prepared by the same procedure as **2a**. After a suspension of 1-copper(I) (2-fluorophenyl)ethyne (**7g**) (92 mg, 0.5 mmol) and dichloroformaldoxime (**4**) (68 mg, 0.6 mmol) in DMF

(1.0 mL) was stirred at 45 °C for 30 min, the crude product was purified by a column chromatography [silica gel, 2% EtOAc in petroleum ether (60–90 °C)] to give product **2g** as a white solid (88 mg, 89%), mp 54–55 °C. IR  $\nu$  3180, 2925, 1622, 1493  $\text{cm}^{-1}$ ;  $^1\text{H}$  NMR (300 MHz,  $\text{CDCl}_3$ )  $\delta$  7.96–7.90 (m, 1H), 7.51–7.43 (m, 1H), 7.32–7.17 (m, 2H), 6.72 (d,  $J$  = 3.8 Hz, 1H);  $^{13}\text{C}$  NMR (75 MHz,  $\text{CDCl}_3$ )  $\delta$  165.6 (d,  $J$  = 2.1 Hz), 159.3 (d,  $J$  = 252.4 Hz), 154.2, 132.6 (d,  $J$  = 8.6 Hz), 127.4, 125.0 (d,  $J$  = 3.6 Hz), 116.5 (d,  $J$  = 20.8 Hz), 115.1 (d,  $J$  = 12.2 Hz), 104.2 (d,  $J$  = 11.5 Hz). HRMS (ESI-TOF) ( $m/z$ ): Calcd. for  $\text{C}_9\text{H}_5\text{ClFNO}$ ,  $[\text{M}+\text{H}]^+$  198.0116; found 198.0118.

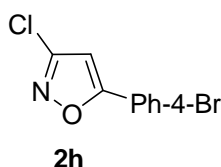

**3-Chloro-5-(4-bromophenyl)isoxazole (2h).** The title compound was prepared by the same procedure as **2a**. After a suspension of 1-copper(I) (4-bromophenyl)ethyne (**7h**) (122 mg, 0.5 mmol) and dichloroformaldoxime (**4**) (68 mg, 0.6 mmol) in DMF (1.0 mL) was stirred at 45 °C for 35 min, the crude product was purified by a column chromatography [silica gel, 2% EtOAc in petroleum ether (60–90 °C)] to give product **2h** as a white solid (118 mg, 91%), mp 141–142 °C. IR  $\nu$  3147, 3075, 1605, 1434  $\text{cm}^{-1}$ ;  $^1\text{H}$  NMR (400 MHz,  $\text{CDCl}_3$ )  $\delta$  7.64–7.59 (m, 4H), 6.54 (s, 1H);  $^{13}\text{C}$  NMR (75 MHz,  $\text{CDCl}_3$ )  $\delta$  170.6, 153.9, 132.4 (2C), 127.2 (2C), 125.5, 125.3, 100.5. HRMS (ESI-TOF) ( $m/z$ ): Calcd. for  $\text{C}_9\text{H}_5\text{BrClNO}$ ,  $[\text{M}-\text{H}]^+$  255.9170; found 255.9169.

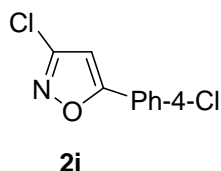

**3-Chloro-5-(4-chlorophenyl)isoxazole (2i).** The title compound was prepared by the same procedure as **2a**. After a suspension of 1-copper(I) (4-chlorophenyl)ethyne (**7i**) (100 mg, 0.5 mmol) and dichloroformaldoxime (**4**) (68 mg, 0.6 mmol) in DMF (1.0 mL) was stirred at 45 °C for 47 min, the crude product was purified by a column

chromatography [silica gel, 2% EtOAc in petroleum ether (60–90 °C)] to give product **2i** as a white solid (102 mg, 95%), mp 122–124 °C (Lit.<sup>3</sup> 140–141 °C). <sup>1</sup>H NMR (400 MHz, CDCl<sub>3</sub>)  $\delta$  7.68 (d, *J* = 8.7 Hz, 2H), 7.46 (d, *J* = 8.7 Hz, 2H), 6.53 (s, 1H); <sup>13</sup>C NMR (75 MHz, CDCl<sub>3</sub>)  $\delta$  170.5, 153.9, 137.1, 129.5 (2C), 127.0 (2C), 124.9, 100.4.

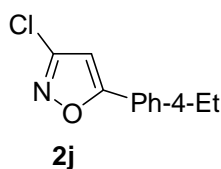

**3-Chloro-5-(4-ethylphenyl)isoxazole (2j).** The title compound was prepared by the same procedure as **2a**. After a suspension of 1-copper(I) (4-ethylphenyl)ethyne (**7j**) (97 mg, 0.5 mmol) and dichloroformaldoxime (**4**) (68 mg, 0.6 mmol) in DMF (1.0 mL) was stirred at 45 °C for 37 min, the crude product was purified by a column chromatography [silica gel, 2% EtOAc in petroleum ether (60–90 °C)] to give product **2j** as a yellowish oil (101 mg, 97%). IR  $\nu$  3138, 2968, 1615, 1506, 1435 cm<sup>-1</sup>; <sup>1</sup>H NMR (400 MHz, CDCl<sub>3</sub>)  $\delta$  7.66 (d, *J* = 8.2 Hz, 2H), 7.30 (d, *J* = 8.2 Hz, 2H), 6.47 (s, 1H), 2.70 (q, *J* = 7.8 Hz, 2H), 1.26 (t, *J* = 7.8 Hz, 3H); <sup>13</sup>C NMR (75 MHz, CDCl<sub>3</sub>)  $\delta$  171.8, 153.6, 147.6, 128.6 (2C), 125.8 (2C), 124.0, 99.4, 28.8, 15.2. HRMS (ESI-TOF) (*m/z*): Calcd. for C<sub>11</sub>H<sub>10</sub>ClNO, [M+H]<sup>+</sup> 208.0524; found 208.0523.

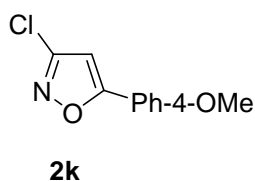

**3-Chloro-5-(4-methoxyphenyl)isoxazole (2k).** The title compound was prepared by the same procedure as **2a**. After a suspension of 1-copper(I) (4-methoxyphenyl)ethyne (**7q**) (98 mg, 0.5 mmol) and dichloroformaldoxime (**4**) (68 mg, 0.6 mmol) in DMF (1.0 mL) was stirred at 45 °C for 47 min, the crude product was purified by a column chromatography [silica gel, 4% EtOAc in petroleum ether (60–90 °C)] to give product **2k** as a white solid (100 mg, 95%), mp 65–66 °C. IR  $\nu$  3136, 2966, 2837, 1614, 1508, 1435 cm<sup>-1</sup>; <sup>1</sup>H NMR (400 MHz, CDCl<sub>3</sub>)  $\delta$  7.68 (d, *J* = 8.7 Hz, 2H), 6.98



(d,  $J = 8.7$  Hz, 2H), 6.40 (s, 1H), 3.86 (s, 3H);  $^{13}\text{C}$  NMR (75 MHz,  $\text{CDCl}_3$ )  $\delta$  171.6, 161.6, 153.7, 127.4 (2C), 119.2, 114.5 (2C), 98.6, 55.4. HRMS (ESI-TOF) ( $m/z$ ): Calcd. for  $\text{C}_{10}\text{H}_8\text{ClNO}_2$ ,  $[\text{M}+\text{H}]^+$  210.0316; found 210.0310.

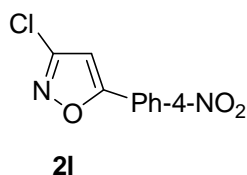

**3-Chloro-5-(4-nitrophenyl)isoxazole (2l).** The title compound was prepared by the same procedure as **2a**. After a suspension of 1-copper(I) (4-nitrophenyl)ethyne (**7r**) (105 mg, 0.5 mmol) and dichloroformaldoxime (**4**) (68 mg, 0.6 mmol) in DMF (1.0 mL) was stirred at 45 °C for 33 min, the crude product was purified by a column chromatography [silica gel, 7% EtOAc in petroleum ether (60–90 °C)] to give product **2l** as a yellowish solid (93 mg, 83%), mp 212–214 °C (Lit.<sup>3</sup> 213–214 °C).  $^1\text{H}$  NMR (400 MHz,  $\text{CDCl}_3$ )  $\delta$  8.37 (d,  $J = 8.7$  Hz, 2H), 7.95 (d,  $J = 8.7$  Hz, 2H), 6.73 (s, 1H);  $^{13}\text{C}$  NMR (75 MHz,  $\text{CDCl}_3$ )  $\delta$  169.0, 154.3, 148.9, 131.8, 126.7 (2C), 124.5 (2C), 102.7.

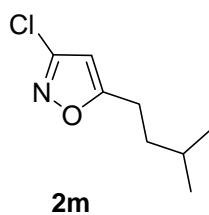

**3-Chloro-5-isopentylisoxazole (2m).** The title compound was prepared by the same procedure as **2a**. After a suspension of 1-copper(I)-5-methyl-hex-1-yne (**7k**) (80 mg, 0.5 mmol) and dichloroformaldoxime (**4**) (68 mg, 0.6 mmol) in DMF (1.0 mL) was stirred at 45 °C for 12 min, the crude product was purified by a column chromatography [silica gel, 2% EtOAc in petroleum ether (60–90 °C)] to give product **2m** as a yellowish oil (70 mg, 81%). IR  $\nu$  2960, 2932, 1592, 1447  $\text{cm}^{-1}$ ;  $^1\text{H}$  NMR (400 MHz,  $\text{CDCl}_3$ )  $\delta$  6.02 (s, 1H), 2.74 (t,  $J = 7.4$  Hz, 2H), 1.64–1.57 (m, 3H), 0.94 (d,  $J = 6.0$  Hz, 6H);  $^{13}\text{C}$  NMR (100 MHz,  $\text{CDCl}_3$ )  $\delta$  176.1, 153.1, 101.6, 36.0, 27.4, 25.0,

22.1 (2C). HRMS (ESI-TOF) ( $m/z$ ): Calcd. for  $C_8H_{12}ClNO$ ,  $[M+H]^+$  174.0679; found 174.0680.

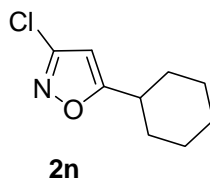

**3-Chloro-5-cyclohexylisoxazole (2n).** The title compound was prepared by the same procedure as **2a**. After a suspension of 1-copper(I) cyclohexylethyne (**7m**) (86 mg, 0.5 mmol) and dichloroformaldoxime (**4**) (68 mg, 0.6 mmol) in DMF (1.0 mL) was stirred at 45 °C for 30 min, the crude product was purified by a column chromatography [silica gel, 2% EtOAc in petroleum ether (60–90 °C)] to give product **2n** as a colorless oil (86 mg, 93%). IR  $\nu$  2933, 2857, 1585, 1448  $cm^{-1}$ ;  $^1H$  NMR (400 MHz,  $CDCl_3$ )  $\delta$  5.98 (s, 1H), 2.82–2.76 (m, 1H), 2.08–2.02 (m, 2H), 1.89–1.74 (m, 3H), 1.51–1.36 (m, 4H), 1.37–1.25 (m, 1H);  $^{13}C$  NMR (75 MHz,  $CDCl_3$ )  $\delta$  179.9, 153.0, 100.1, 36.5, 30.8 (2C), 25.6, 25.5 (2C). HRMS (ESI-TOF) ( $m/z$ ): Calcd. for  $C_9H_{12}ClNO$ ,  $[M+H]^+$  186.0680; found 186.0679.

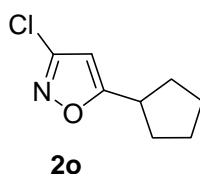

**3-Chloro-5-cyclopentylisoxazole (2o).** The title compound was prepared by the same procedure as **2a**. After a suspension of 1-copper(I) cyclopentylethyne (**7n**) (79 mg, 0.5 mmol) and dichloroformaldoxime (**4**) (68 mg, 0.6 mmol) in DMF (1.0 mL) at 45 °C for 10 min, the crude product was purified by a column chromatography [silica gel, 2% EtOAc in petroleum ether (60–90 °C)] to give product **2o** as a yellowish oil (69 mg, 80%). IR  $\nu$  2962, 2873, 1587, 1446  $cm^{-1}$ ;  $^1H$  NMR (400 MHz,  $CDCl_3$ )  $\delta$  6.00 (s, 1H), 3.22–3.14 (m, 1H), 2.12–2.04 (m, 2H), 1.78–1.63 (m, 6H);  $^{13}C$  NMR (100 MHz,  $CDCl_3$ )  $\delta$  179.7, 152.9, 100.4, 37.7, 31.6 (2C), 25.2 (2C). HRMS (ESI-TOF) ( $m/z$ ): Calcd. for  $C_8H_{10}ClNO$ ,  $[M+H]^+$  172.0524; found 172.0524.

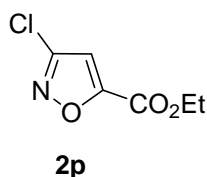

**Ethyl 3-chloroisoxazole-5-carboxylate (2p).** The title compound was prepared by the same procedure as **2a**. After a suspension of 1-copper(I) ethyl propiolate (**7s**) (81 mg, 0.5 mmol) and dichloroformaldoxime (**4**) (68 mg, 0.6 mmol) in DMF (1.0 mL) at 45 °C for 34 min, the crude product was purified by a column chromatography [silica gel, 4% EtOAc in petroleum ether (60–90 °C)] to give product **2p** as a yellowish oil (55 mg, 63%). IR  $\nu$  2988, 1745, 1581, 1366  $\text{cm}^{-1}$ ;  $^1\text{H}$  NMR (400 MHz,  $\text{CDCl}_3$ )  $\delta$  6.94 (s, 1H), 4.44 (q,  $J$  = 6.9 Hz, 2H), 1.42 (t,  $J$  = 6.9 Hz, 3H);  $^{13}\text{C}$  NMR (75 MHz,  $\text{CDCl}_3$ )  $\delta$  161.7, 155.8, 153.8, 109.7, 62.7, 14.1. HRMS (ESI-TOF) ( $m/z$ ): Calcd. for  $\text{C}_6\text{H}_6\text{ClNO}_3$ ,  $[\text{M}+\text{H}]^+$  176.0109; found 176.0106.

## References

1. Orth, R.; Bottcher, T.; Sieber, S. A. *Chem. Commun.* **2010**, 46, 8475–8477.
2. (a) Jouvin, K.; Heimburger, J.; Evano, G. *Chem. Sci.* **2012**, 3, 756–760. (b) Woon, E. C. Y.; Dhami, A.; Mahon, M. F.; Threadgill, M. D. *Tetrahedron* **2006**, 62, 4829–4837; (c) Owsley, D. C.; Castro, C. E. *Org. Synth.* **1972**, 52, 128–130.
3. Carr, J. B.; Durham, H. G.; Hass, D. K. *J. Med. Chem.* **1977**, 20, 934–939.
4. Amici, M. D.; Micheli, C. D.; Carrea, G.; Spezia, S. *J. Org. Chem.* **1989**, 54, 2646–2650.

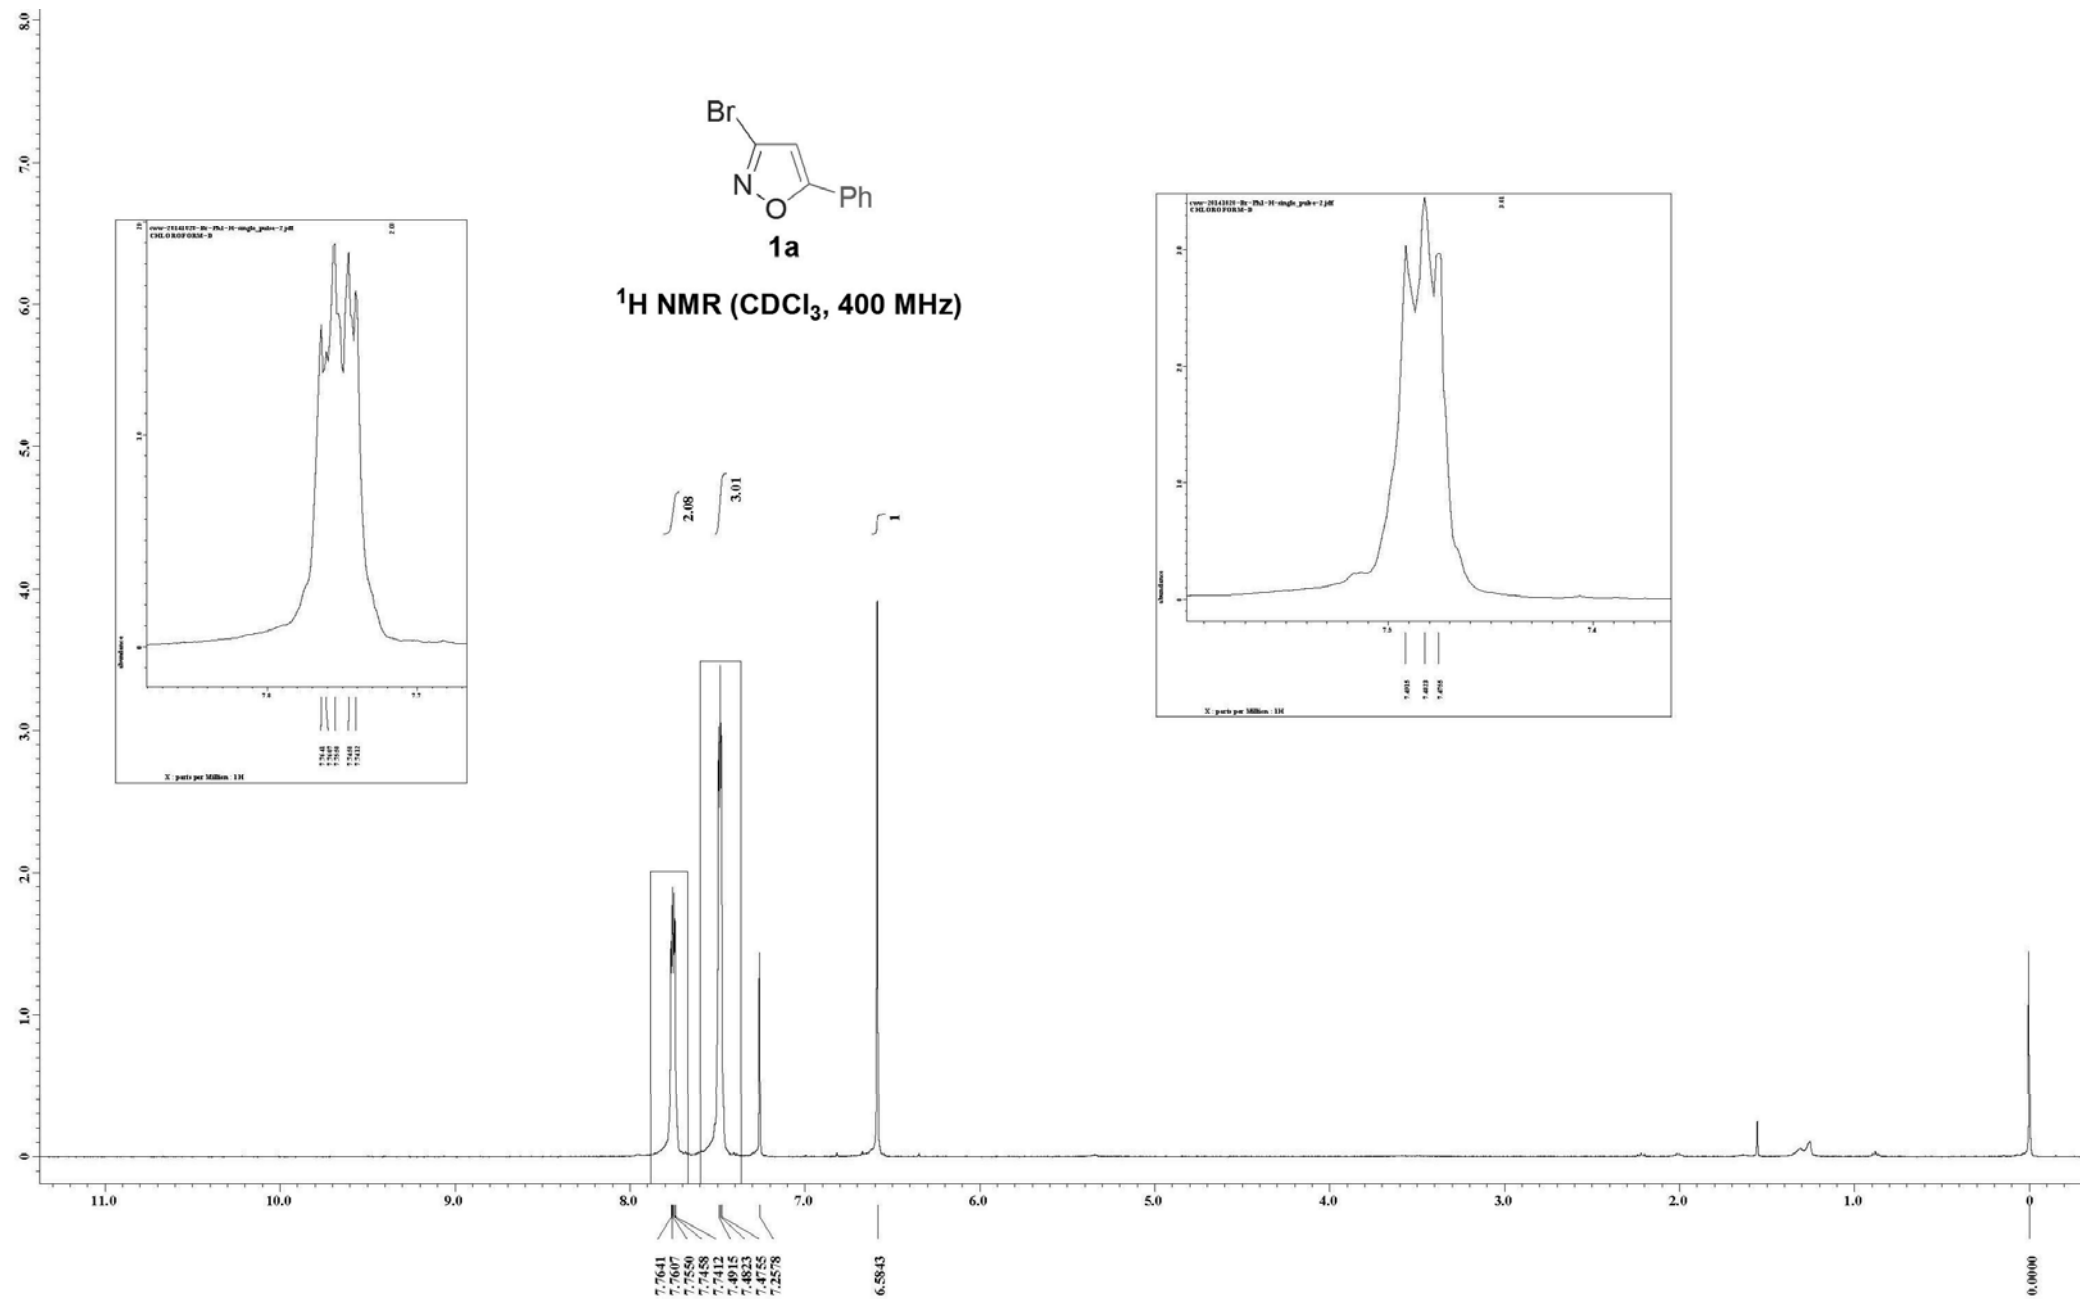

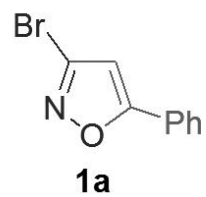

**$^{13}\text{C}$  NMR ( $\text{CDCl}_3$ , 100 MHz)**

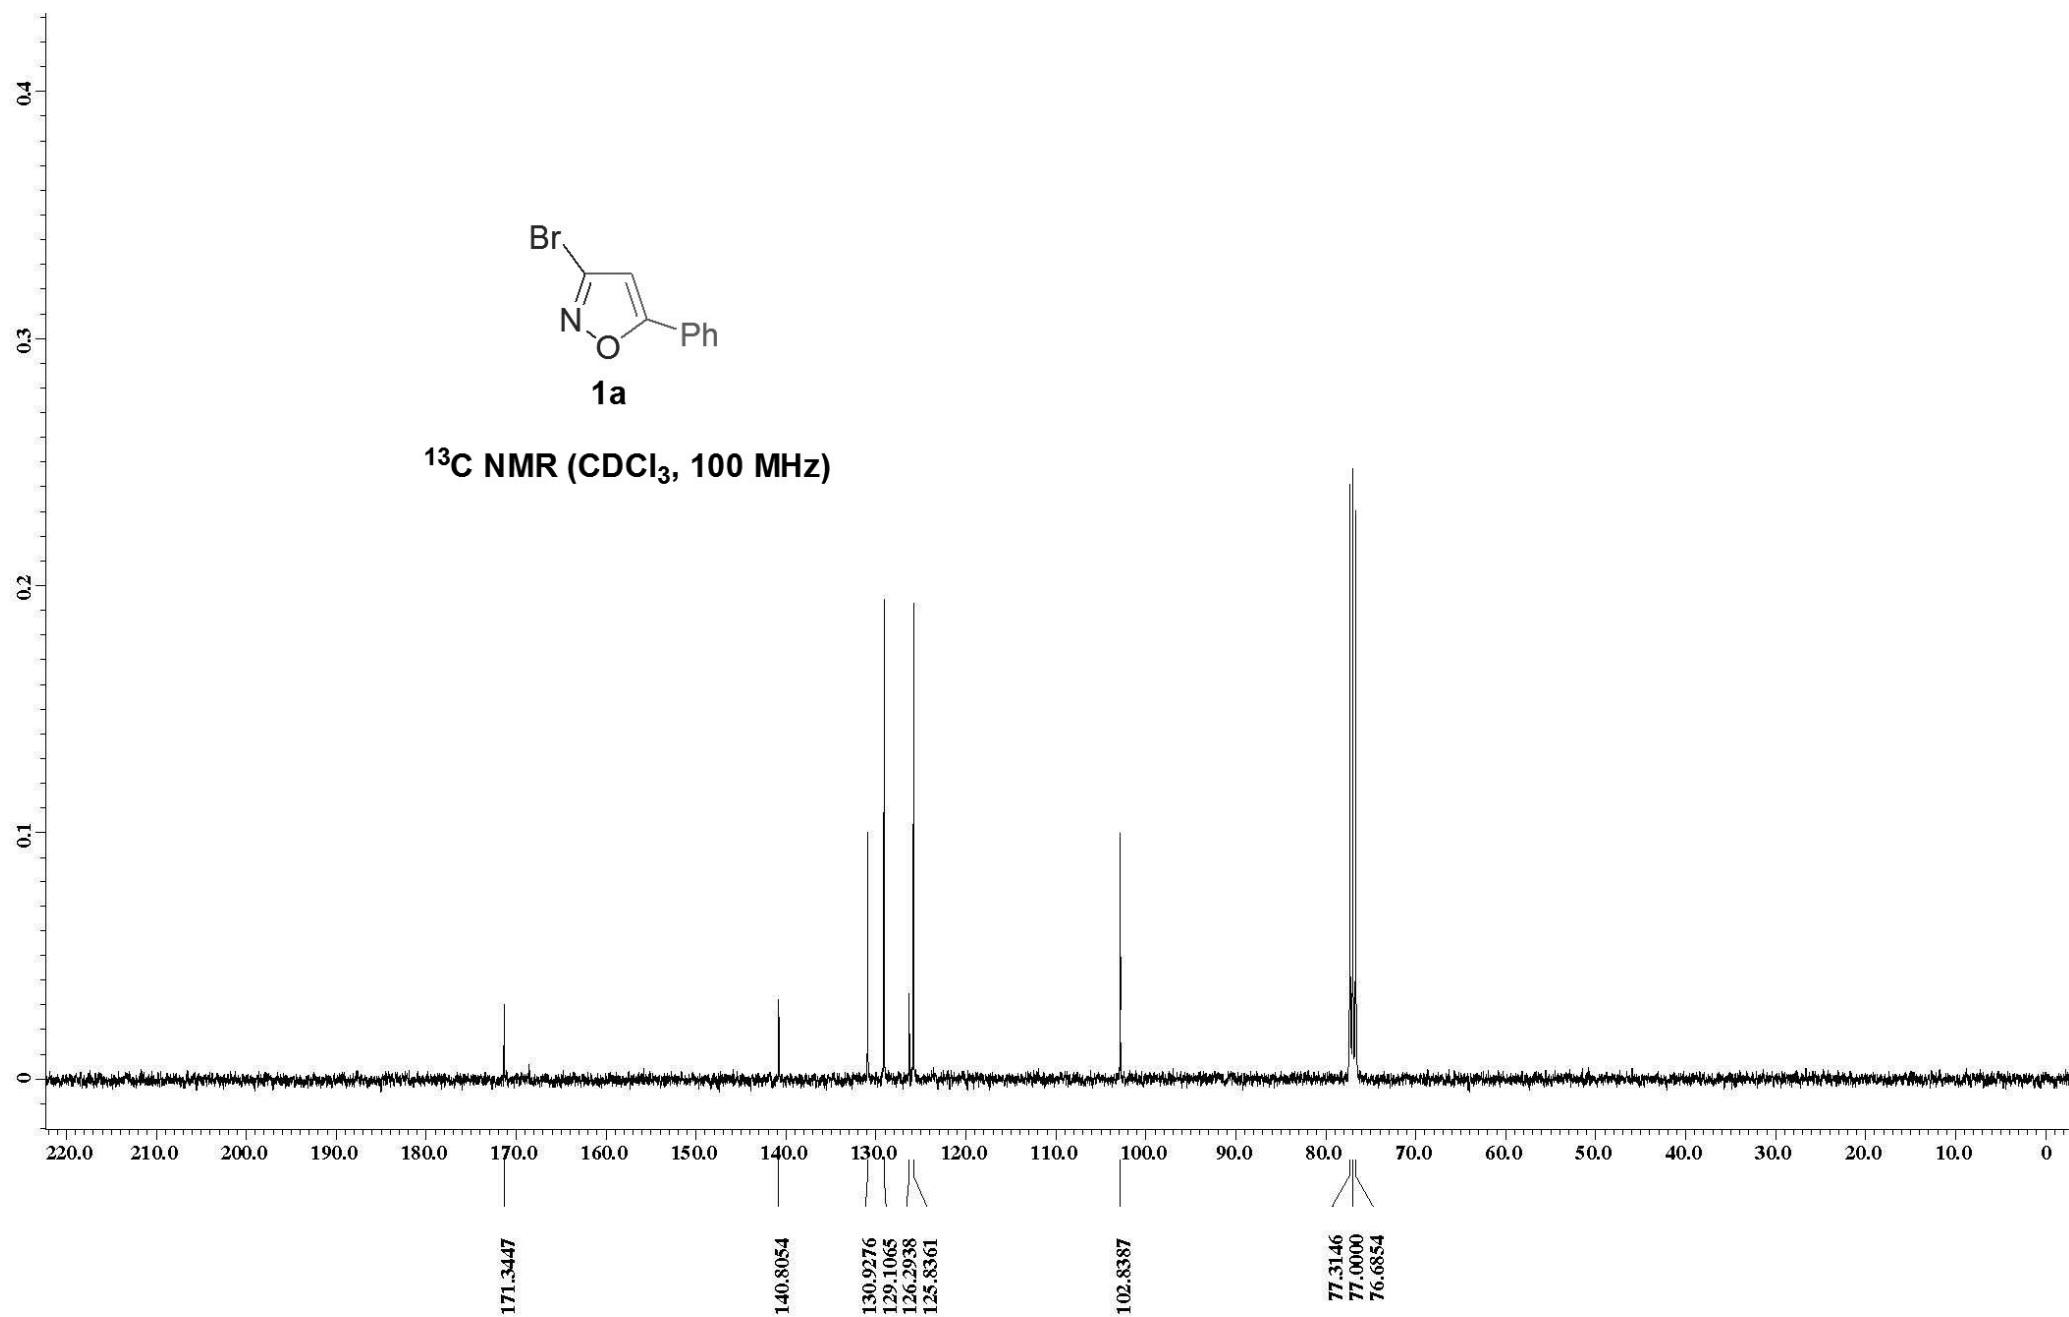

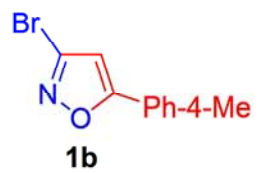

$^1\text{H}$  NMR ( $\text{CDCl}_3$ , 300 MHz)

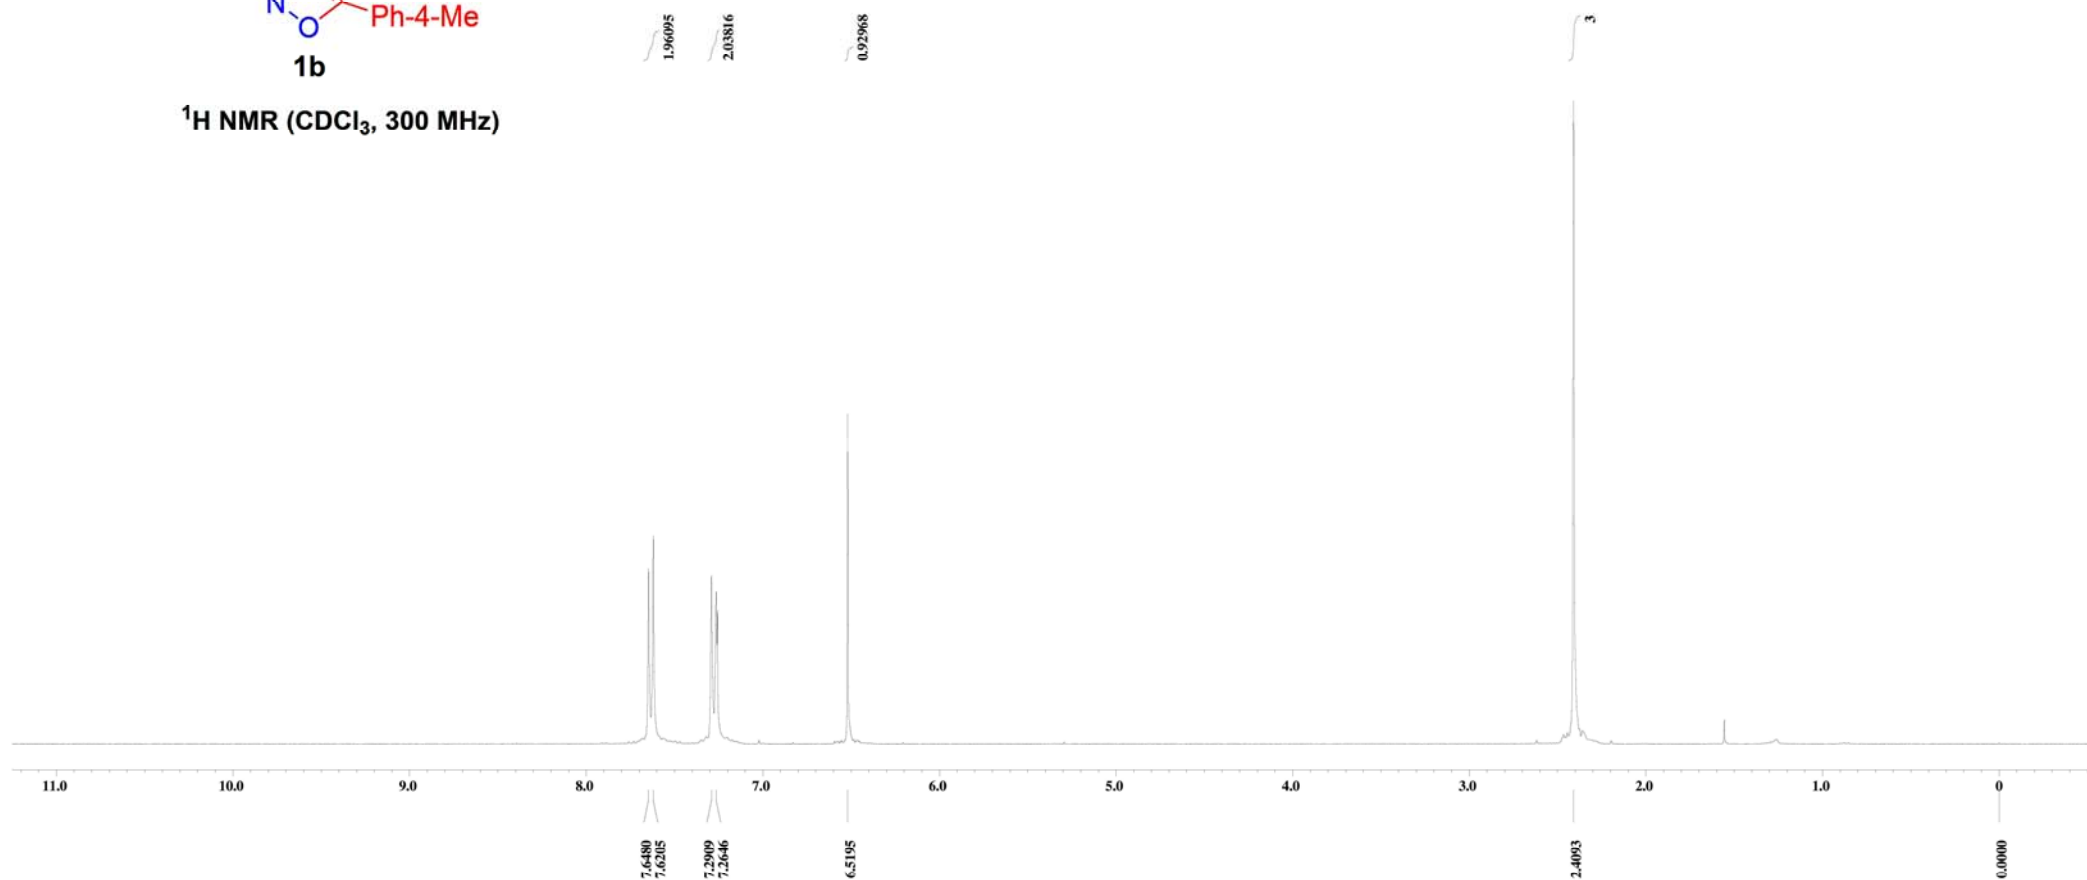

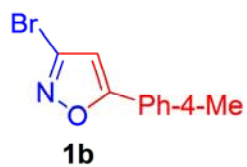

$^{13}\text{C}$  NMR ( $\text{CDCl}_3$ , 75 MHz)

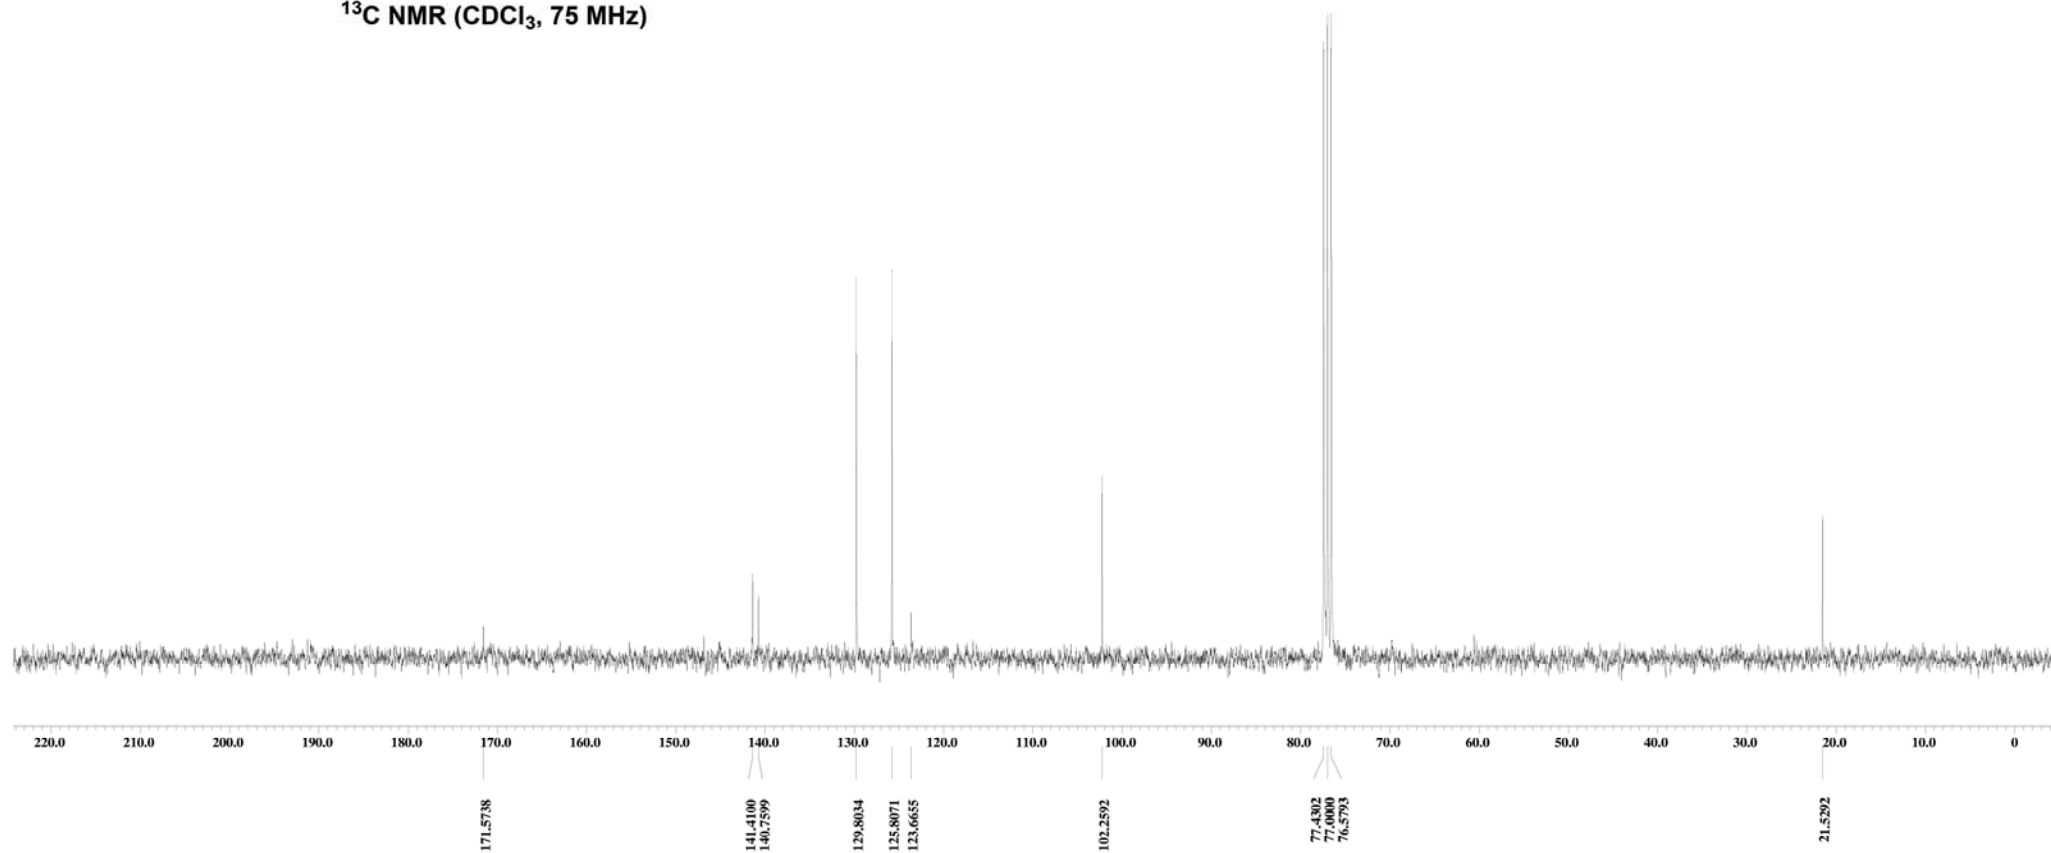

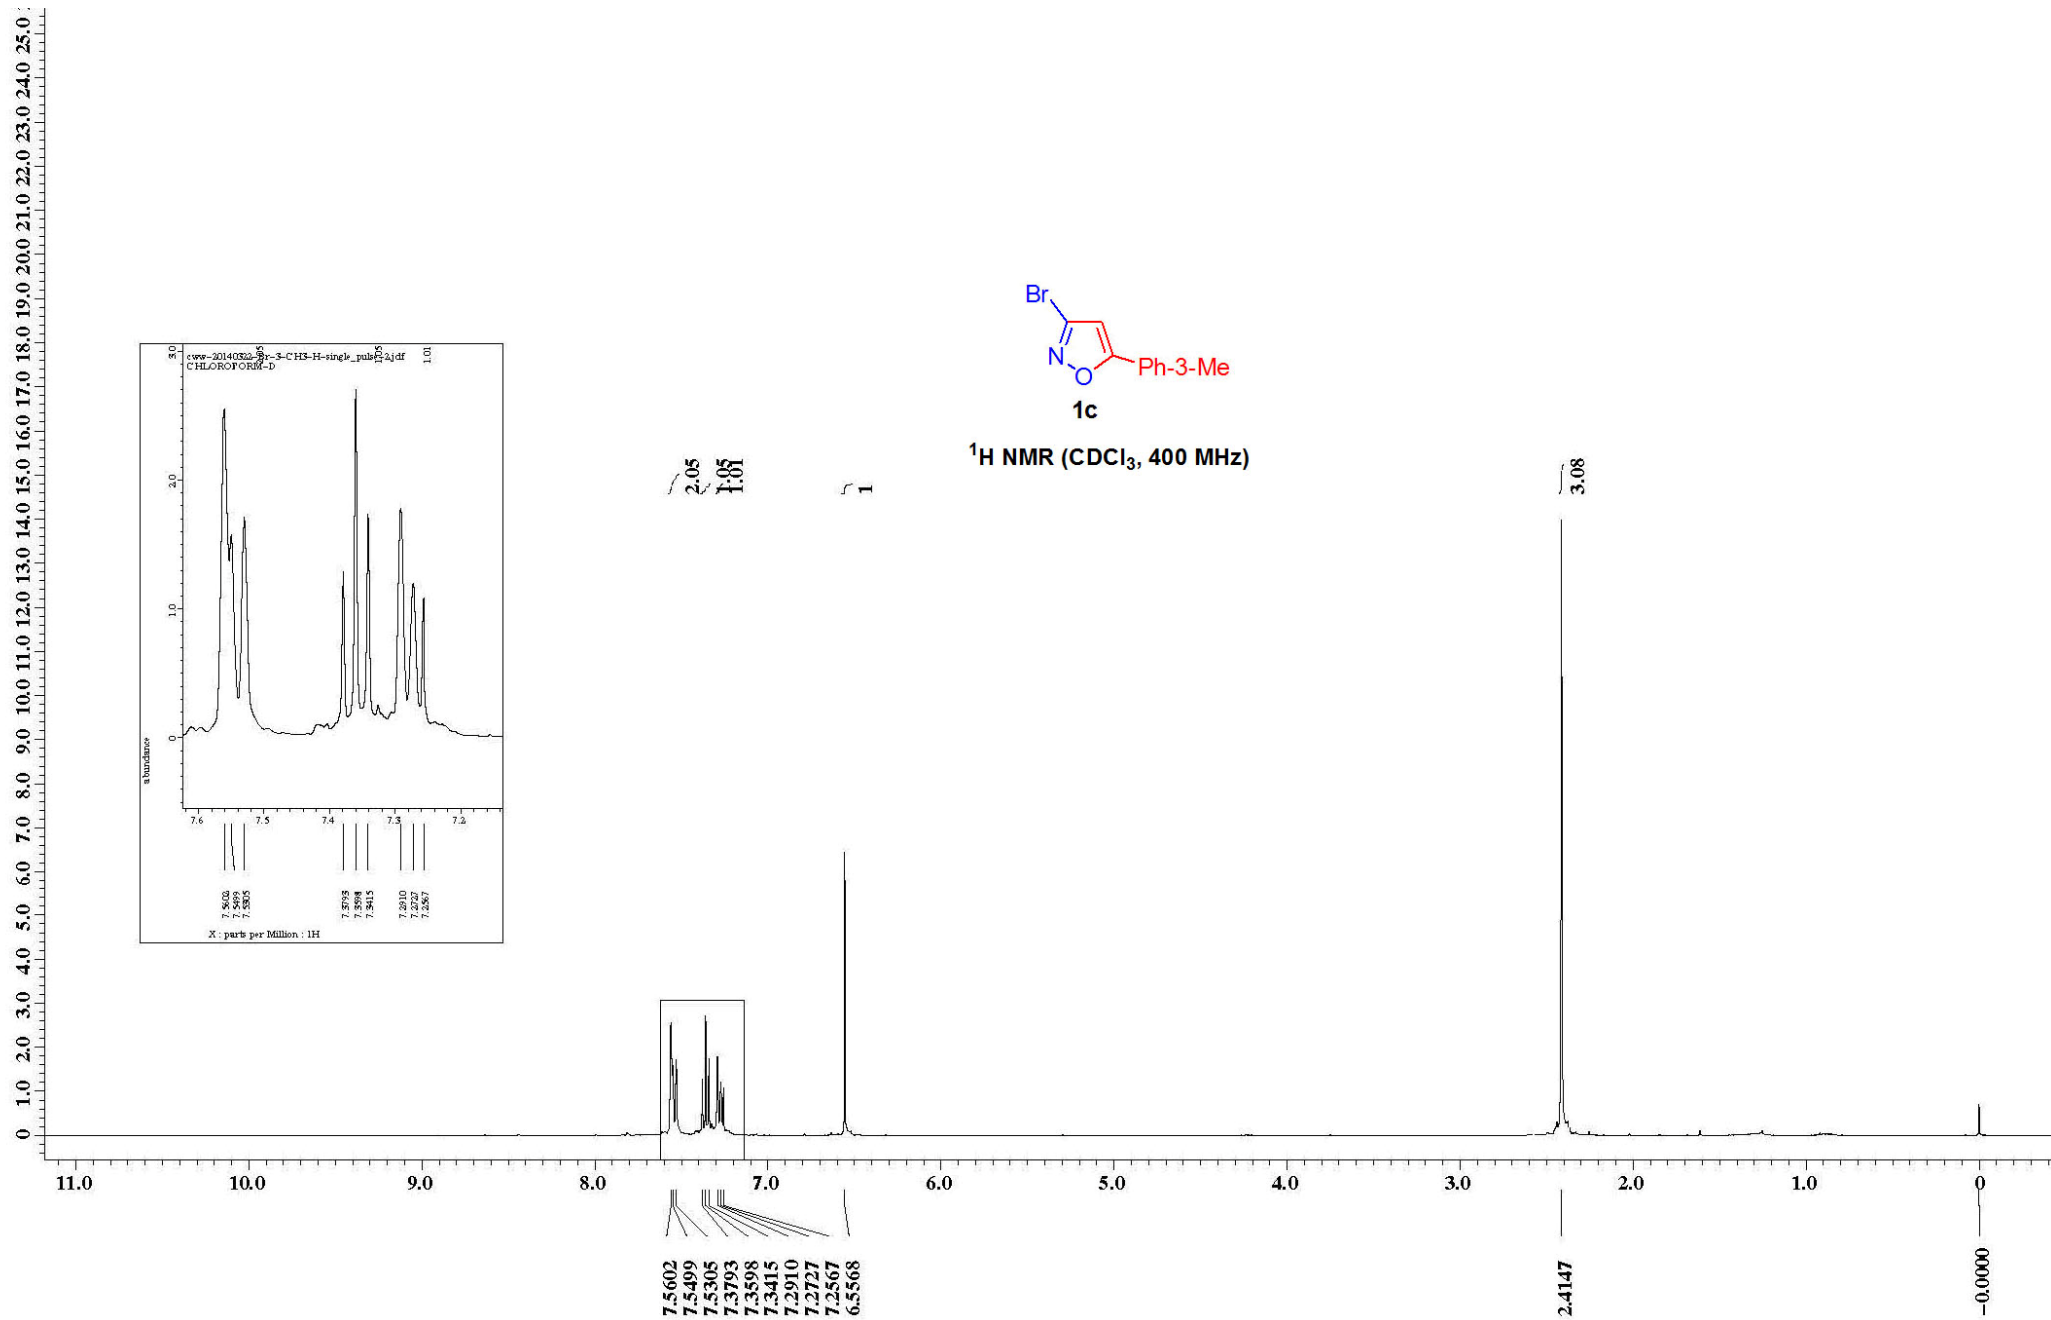



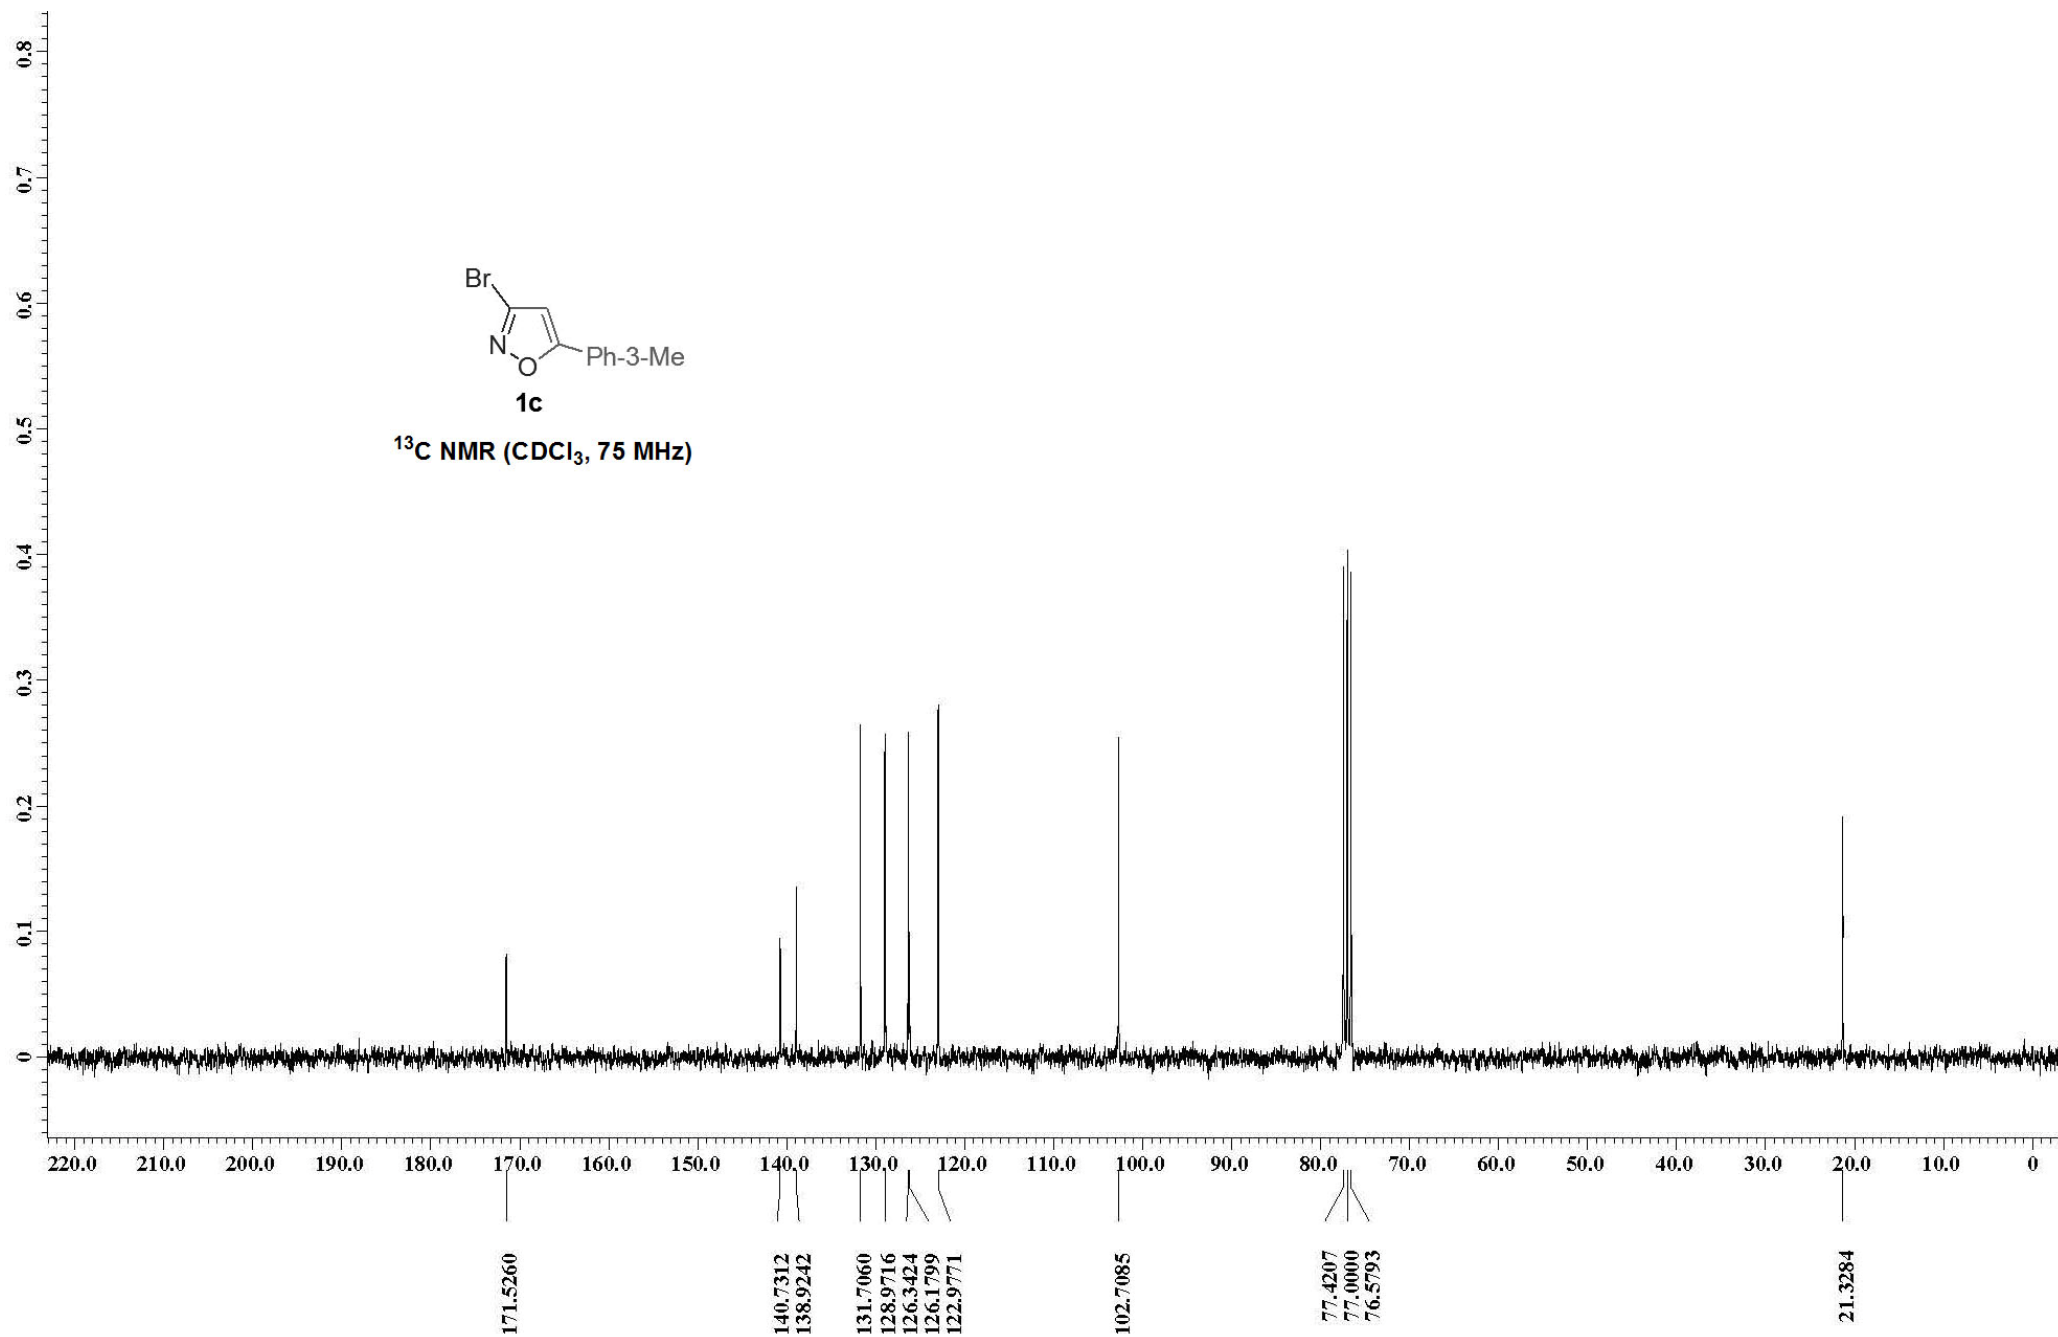

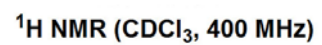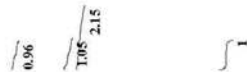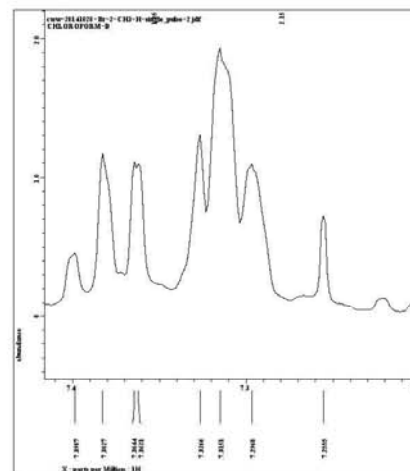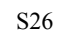

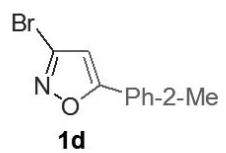

<sup>13</sup>C NMR (CDCl<sub>3</sub>, 100 MHz)

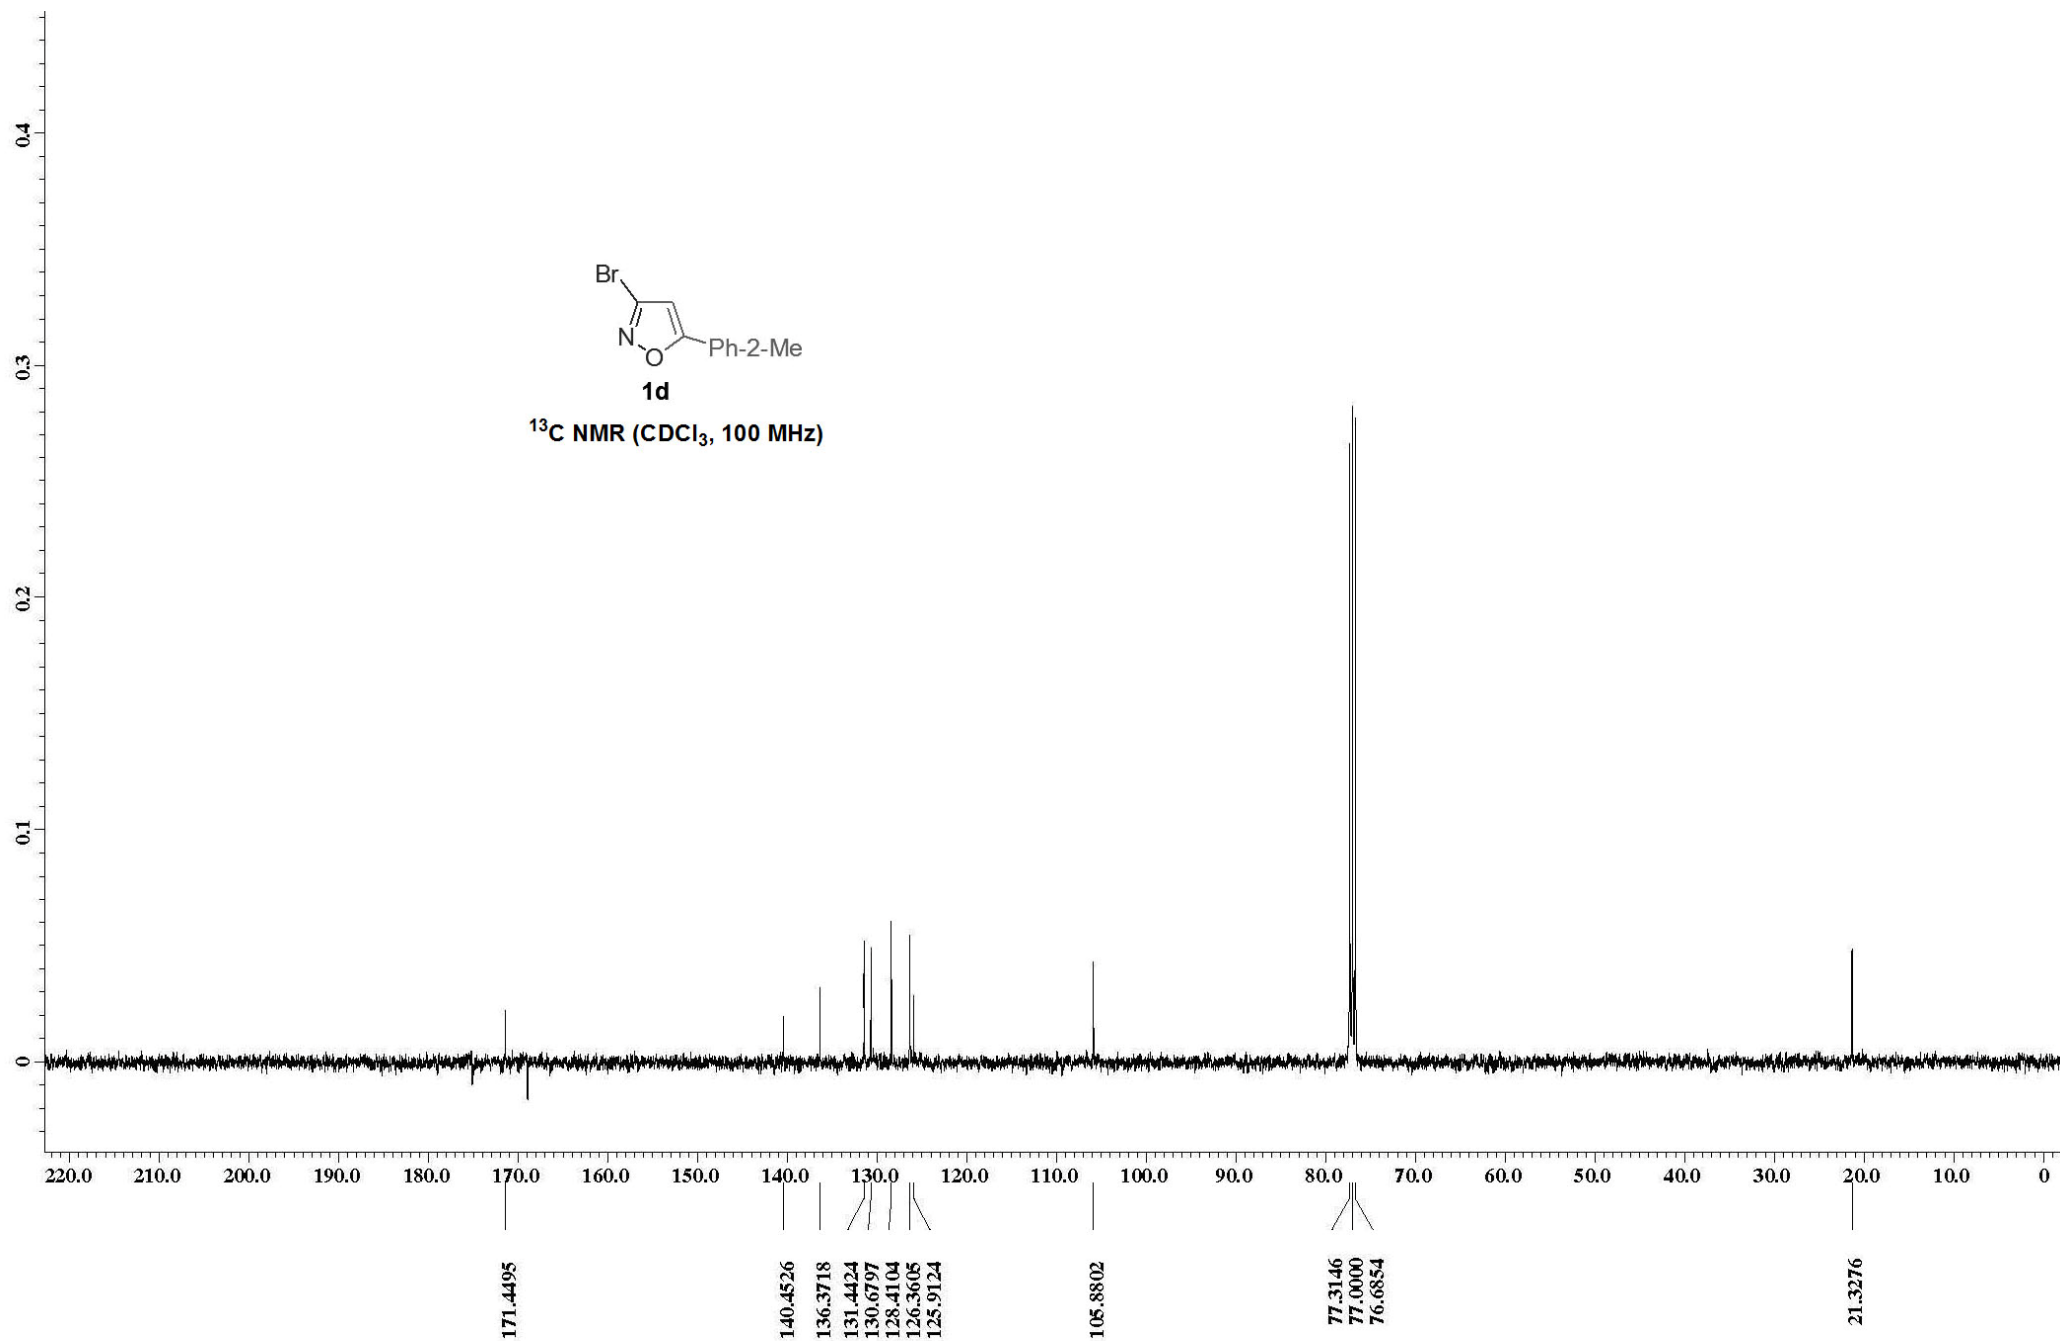

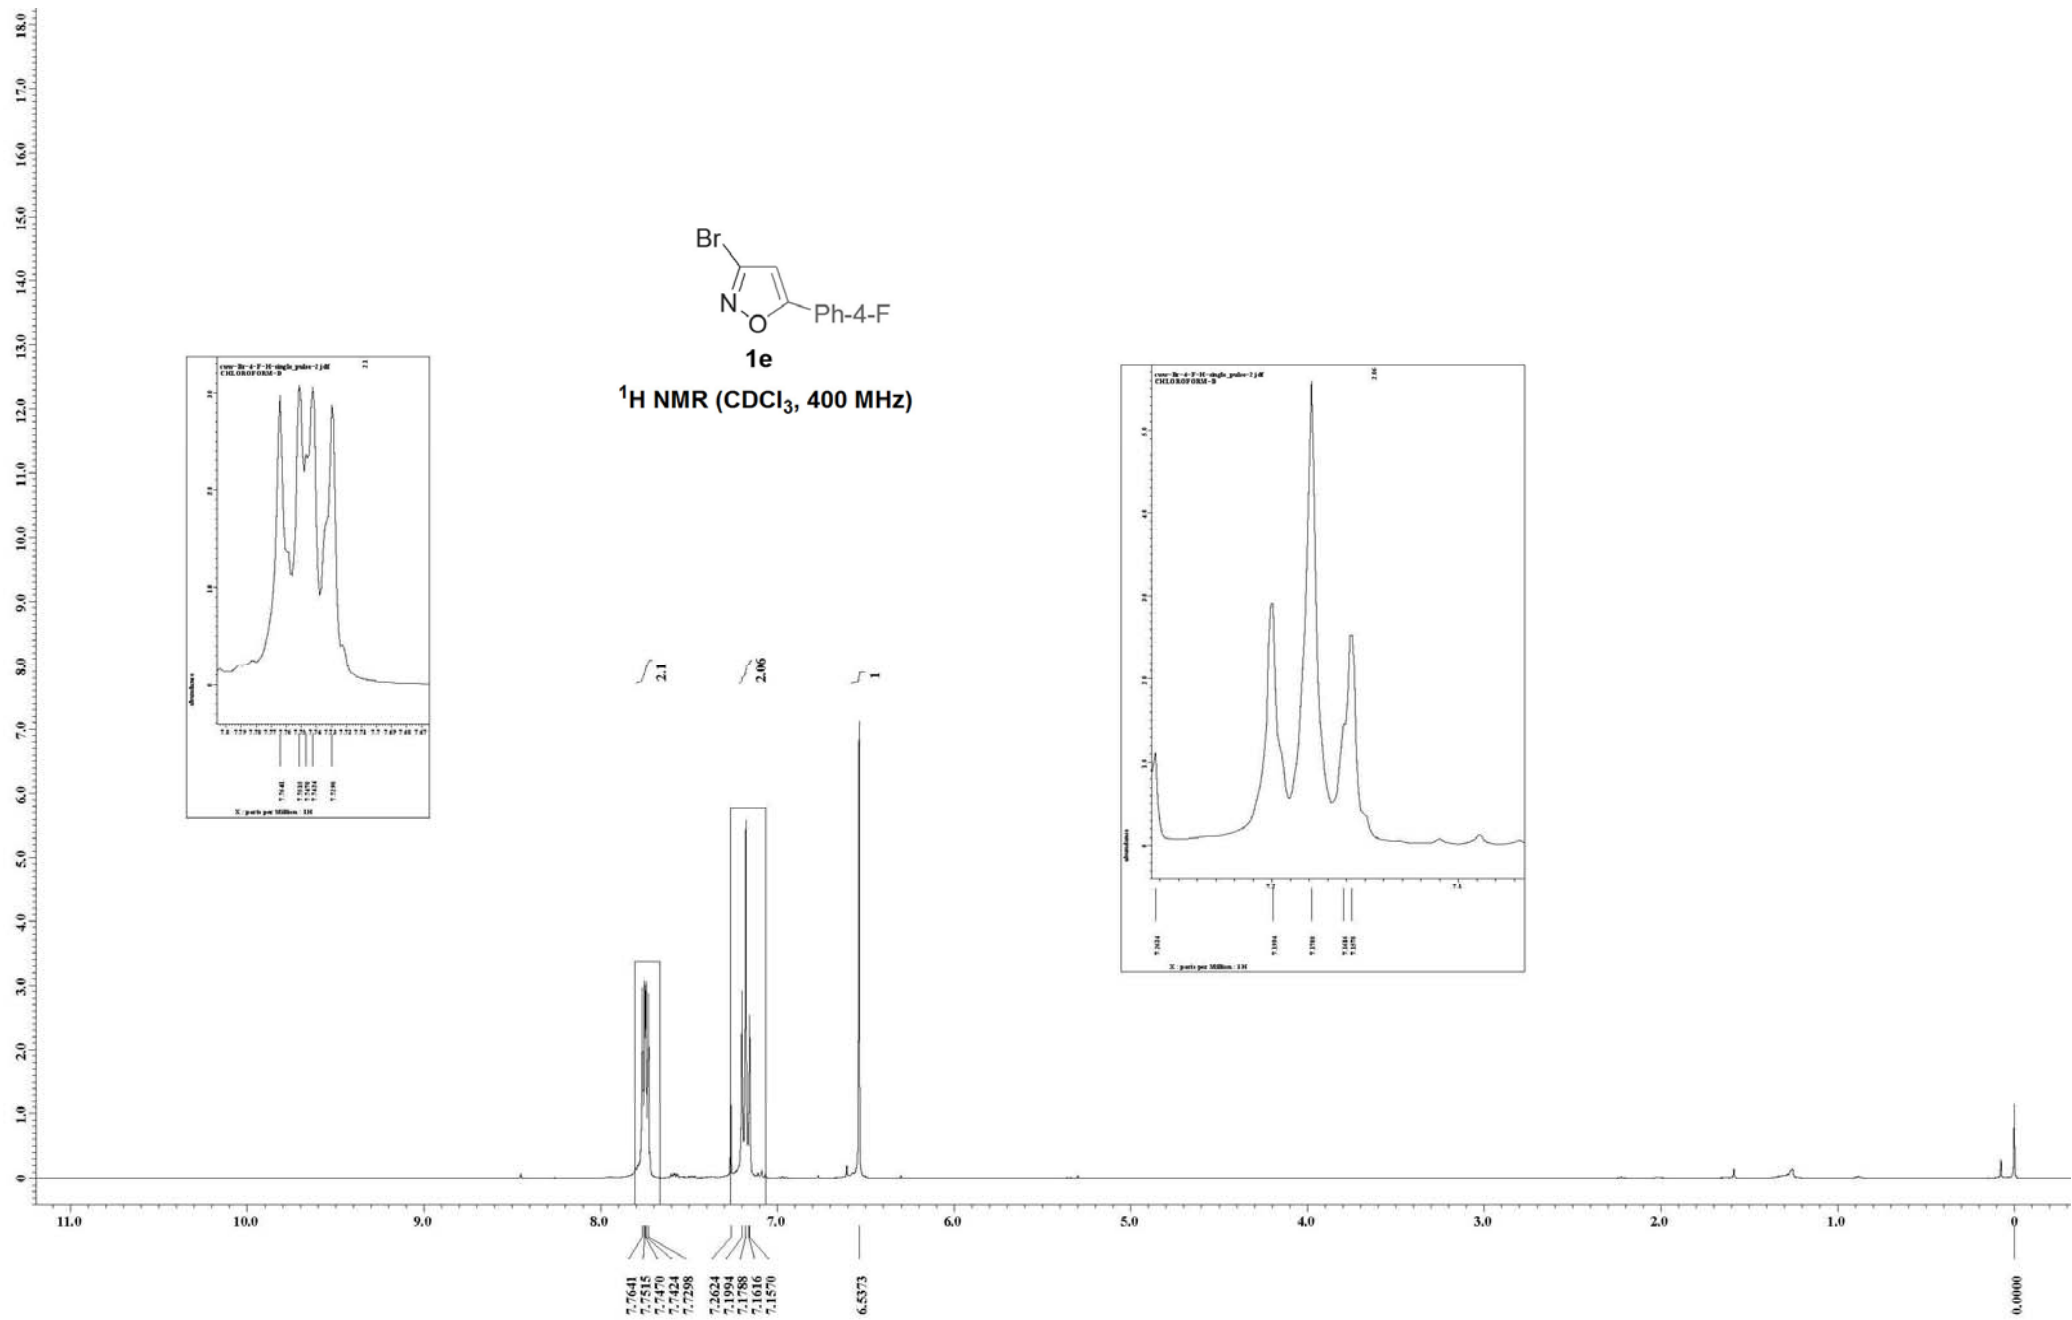

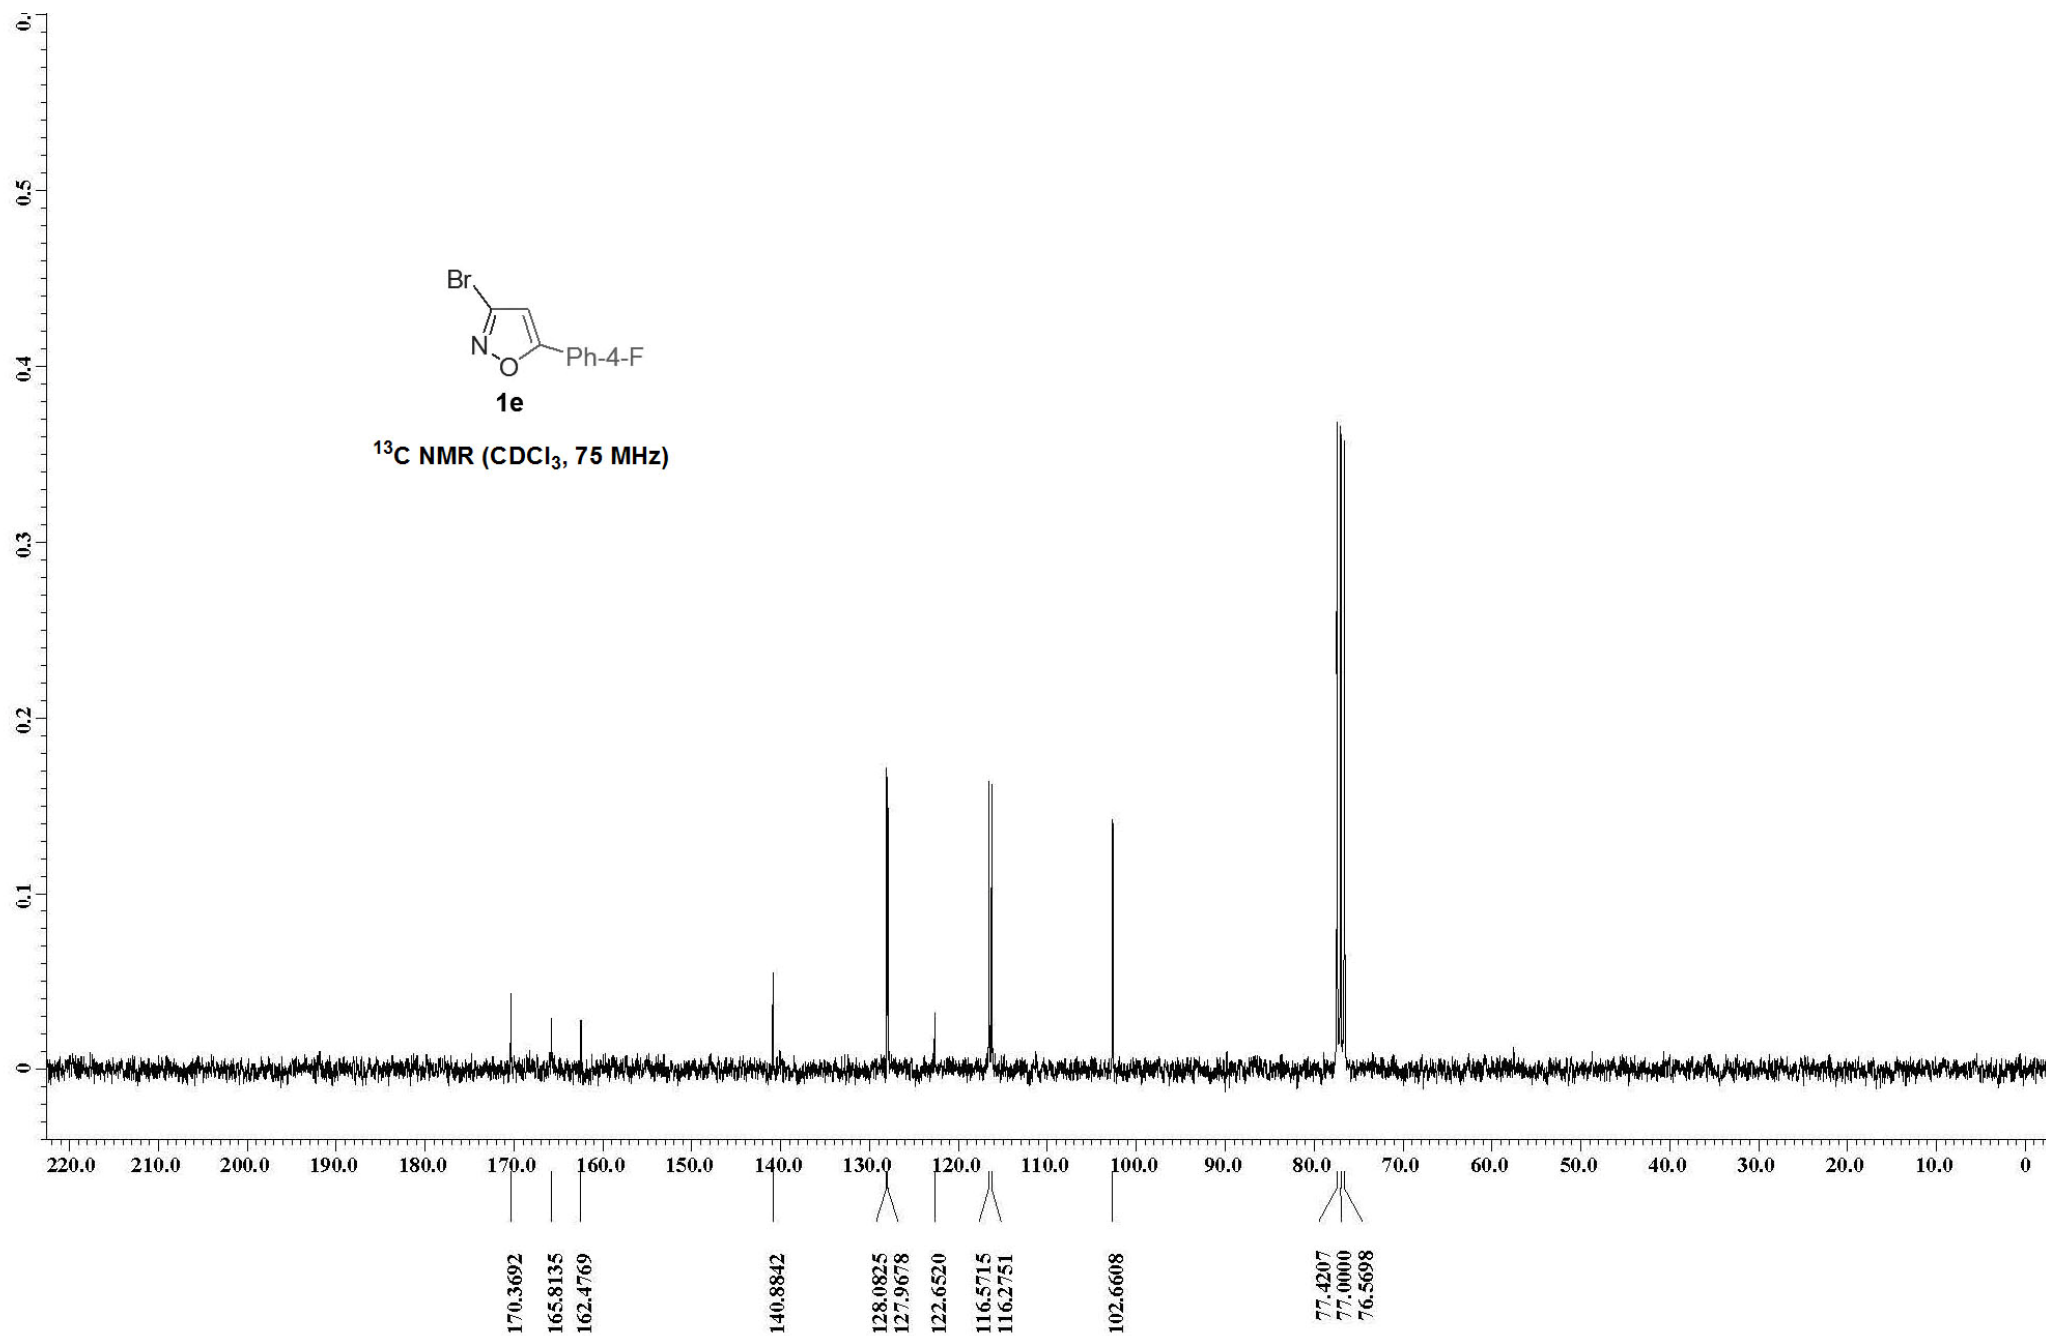

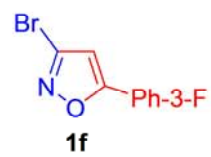

<sup>1</sup>H NMR (CDCl<sub>3</sub>, 300 MHz)

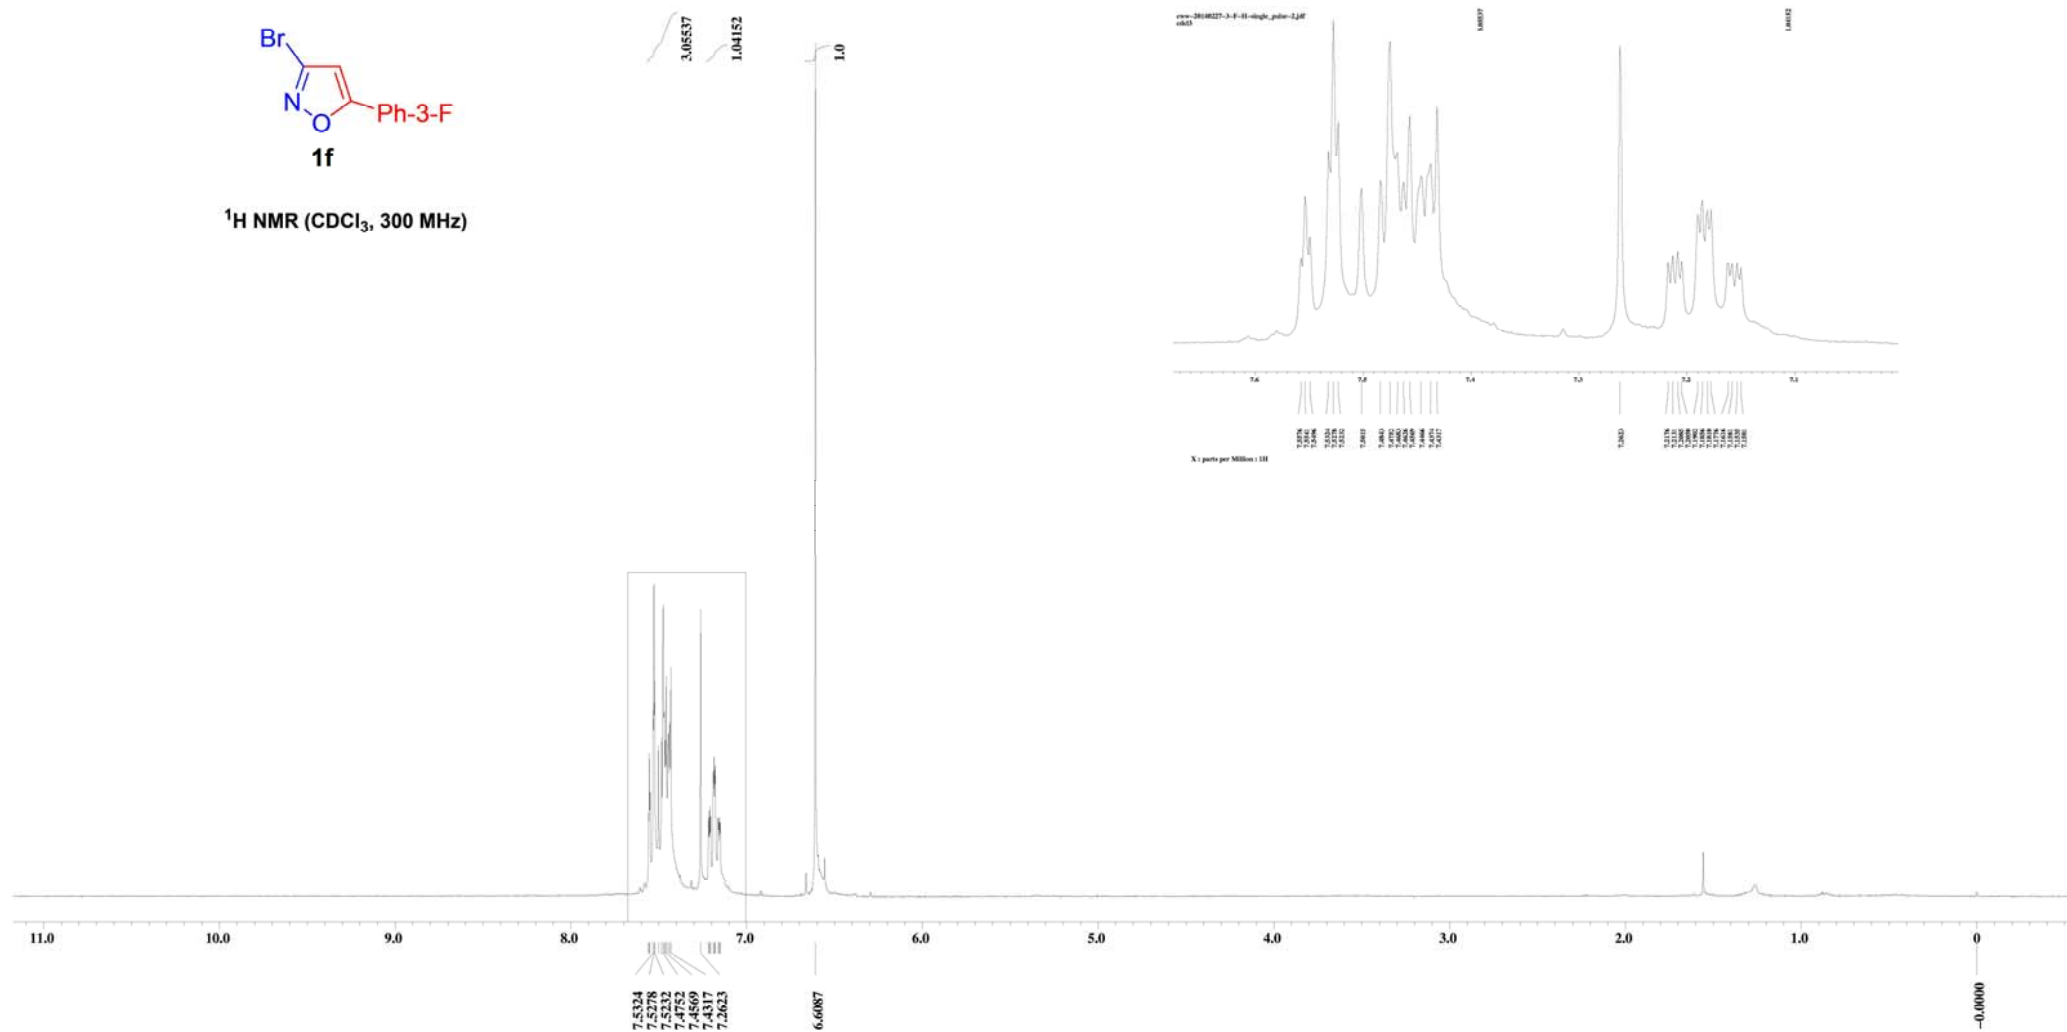

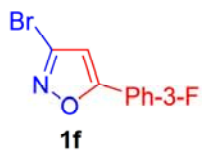

$^{13}\text{C}$  NMR ( $\text{CDCl}_3$ , 75 MHz)

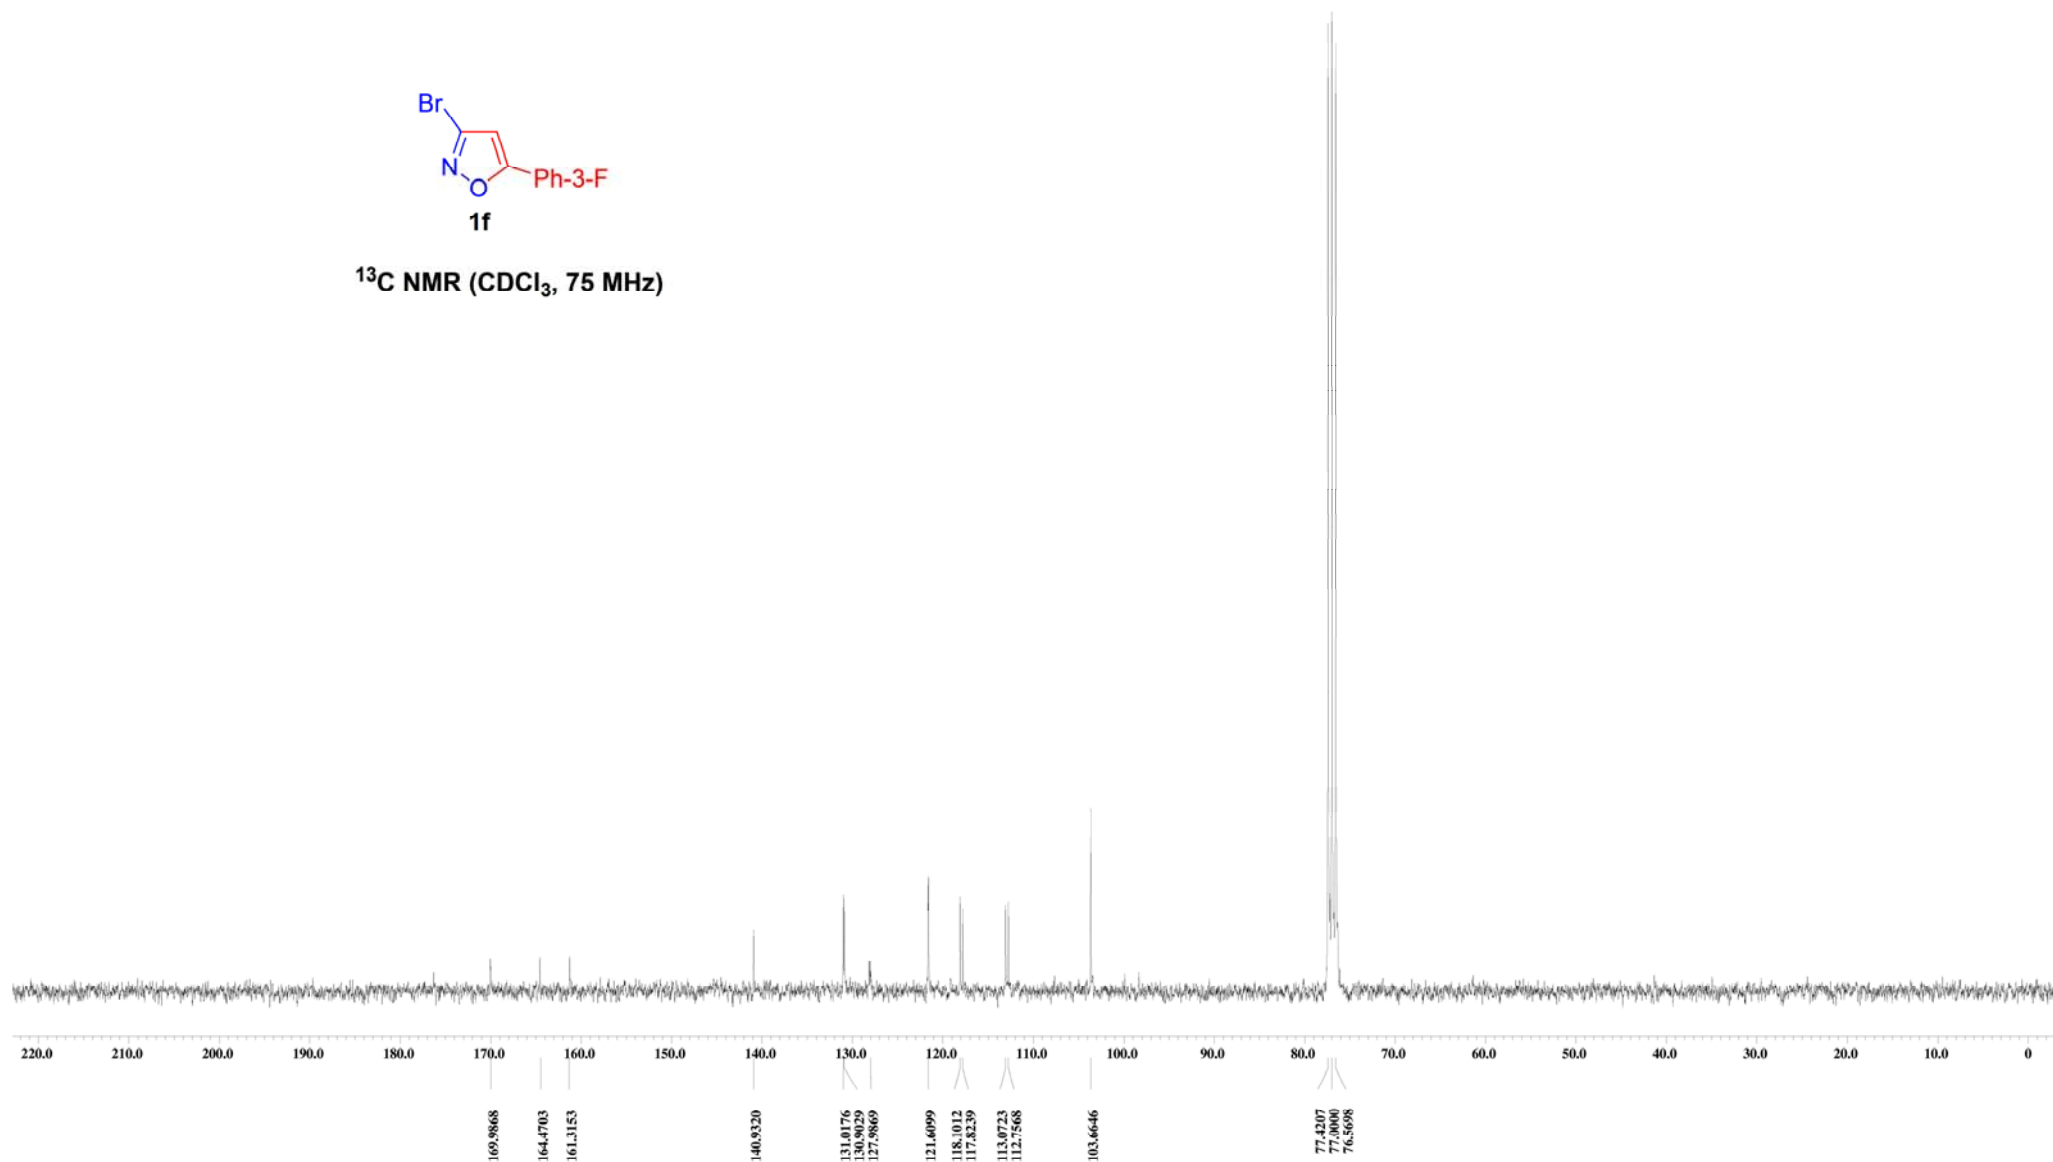

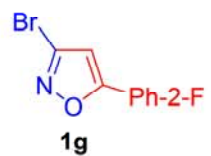

$^1\text{H}$  NMR ( $\text{CDCl}_3$ , 300 MHz)

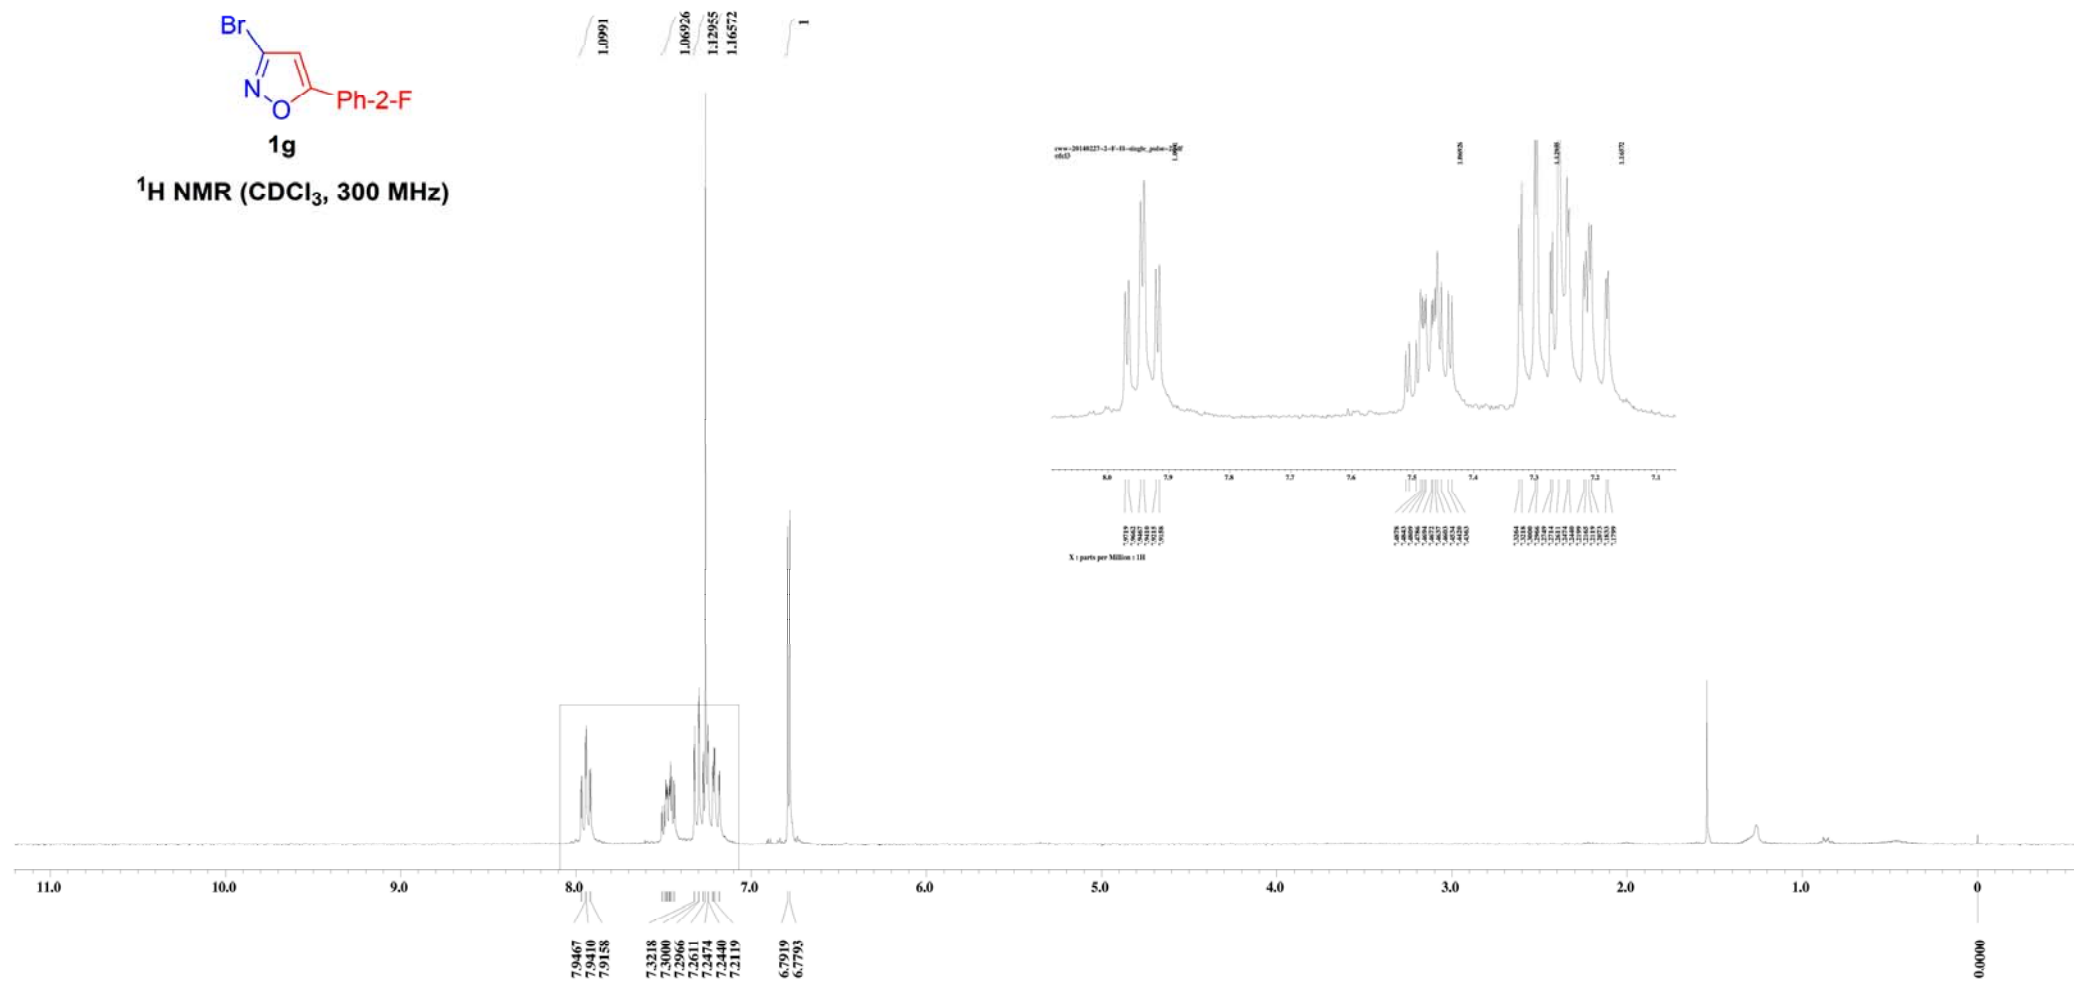



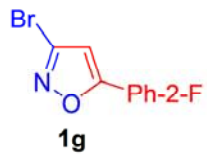

$^{13}\text{C}$  NMR ( $\text{CDCl}_3$ , 75 MHz)

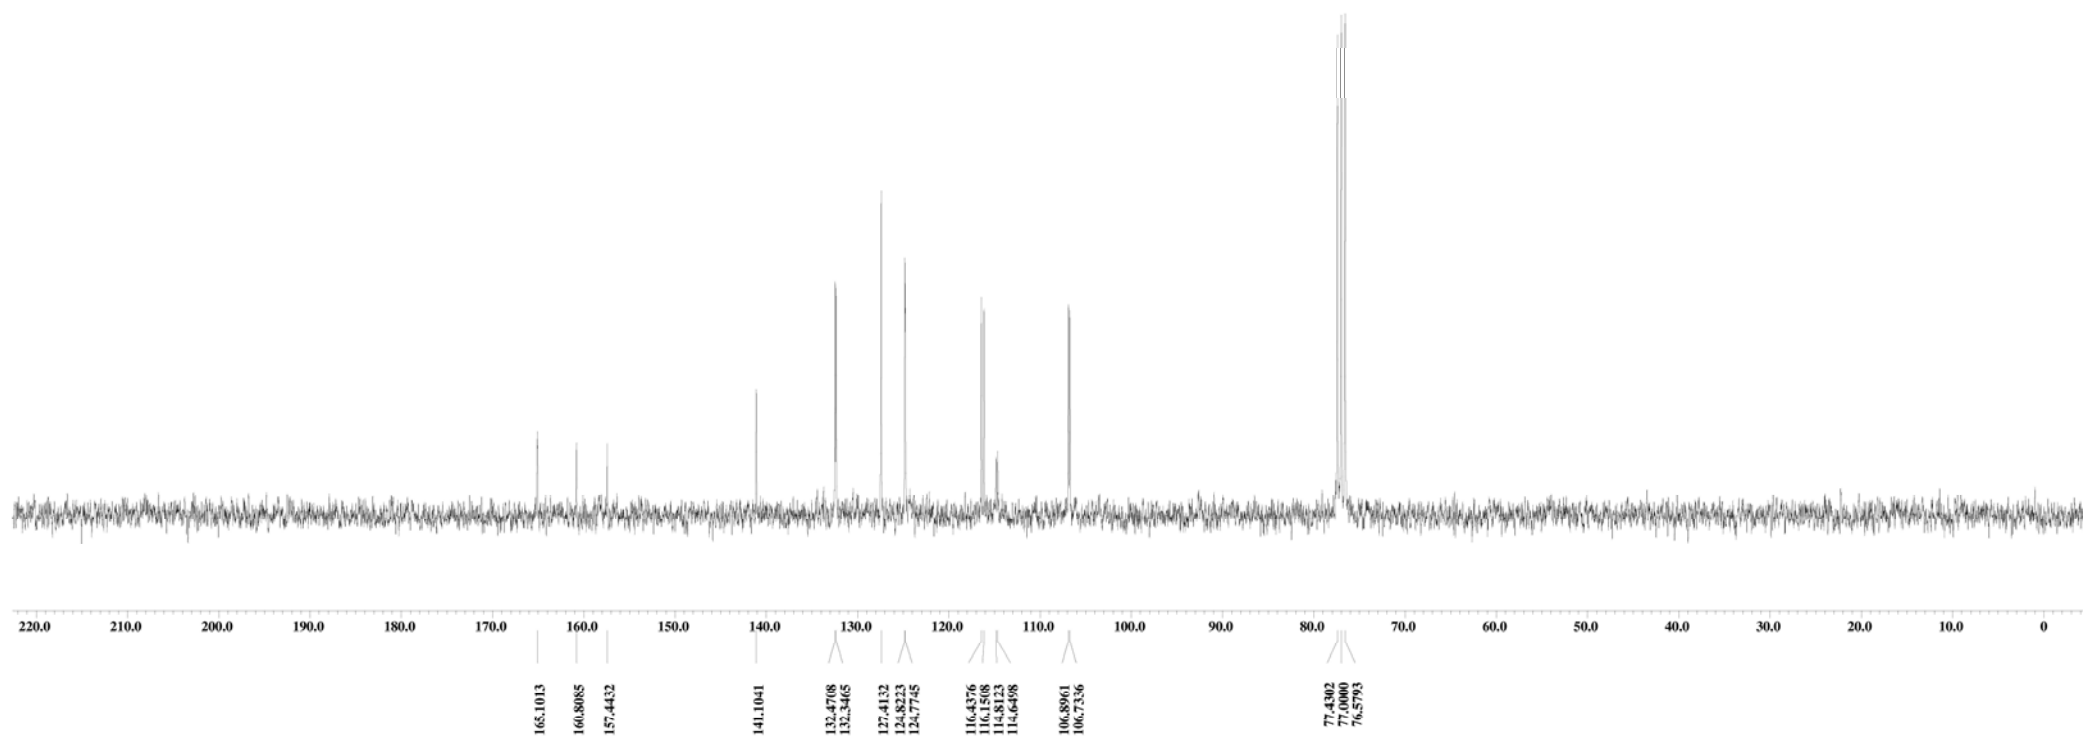

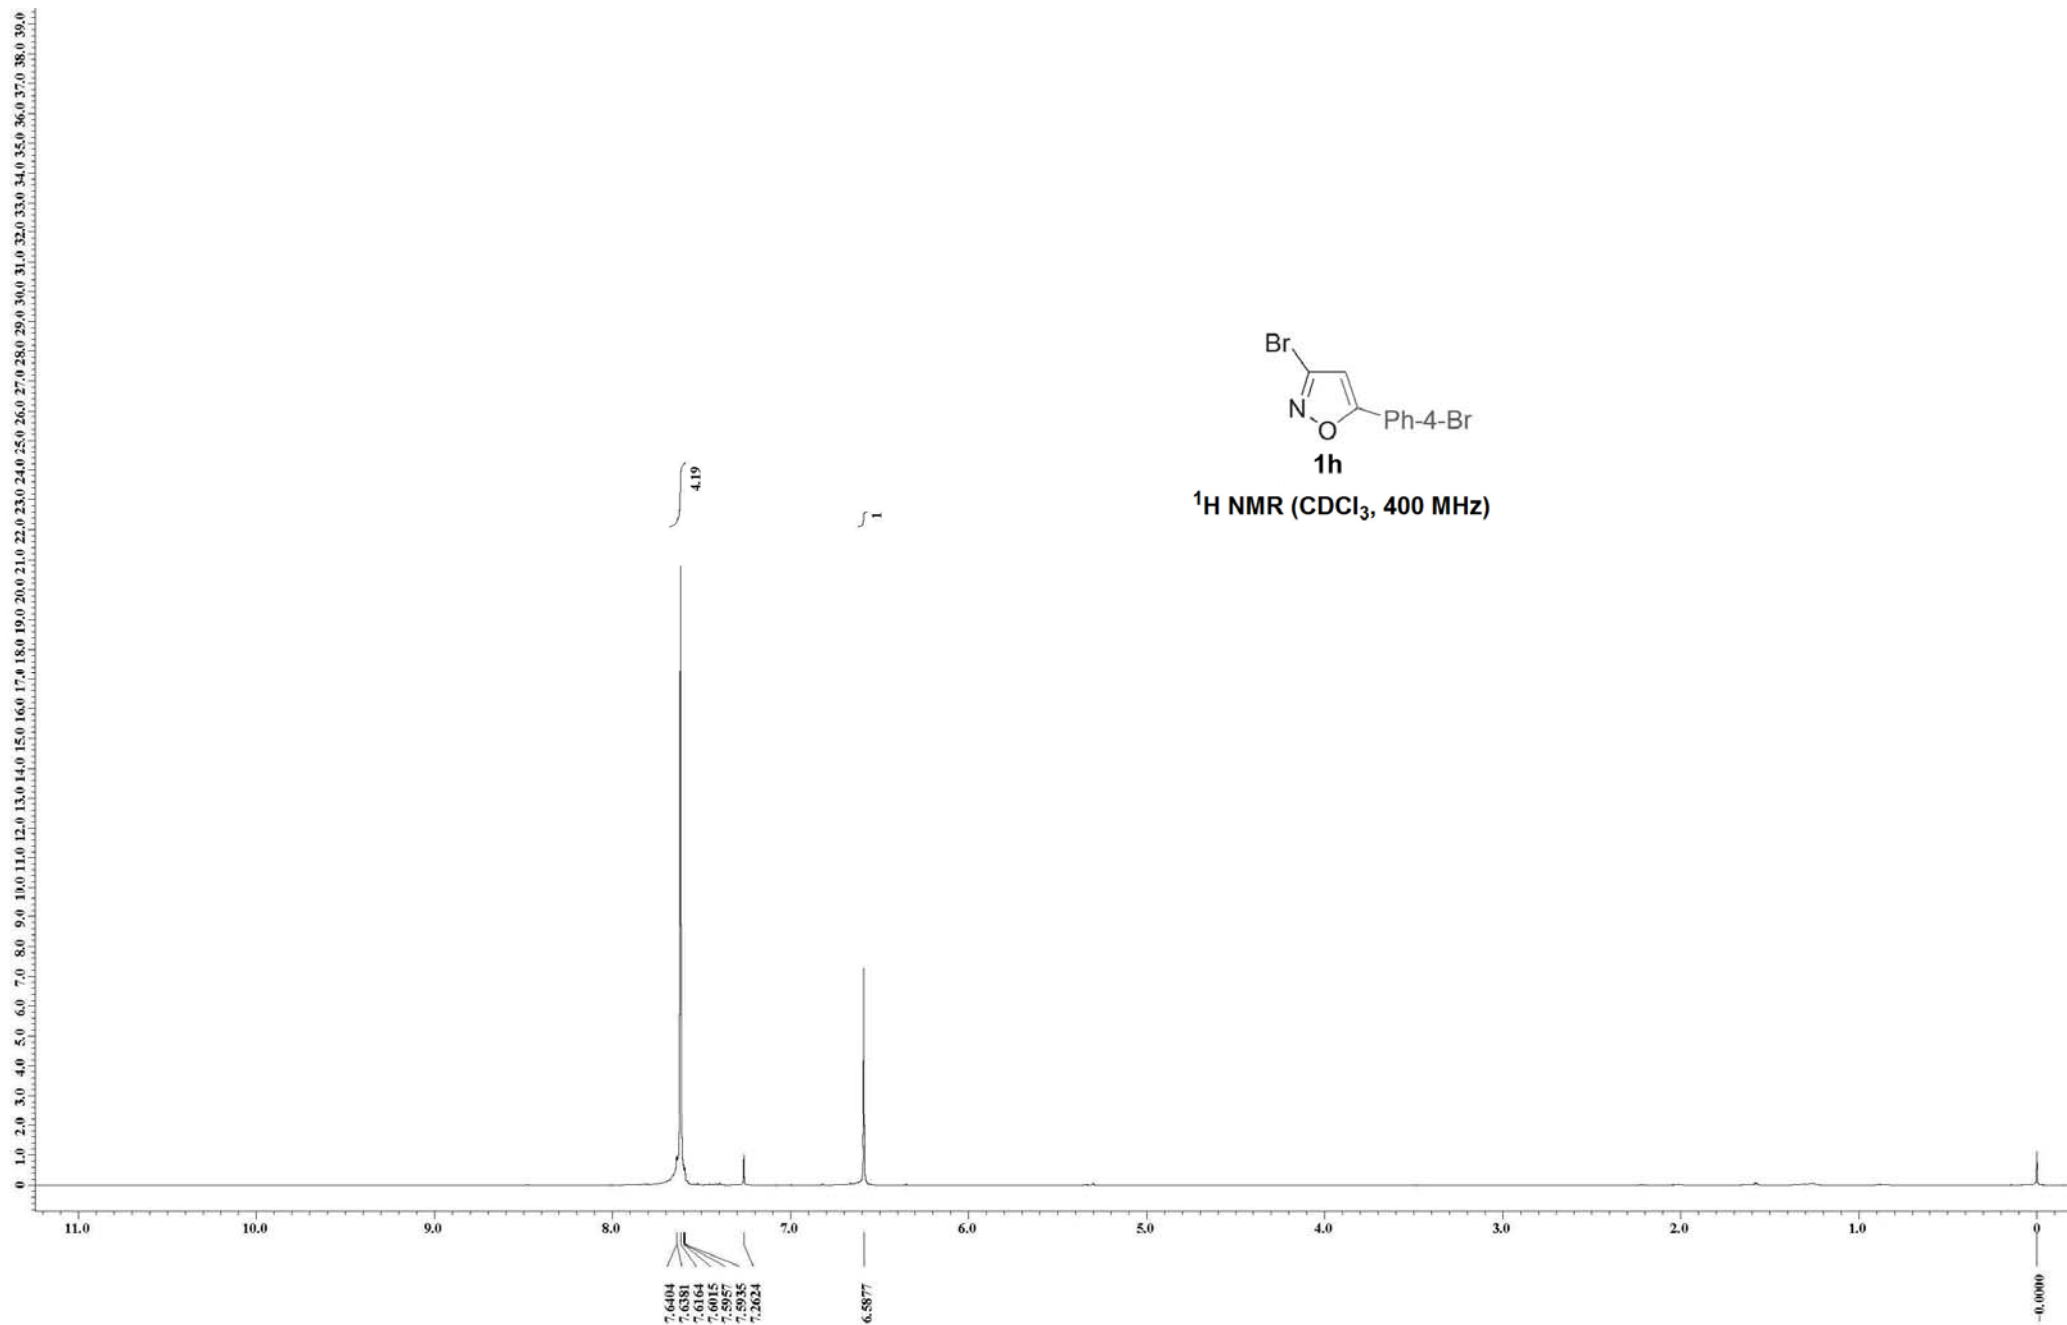

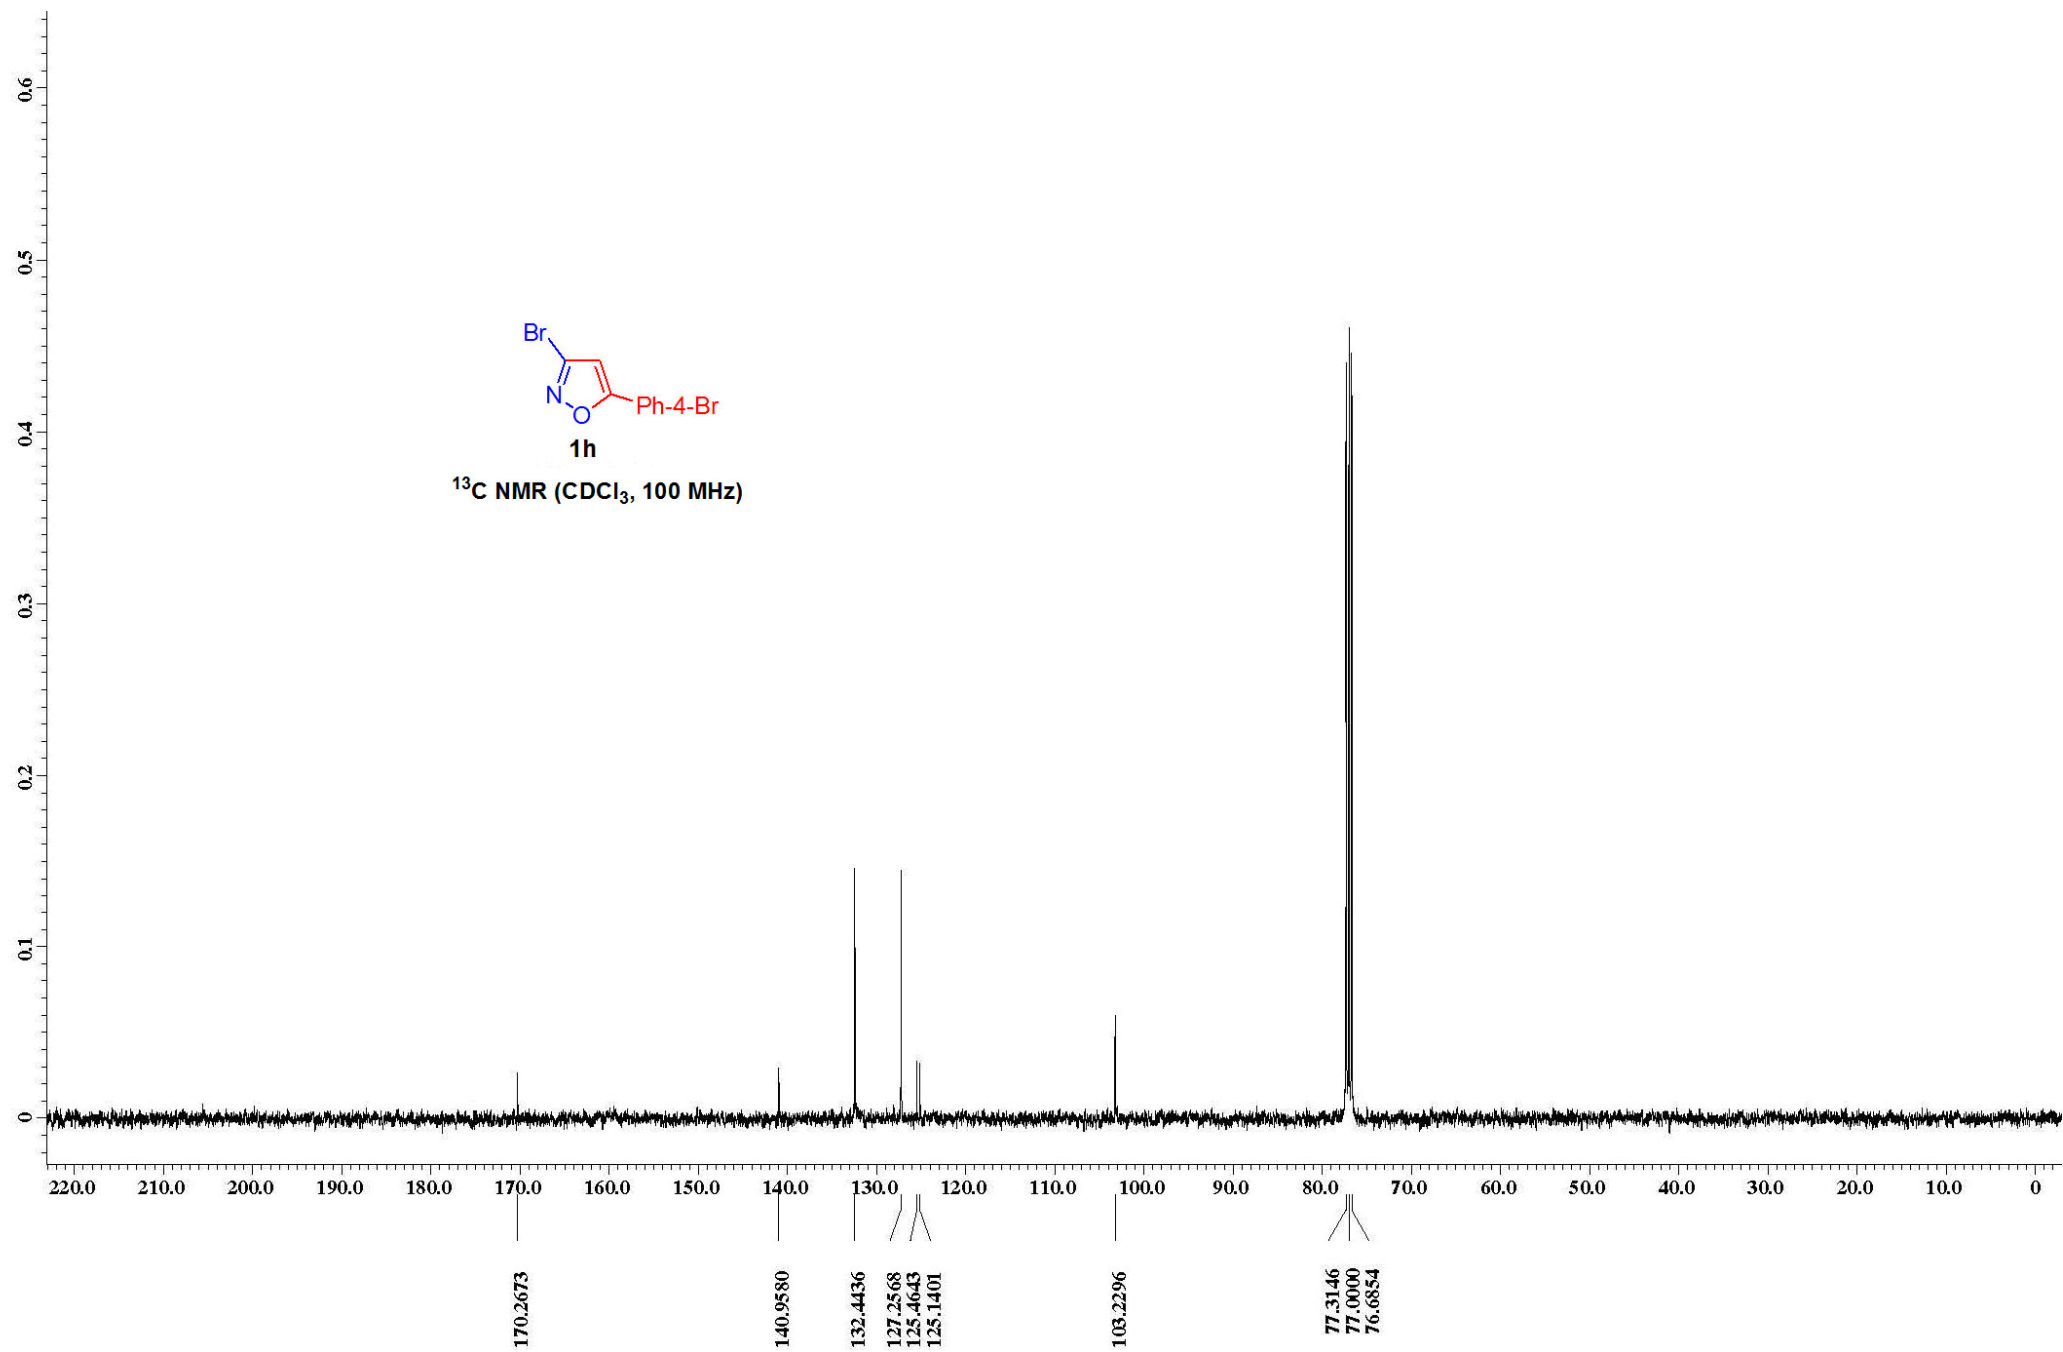

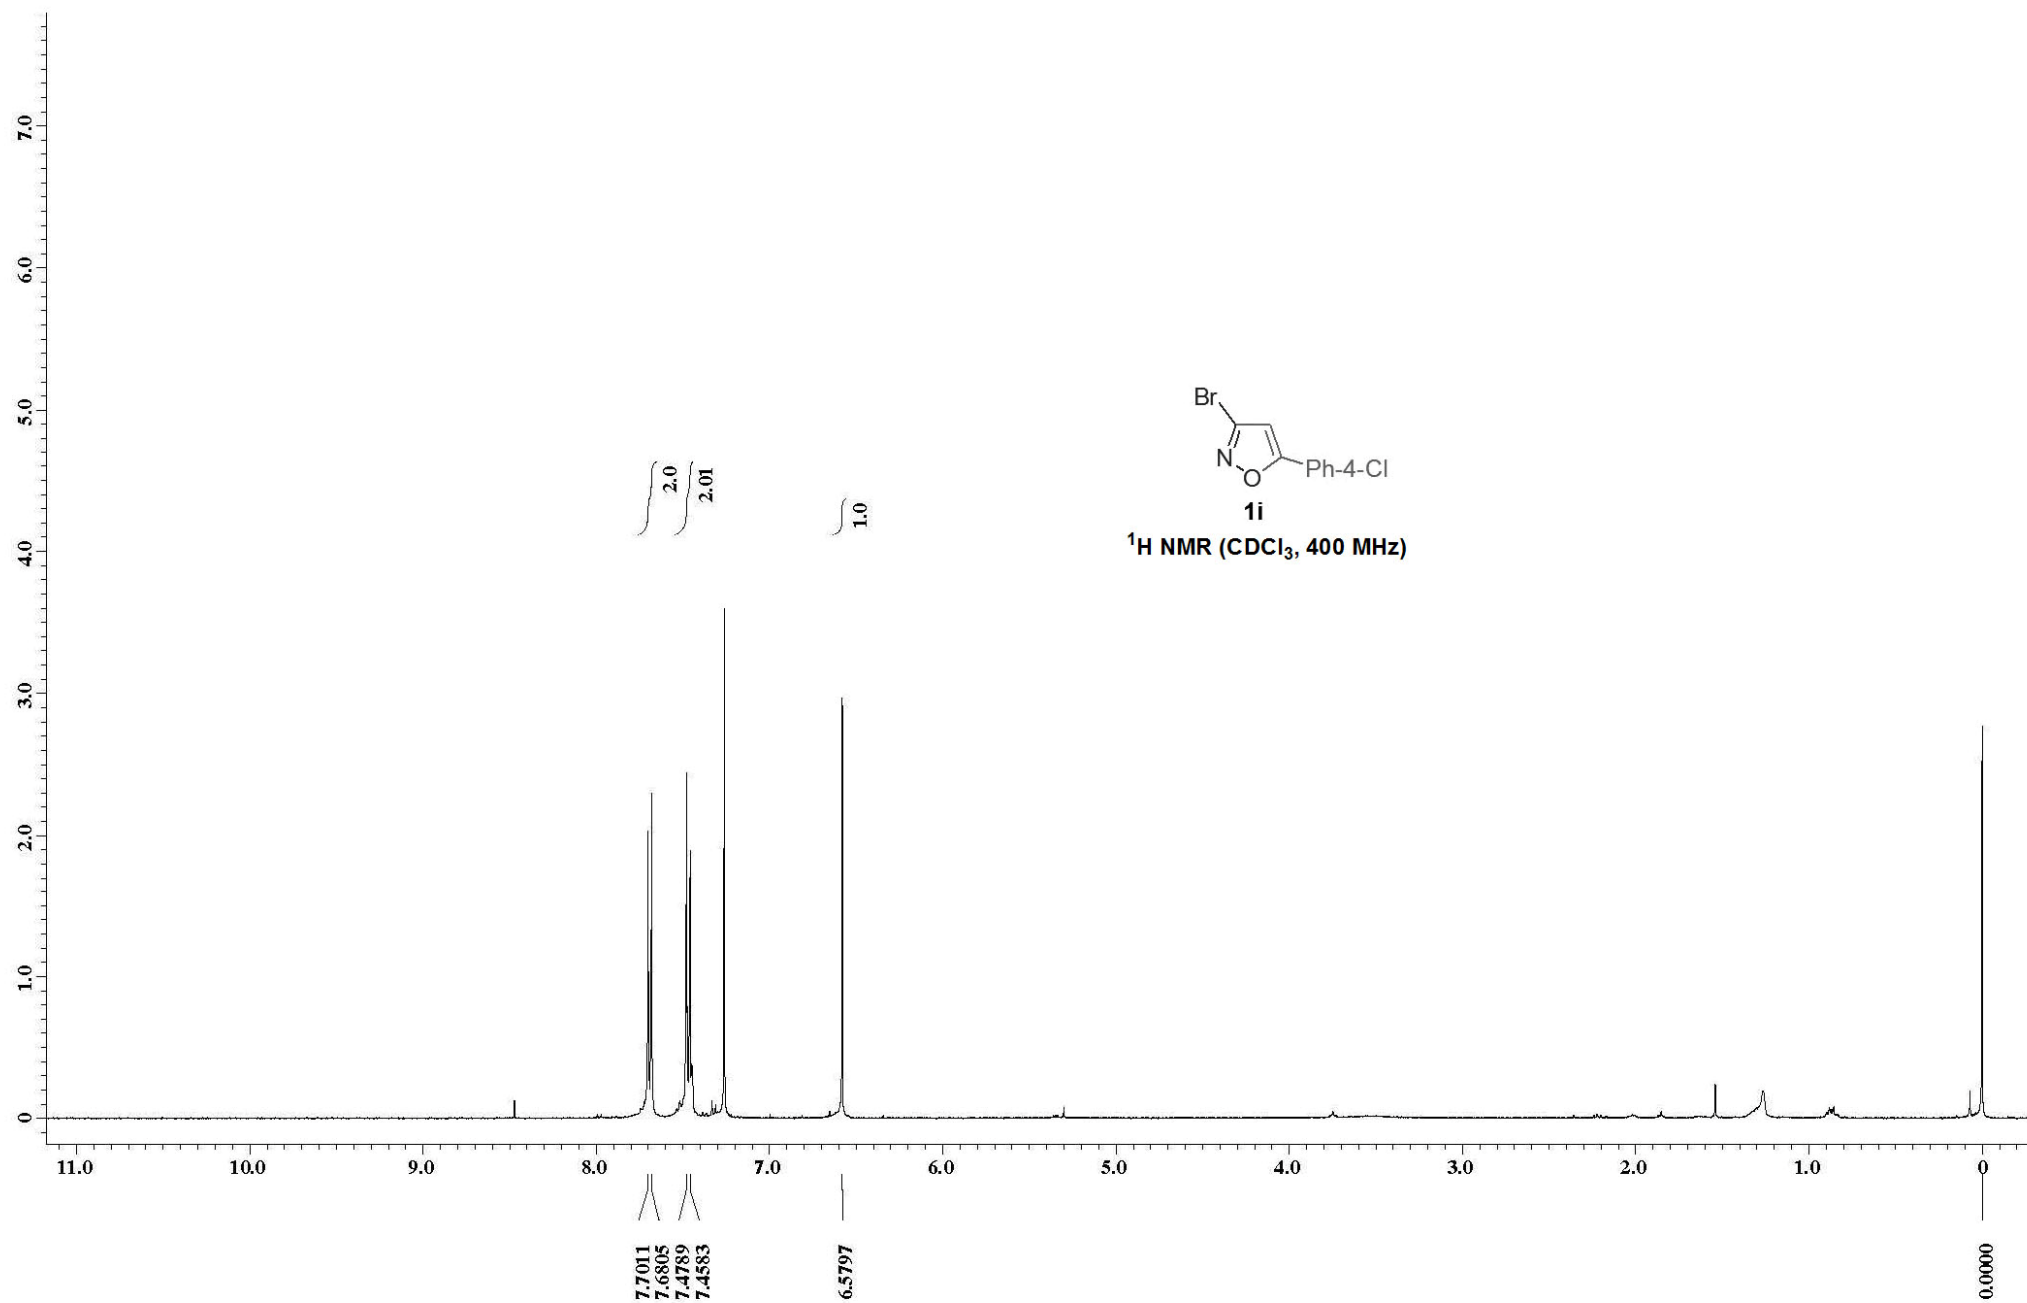

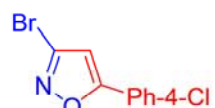

1i

$^{13}\text{C}$  NMR ( $\text{CDCl}_3$ , 75 MHz)

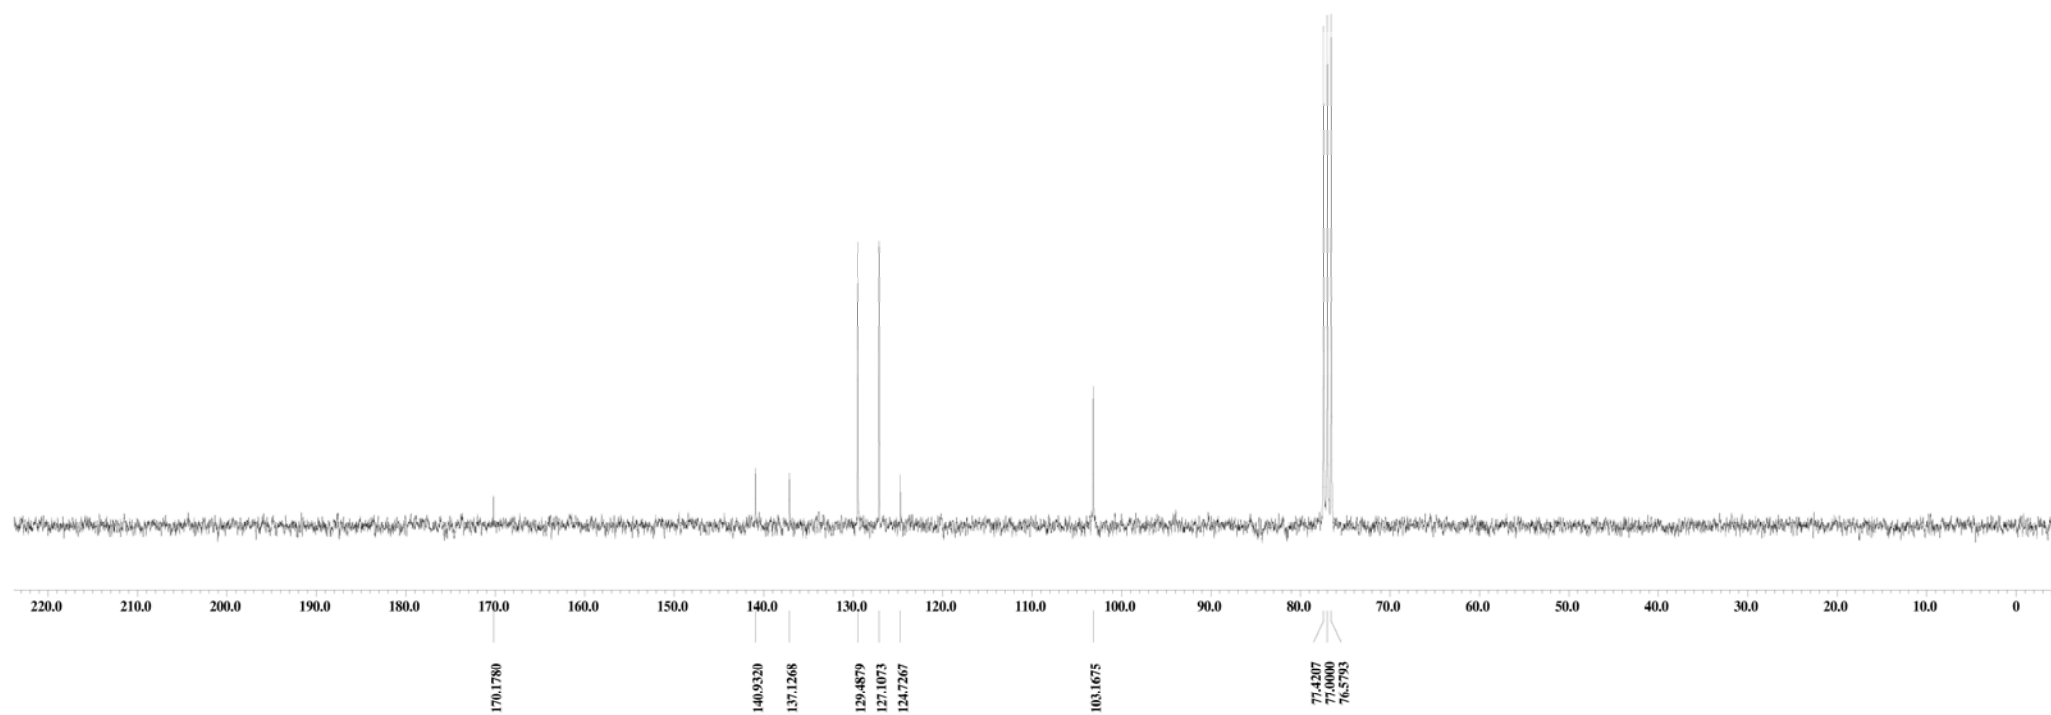

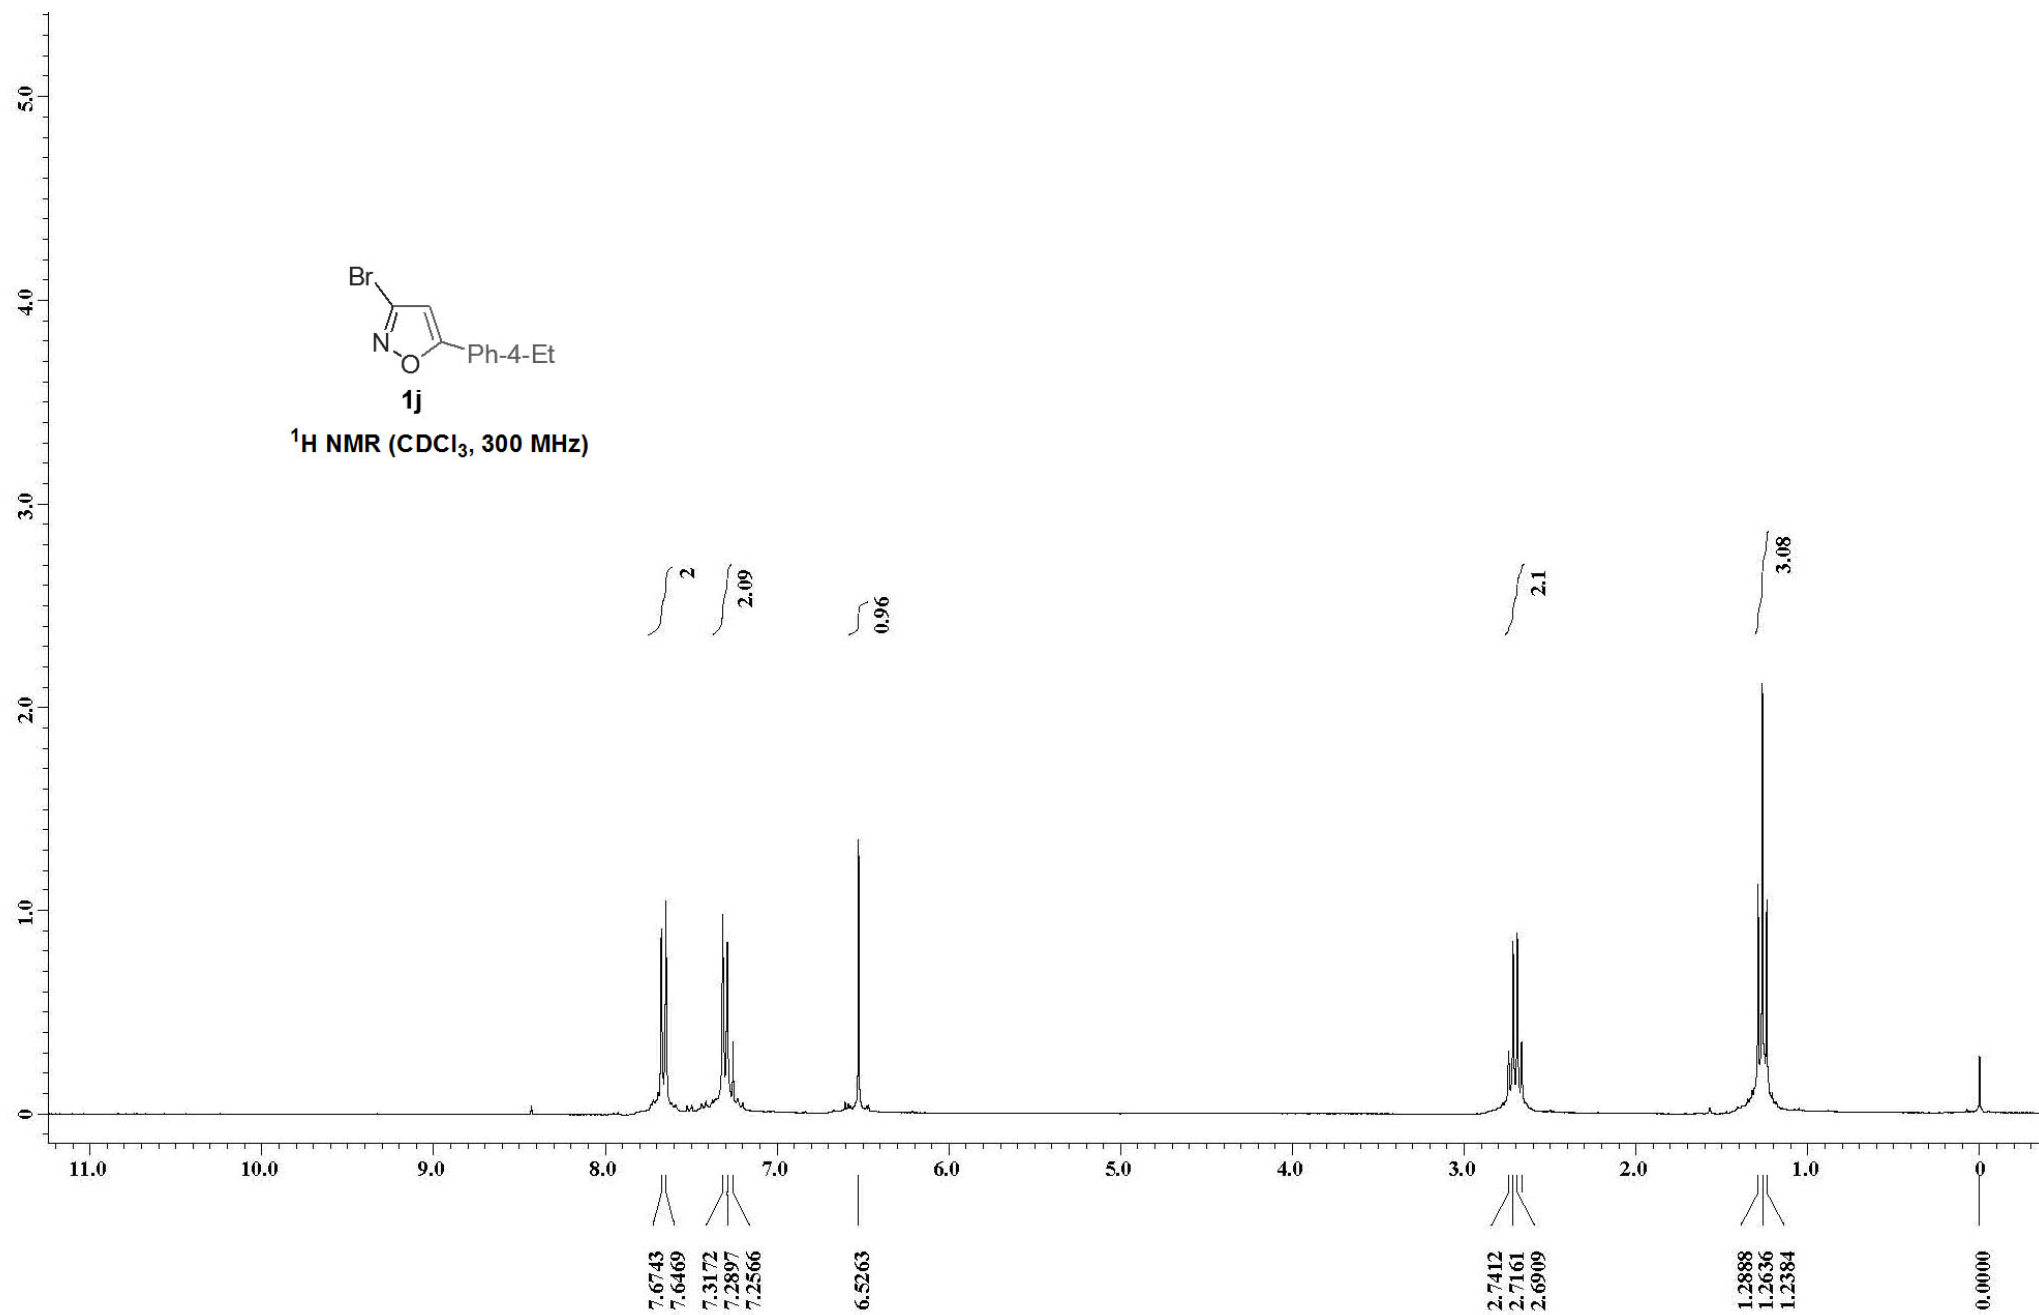

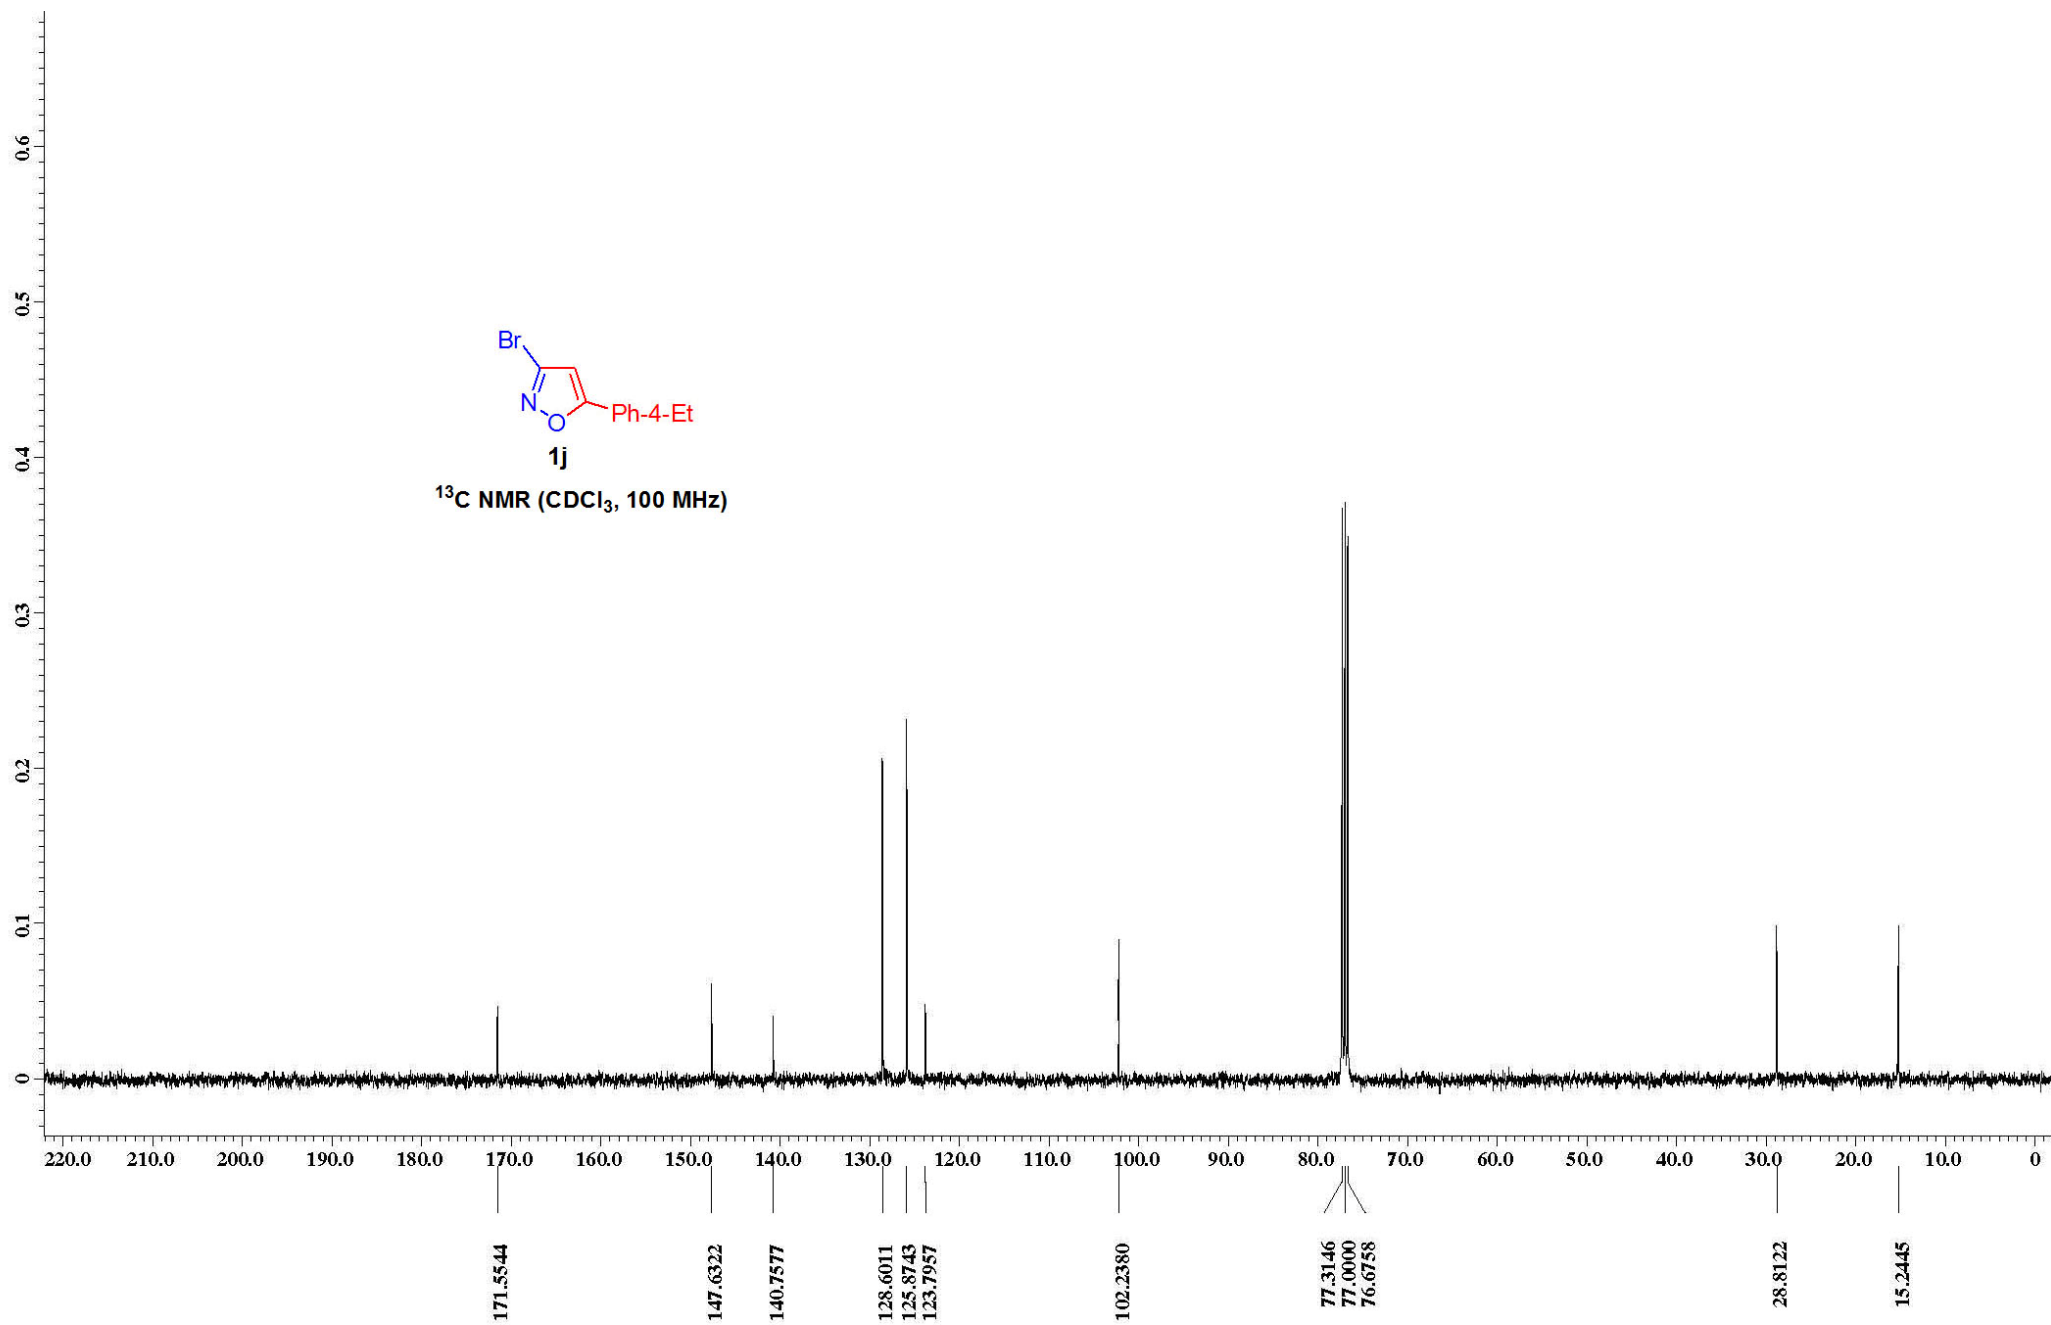

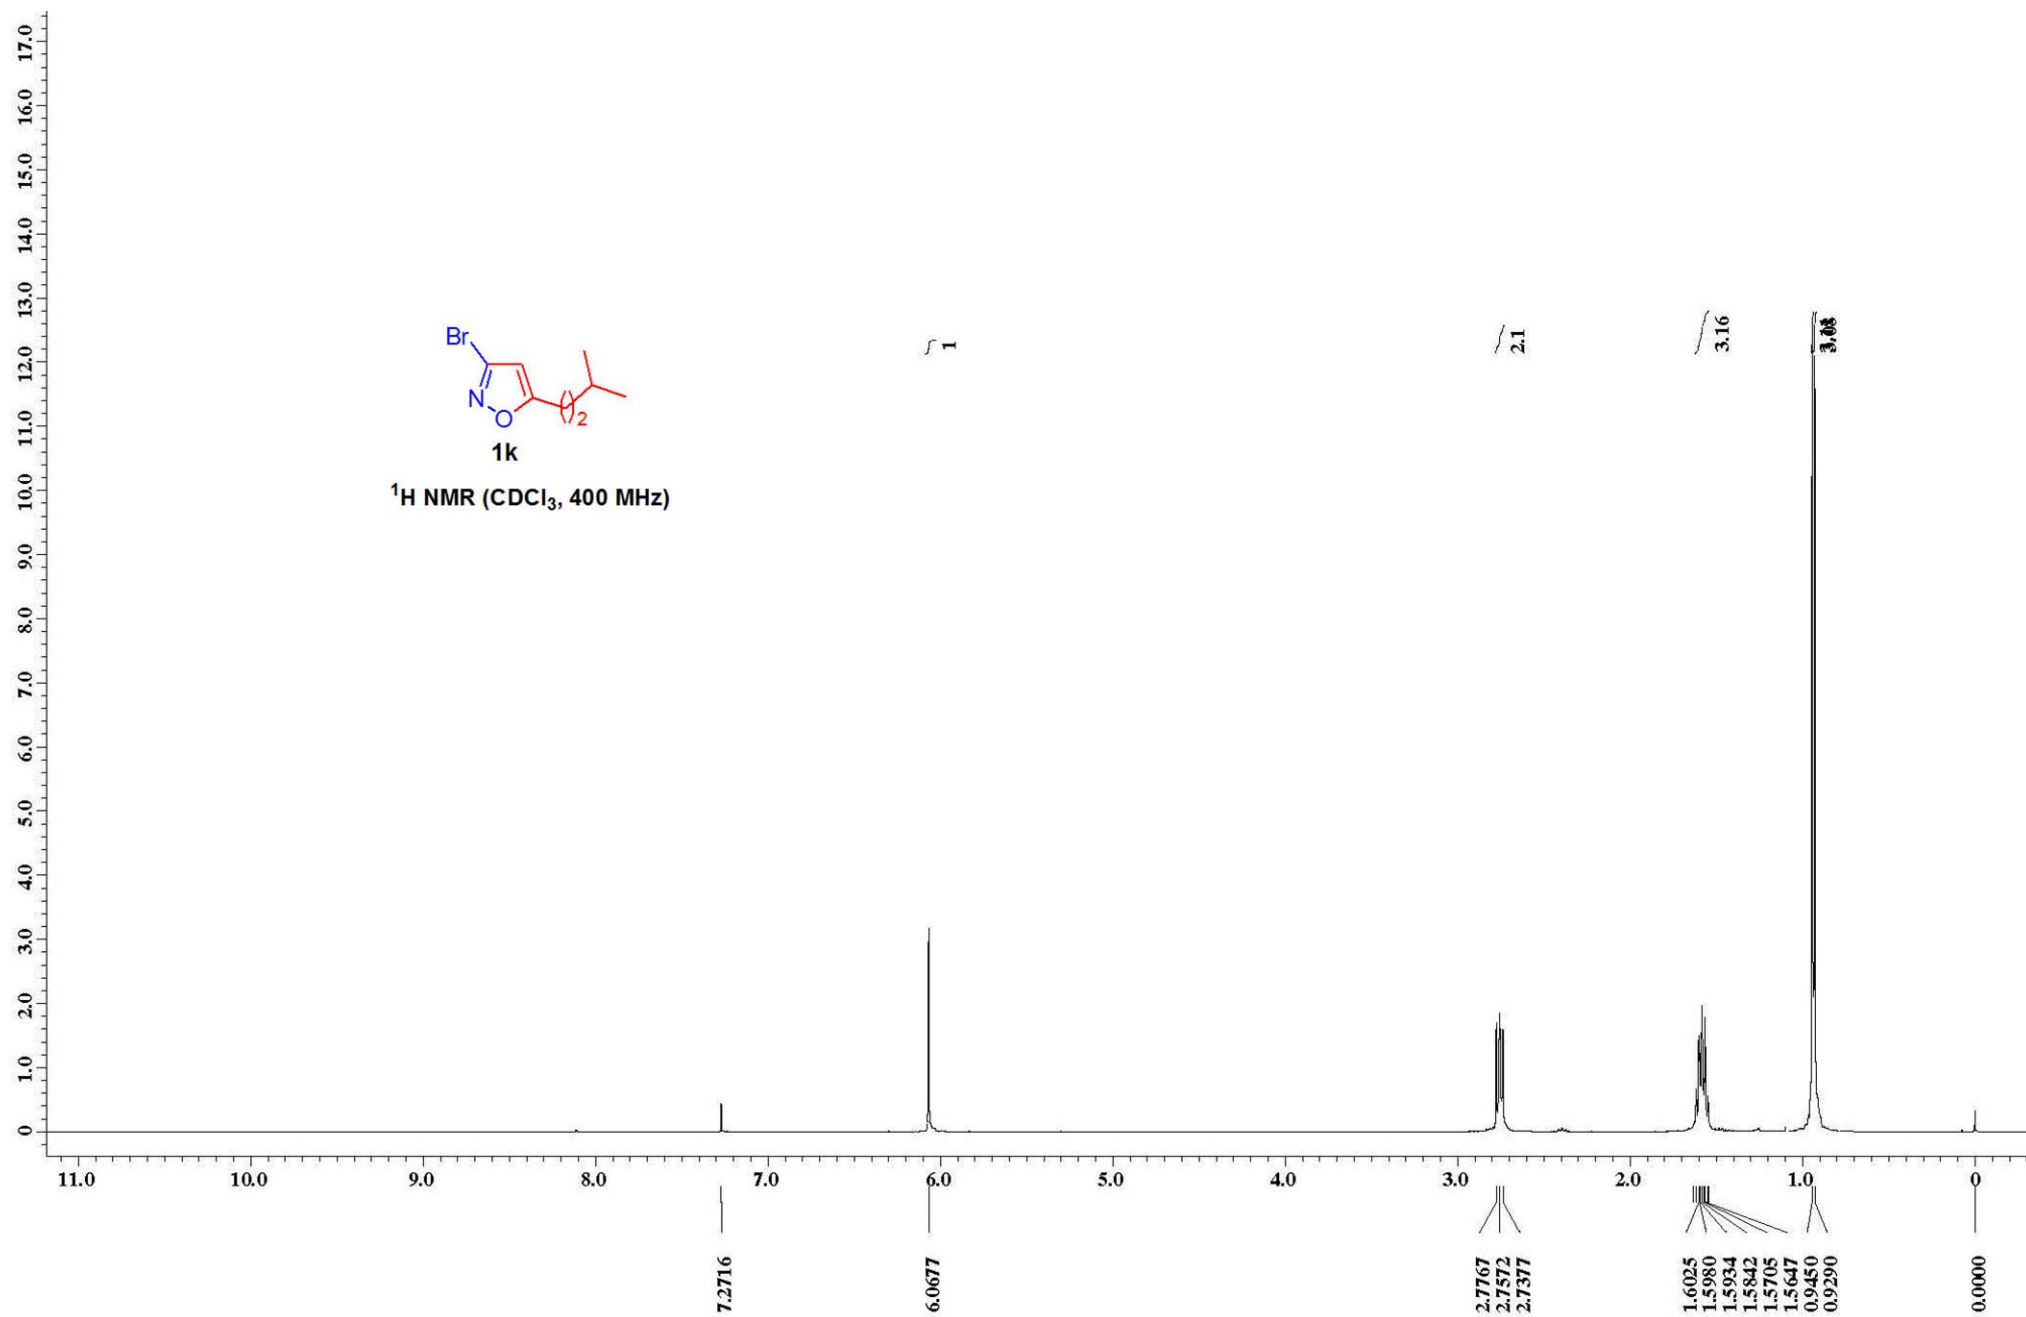



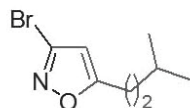

**1k**

<sup>13</sup>C NMR (CDCl<sub>3</sub>, 100 MHz)

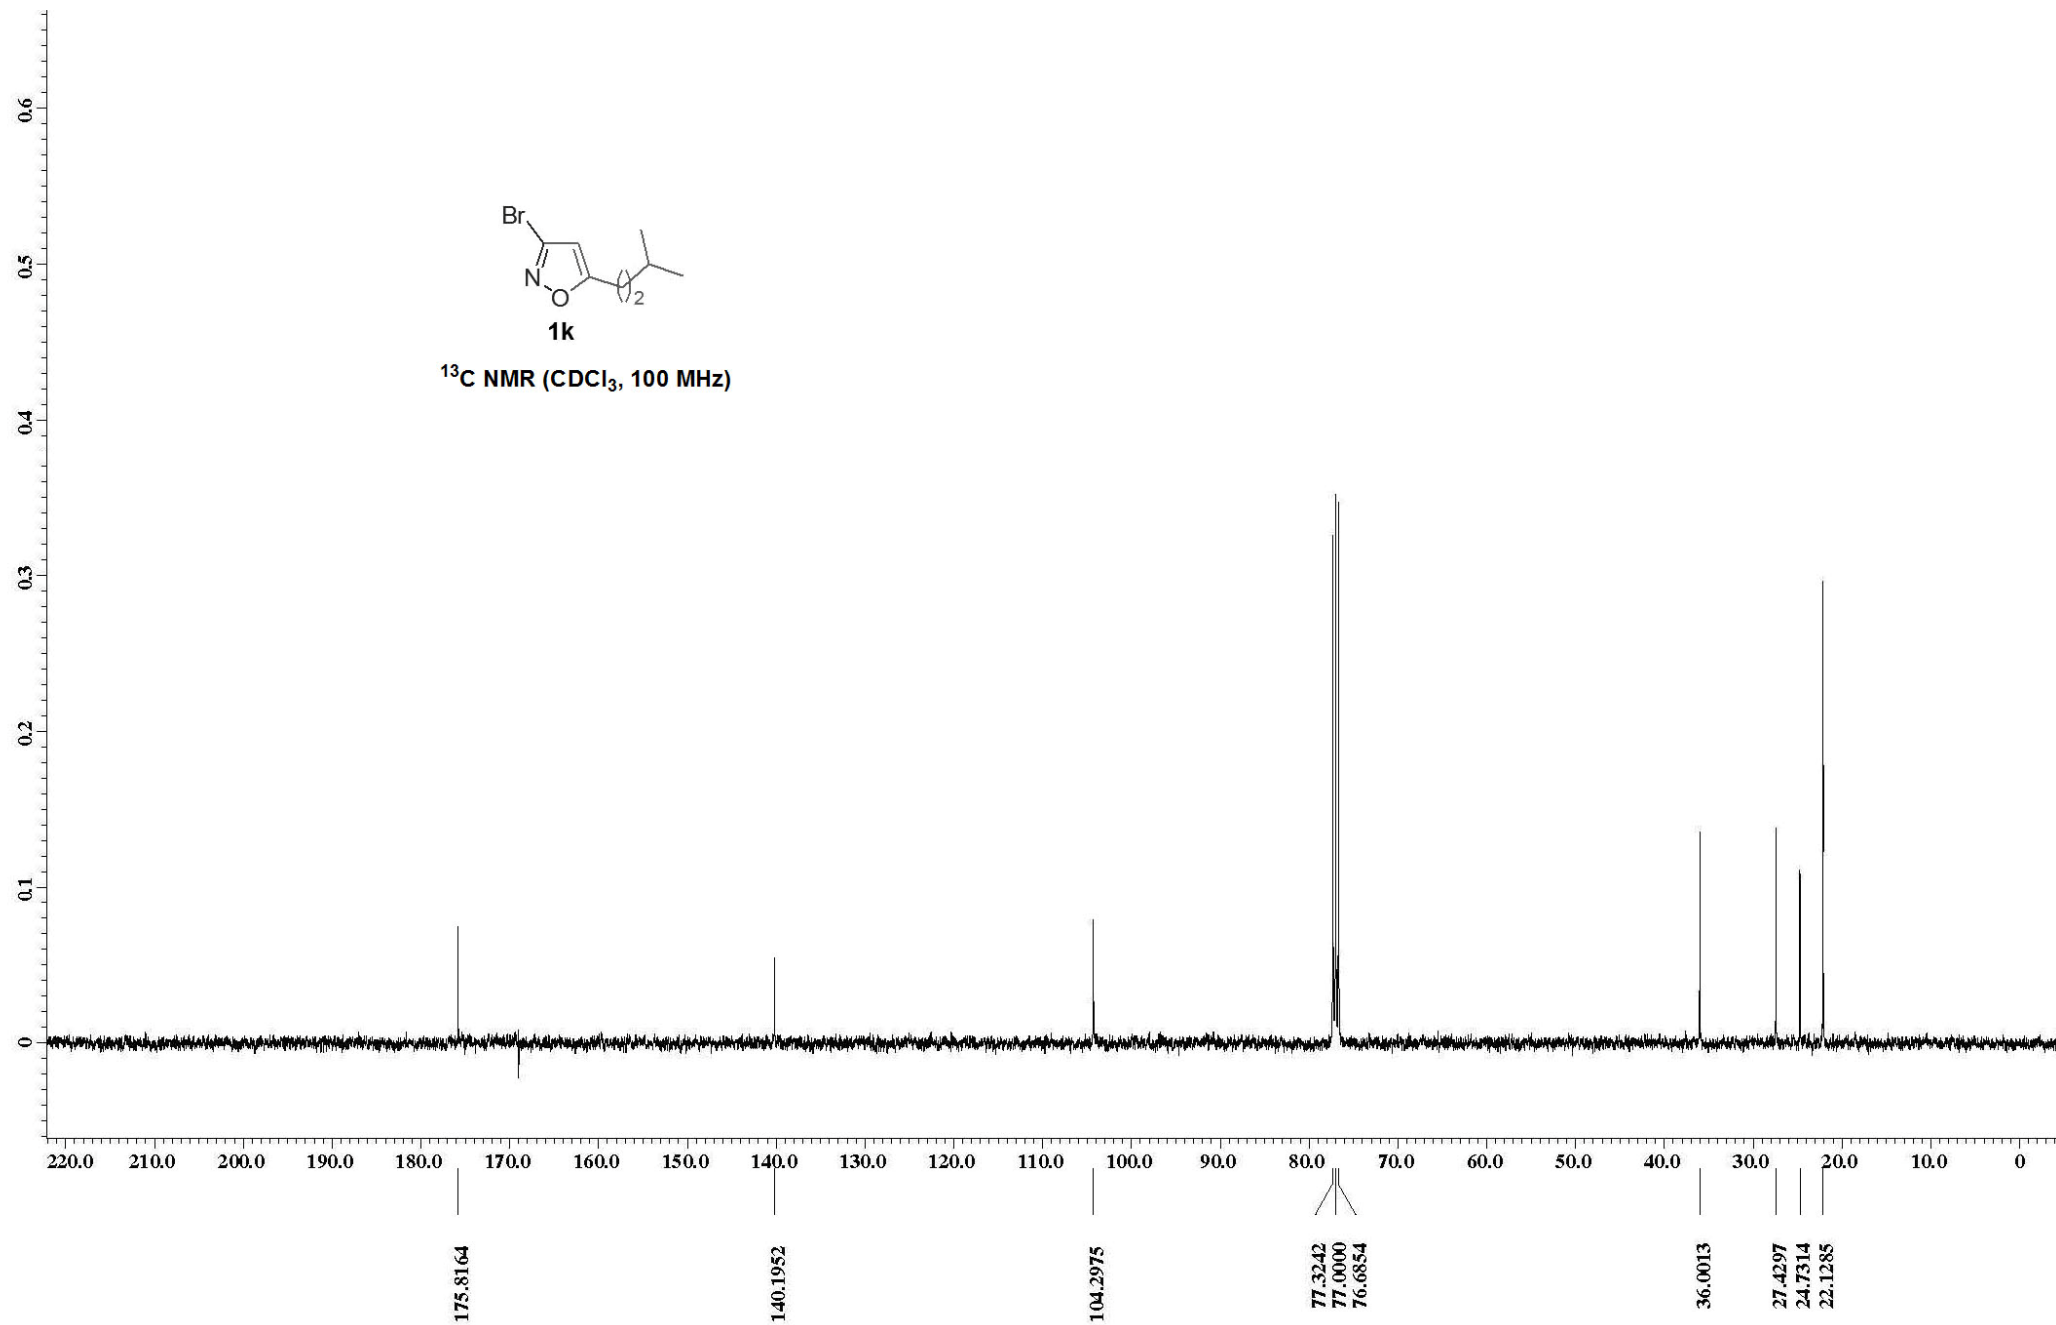

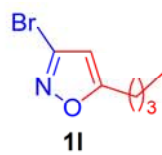

<sup>1</sup>H NMR (CDCl<sub>3</sub>, 300 MHz)

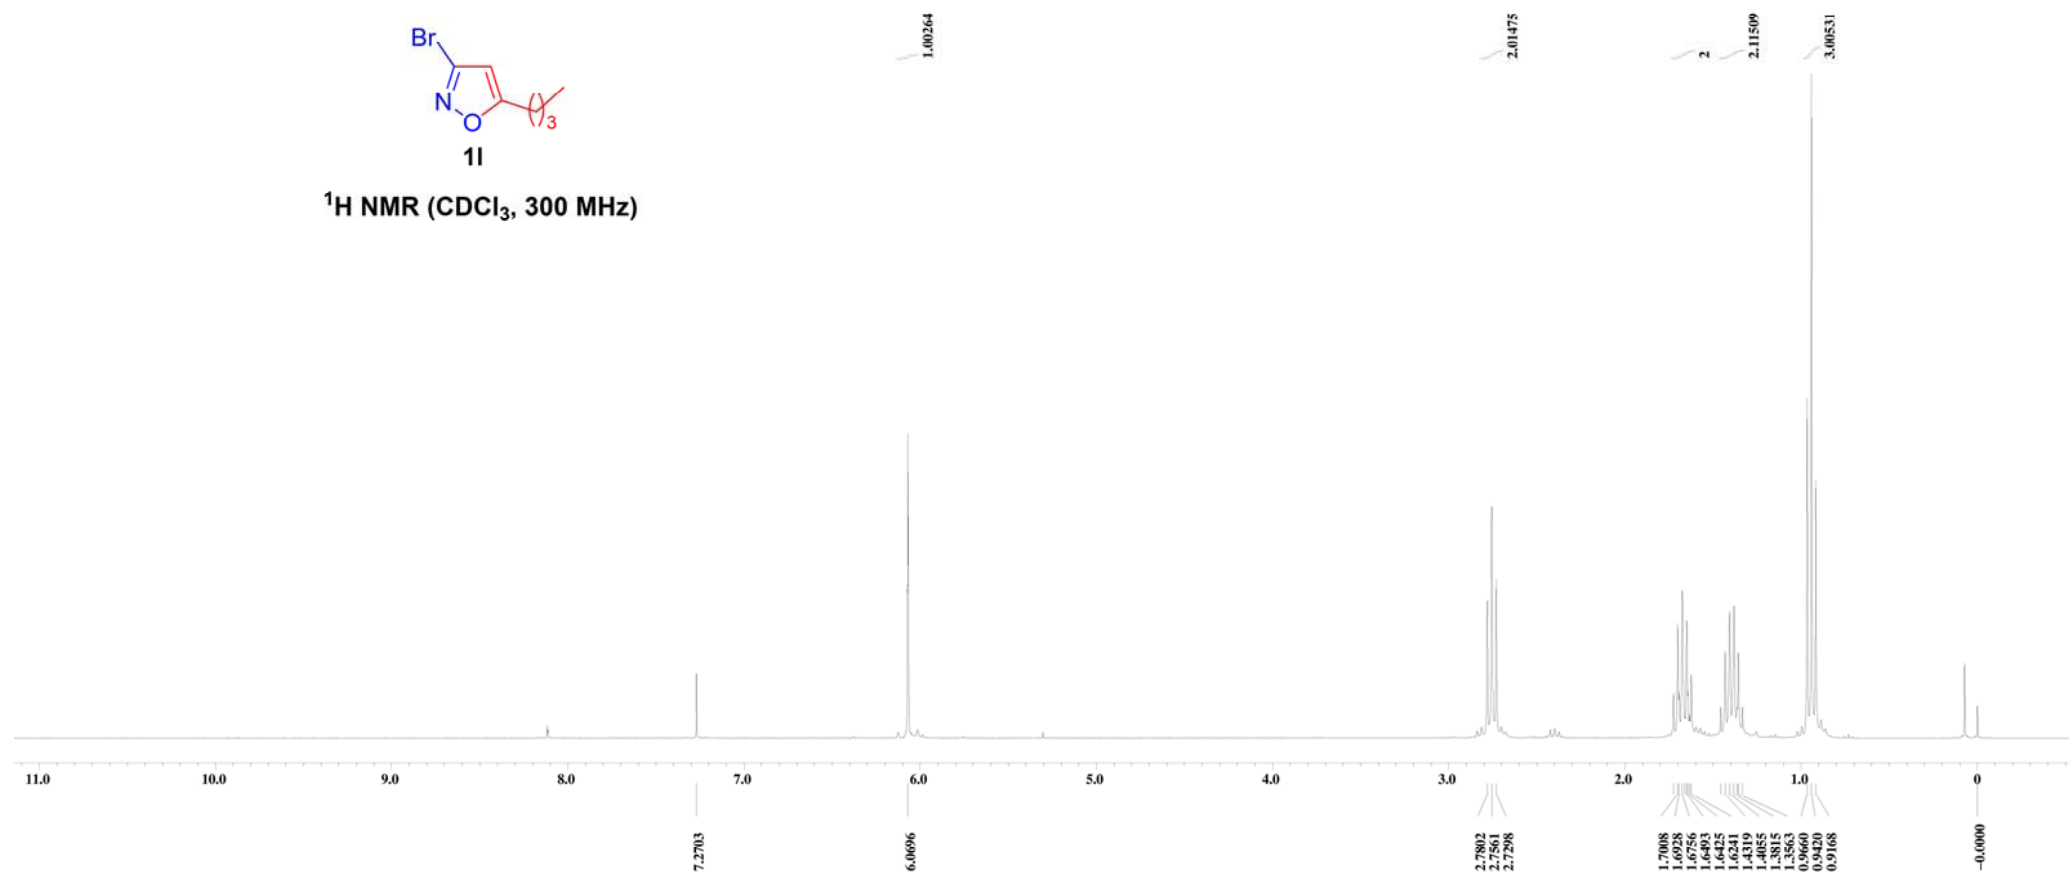

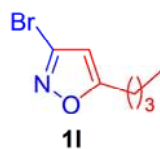

$^{13}\text{C}$  NMR ( $\text{CDCl}_3$ , 75 MHz)

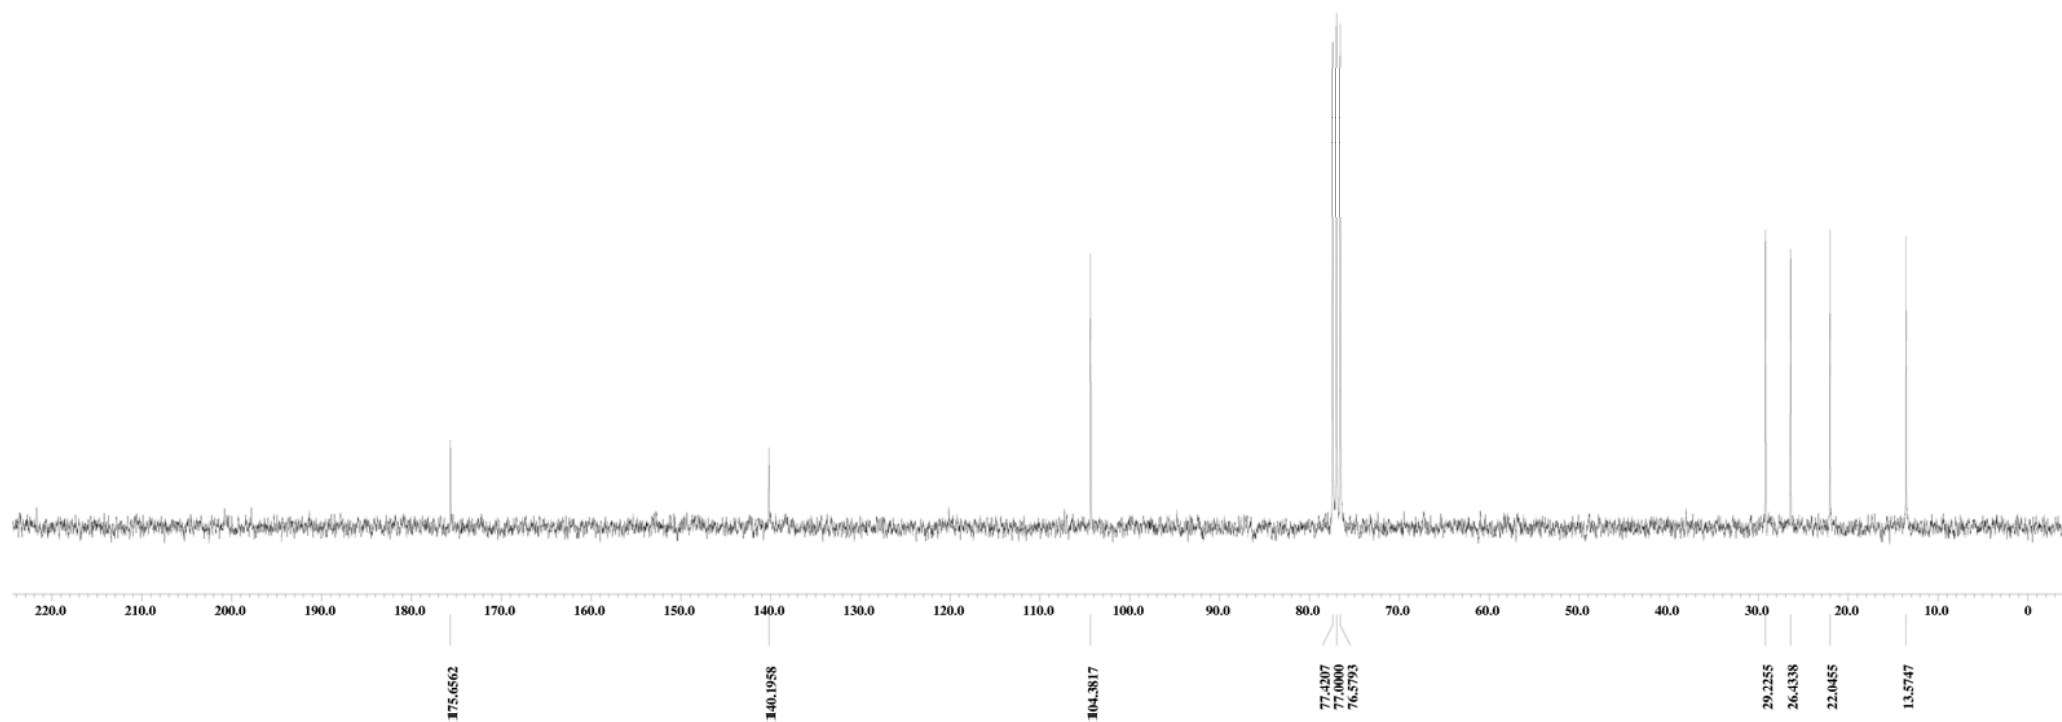

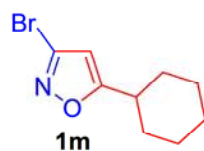

<sup>1</sup>H NMR (CDCl<sub>3</sub>, 300 MHz)

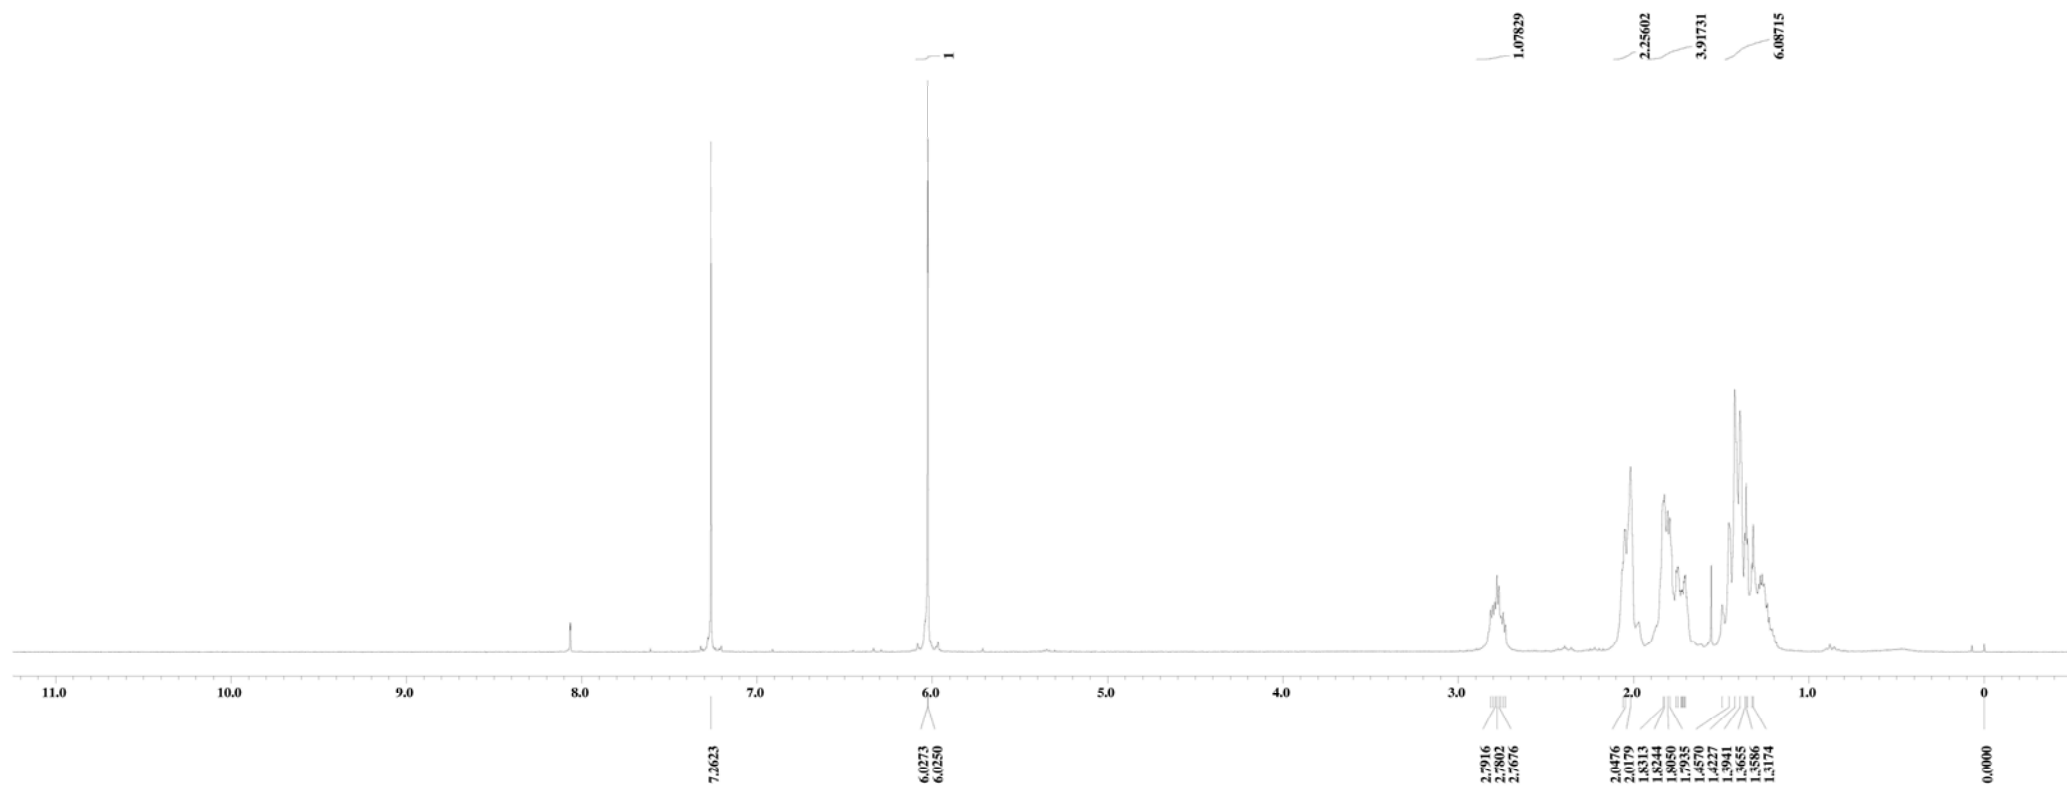

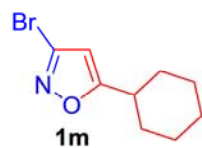

$^{13}\text{C}$  NMR ( $\text{CDCl}_3$ , 75 MHz)

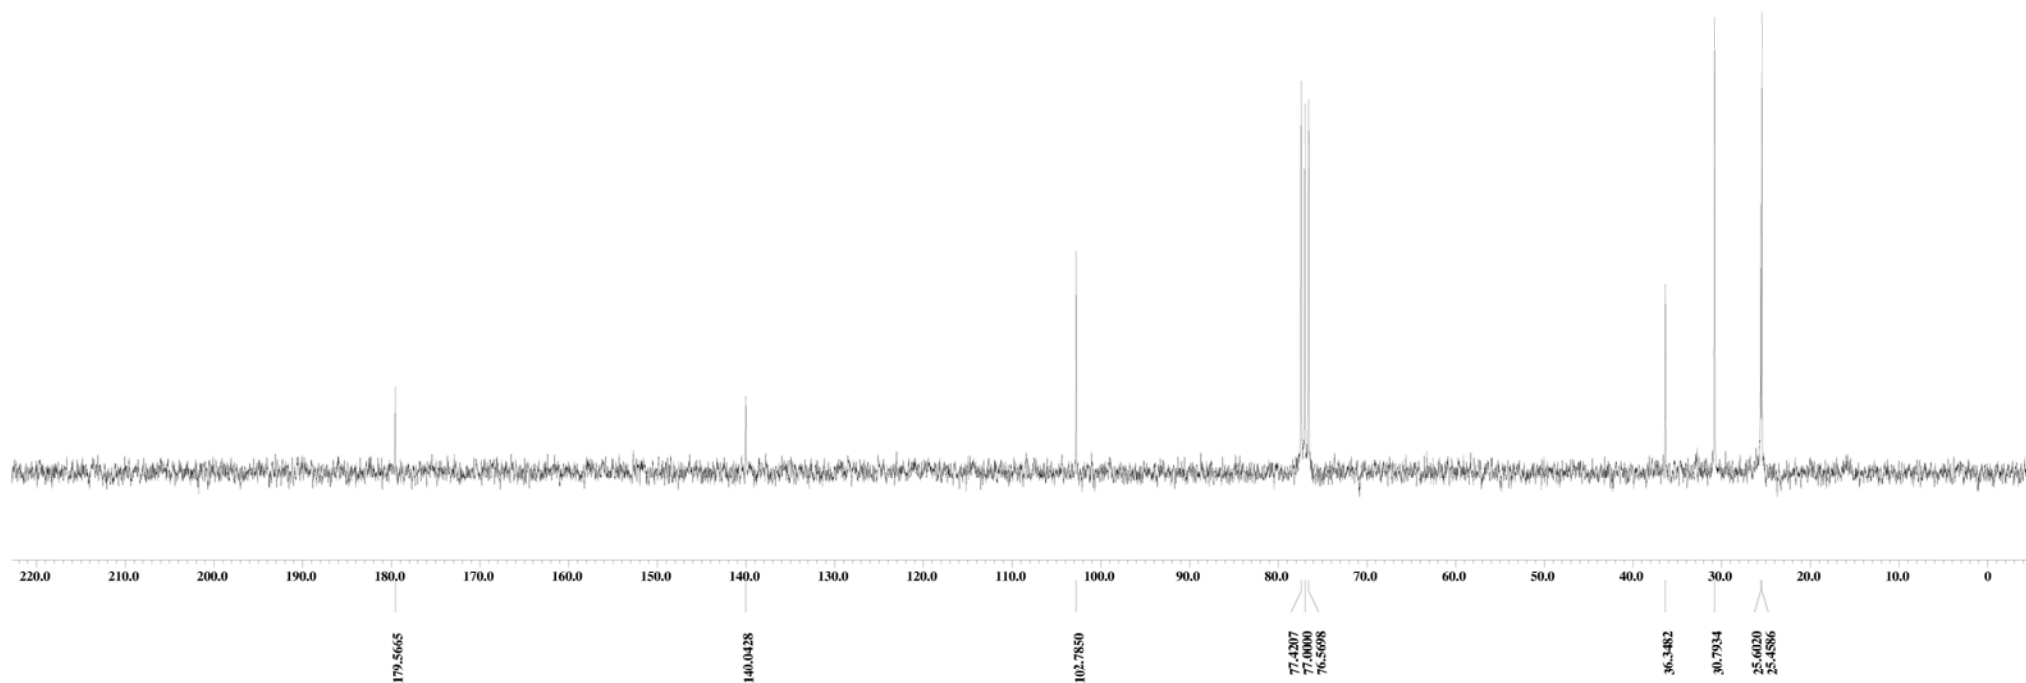

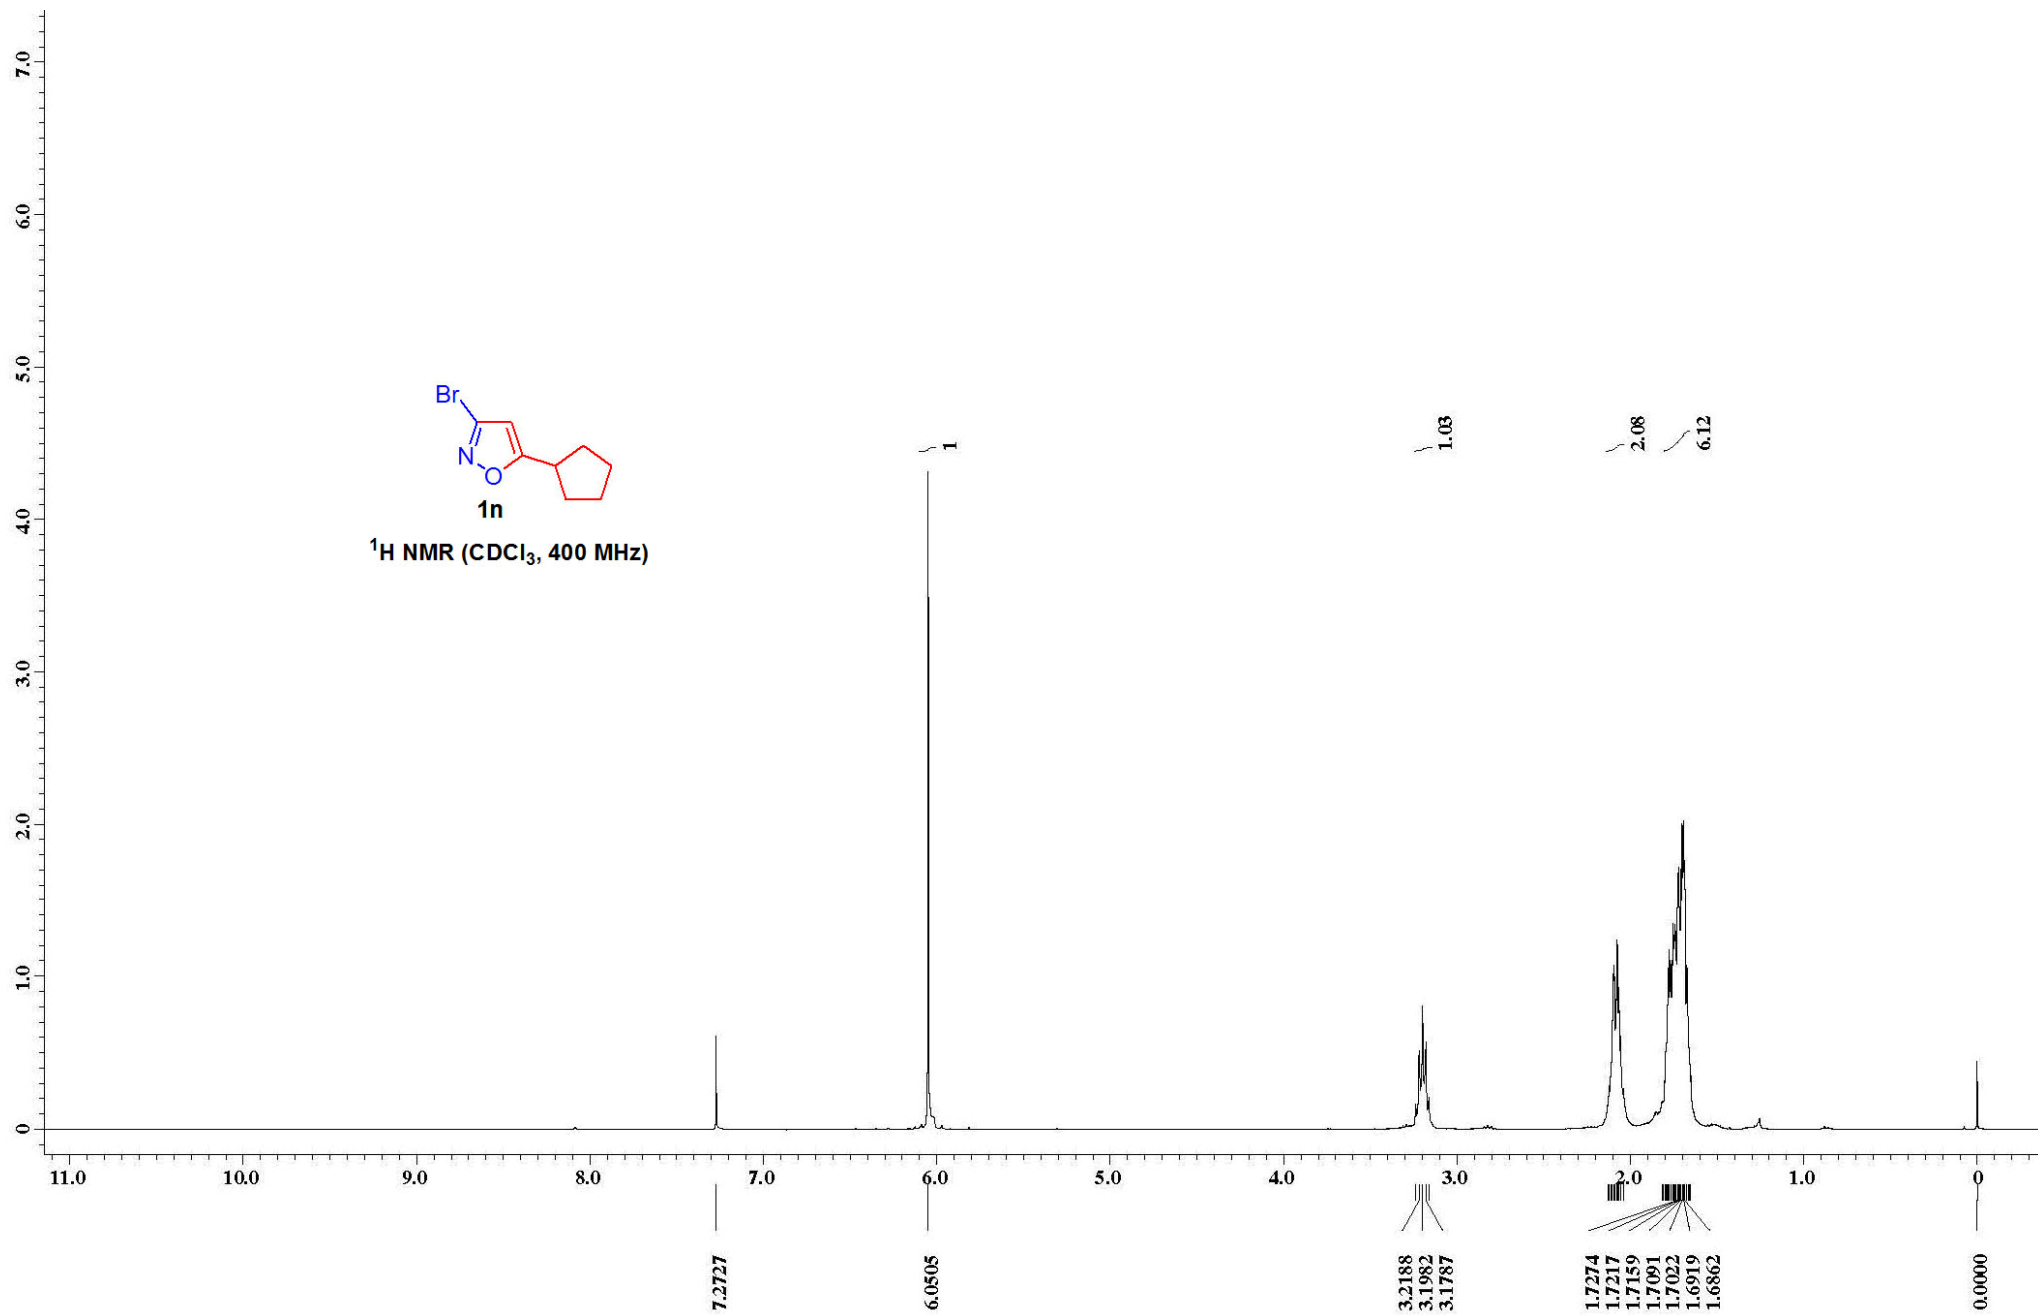

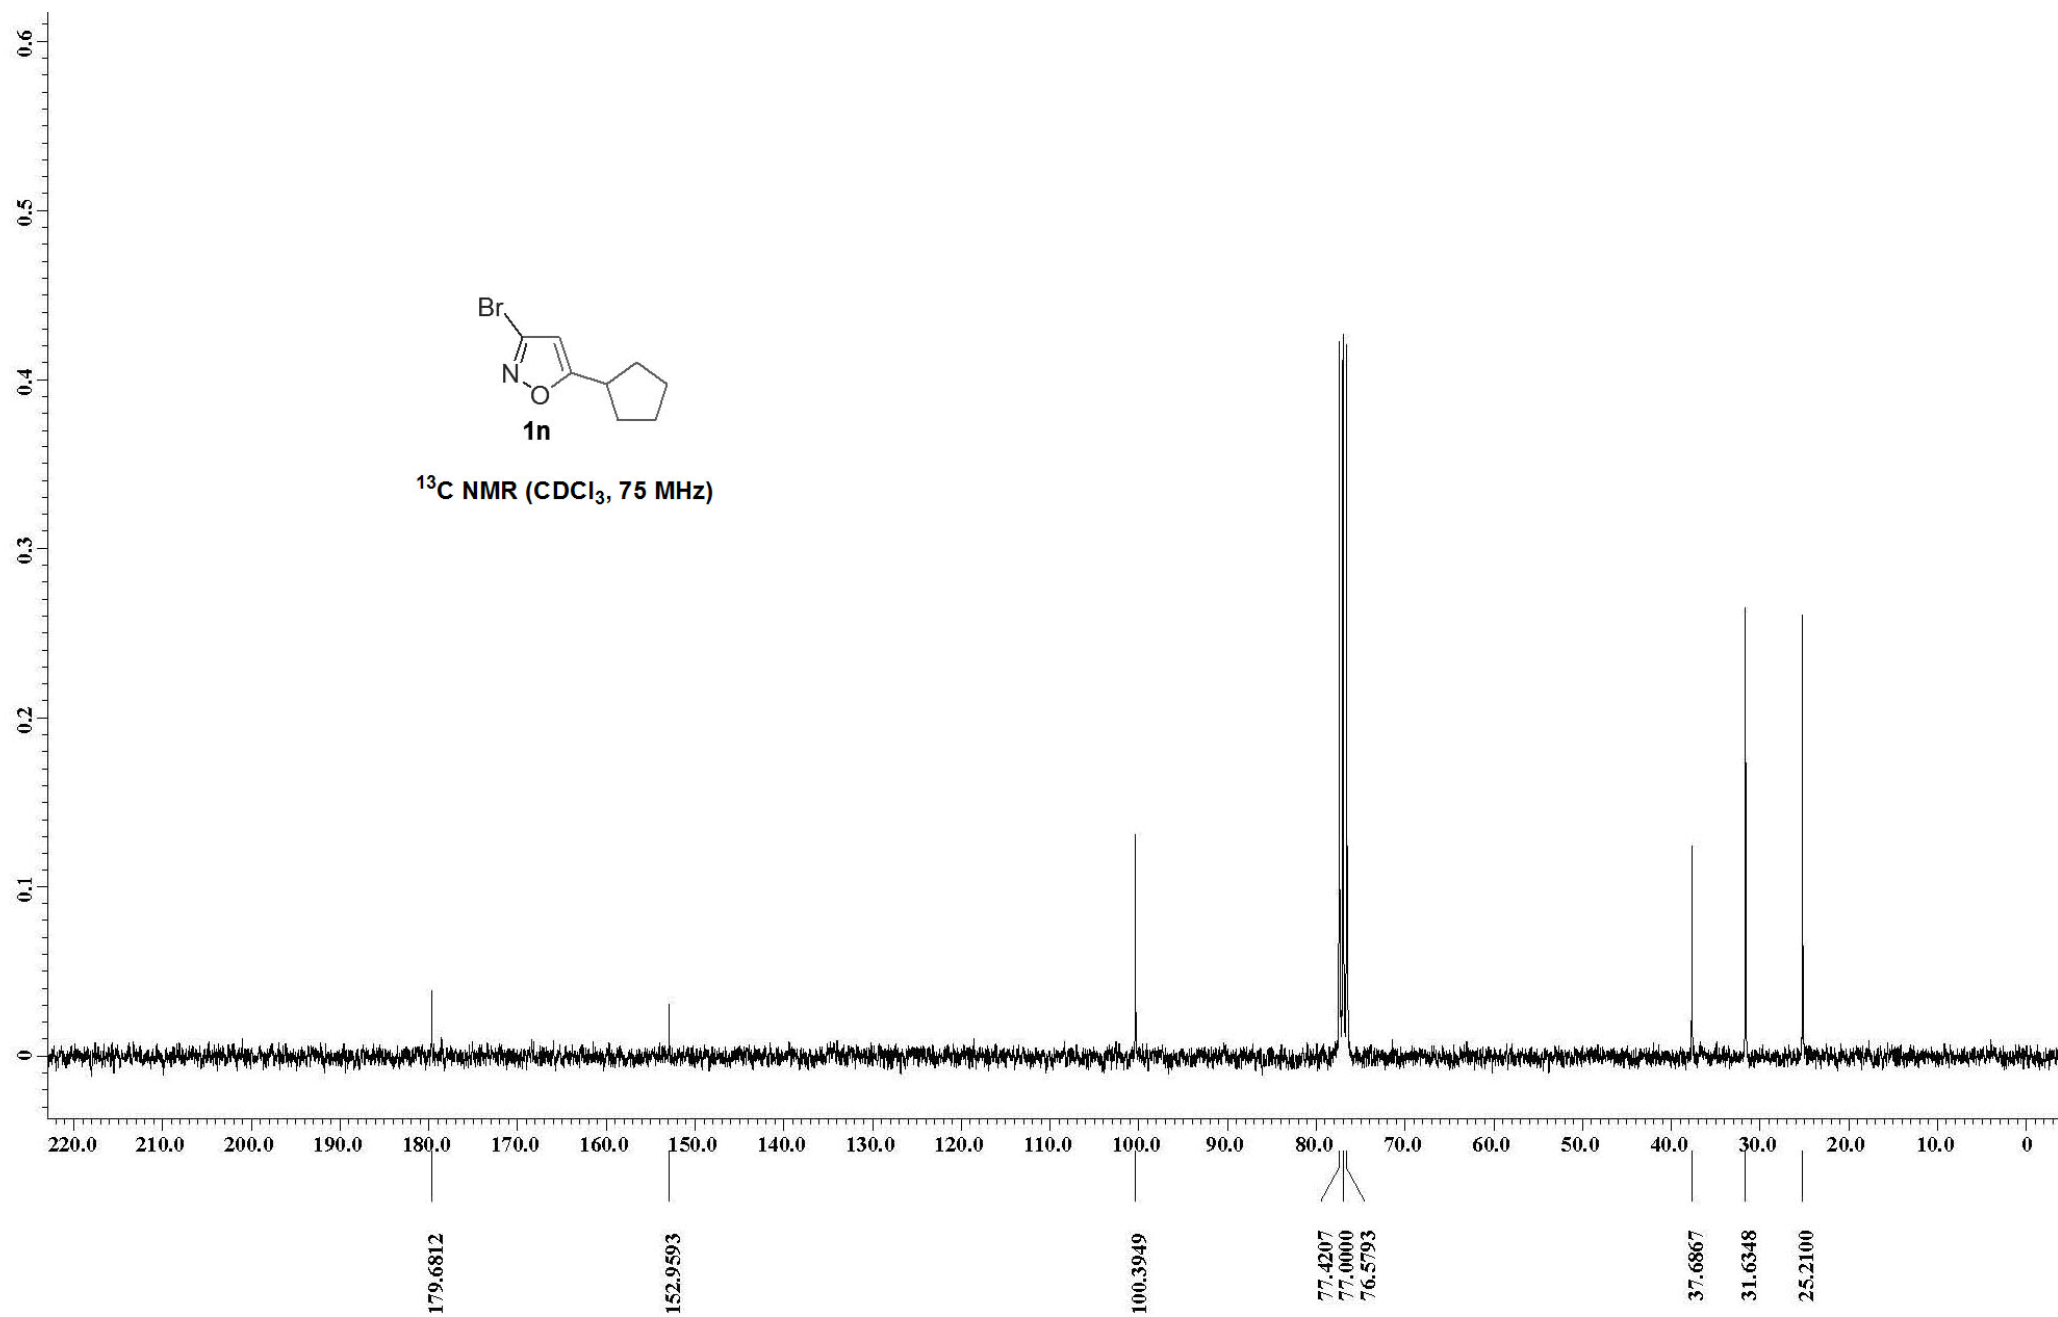

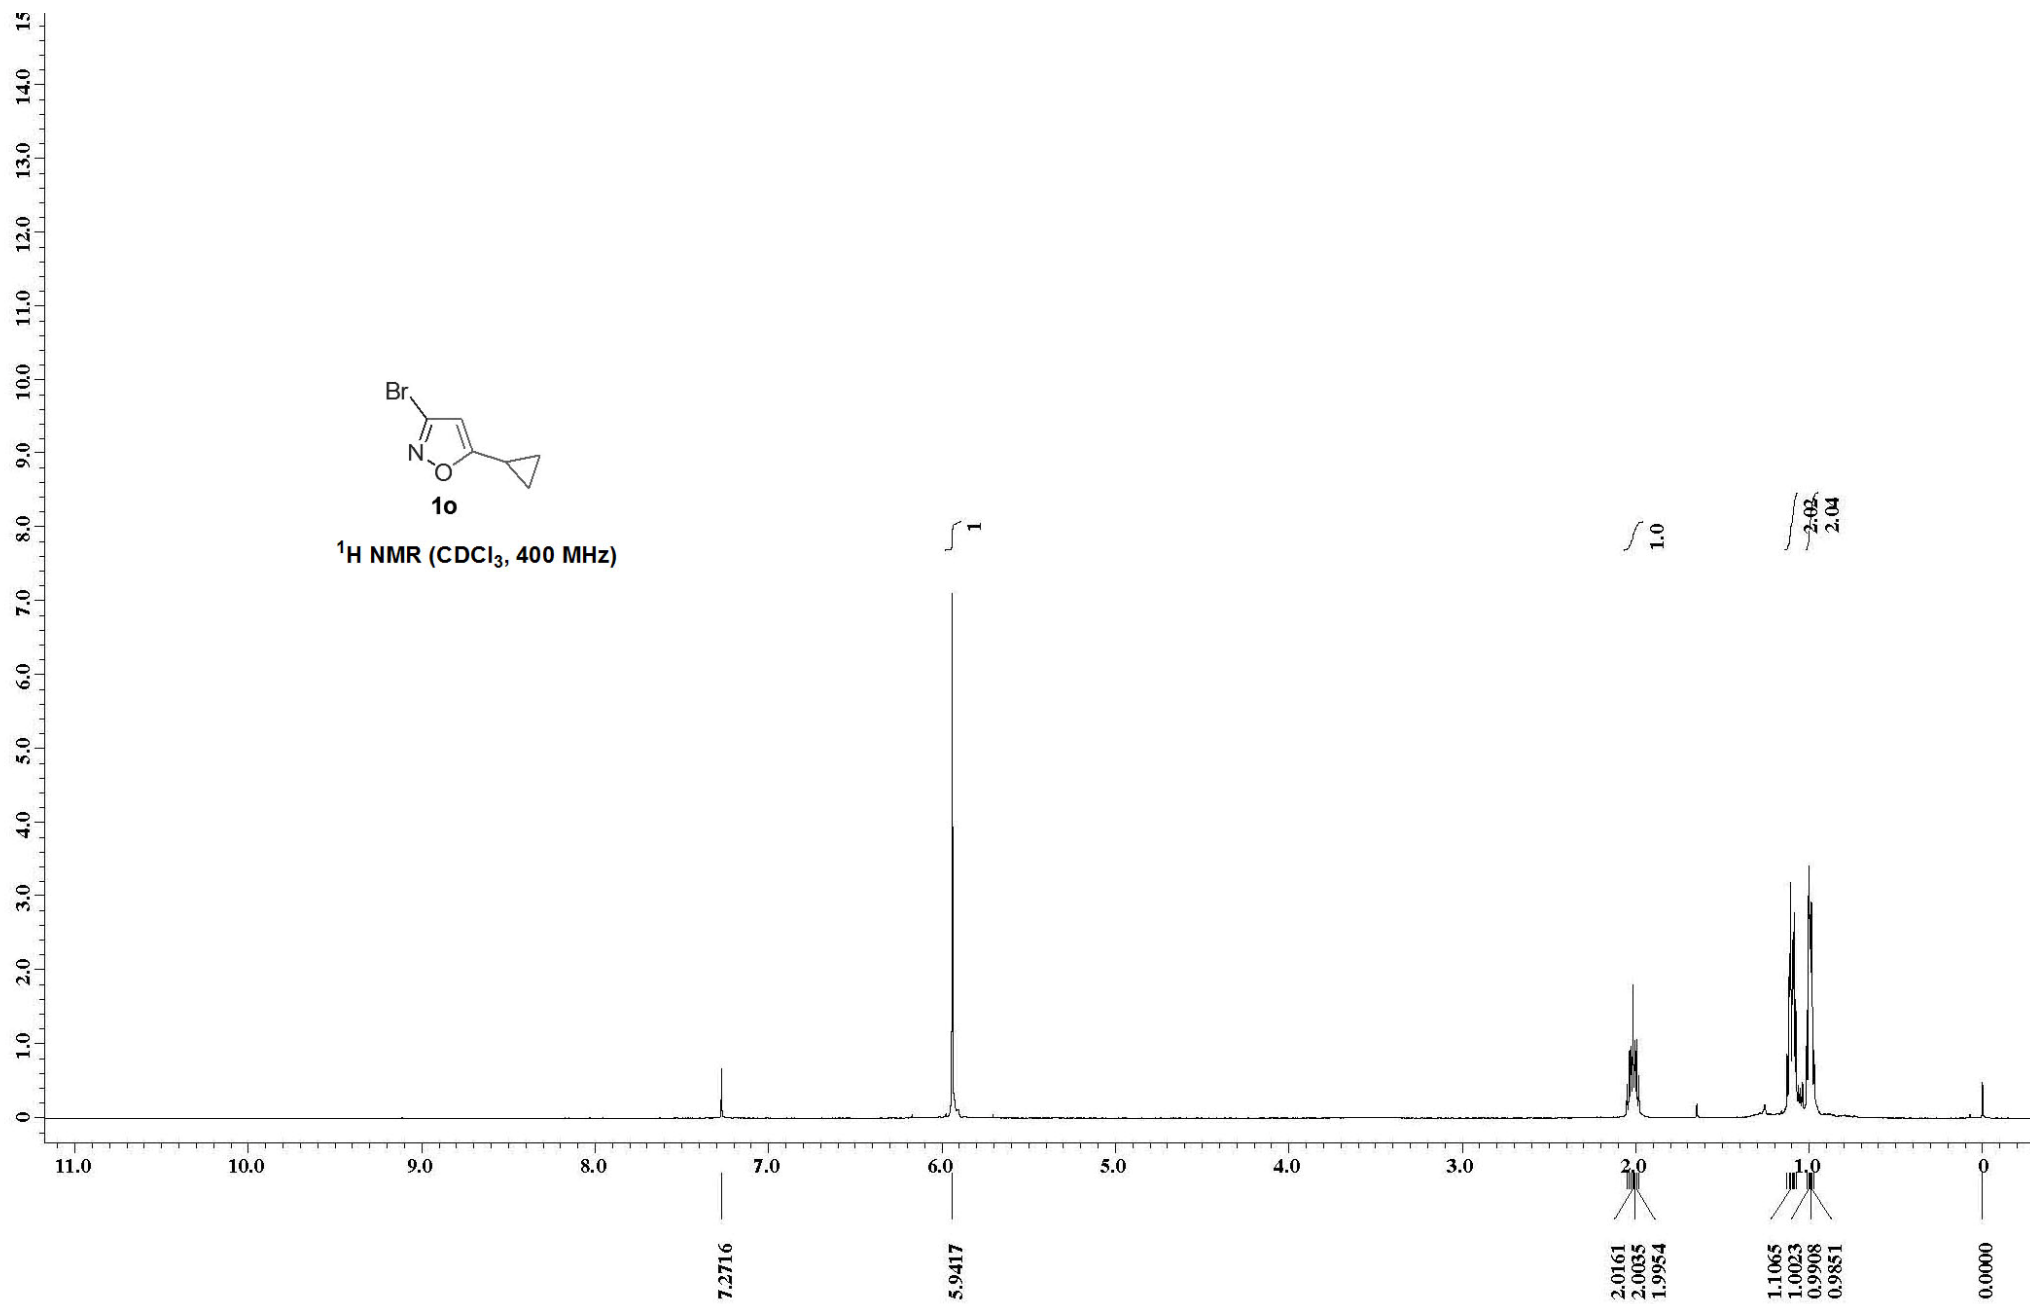



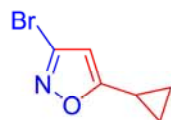

1o

<sup>13</sup>C NMR (CDCl<sub>3</sub>, 75 MHz)

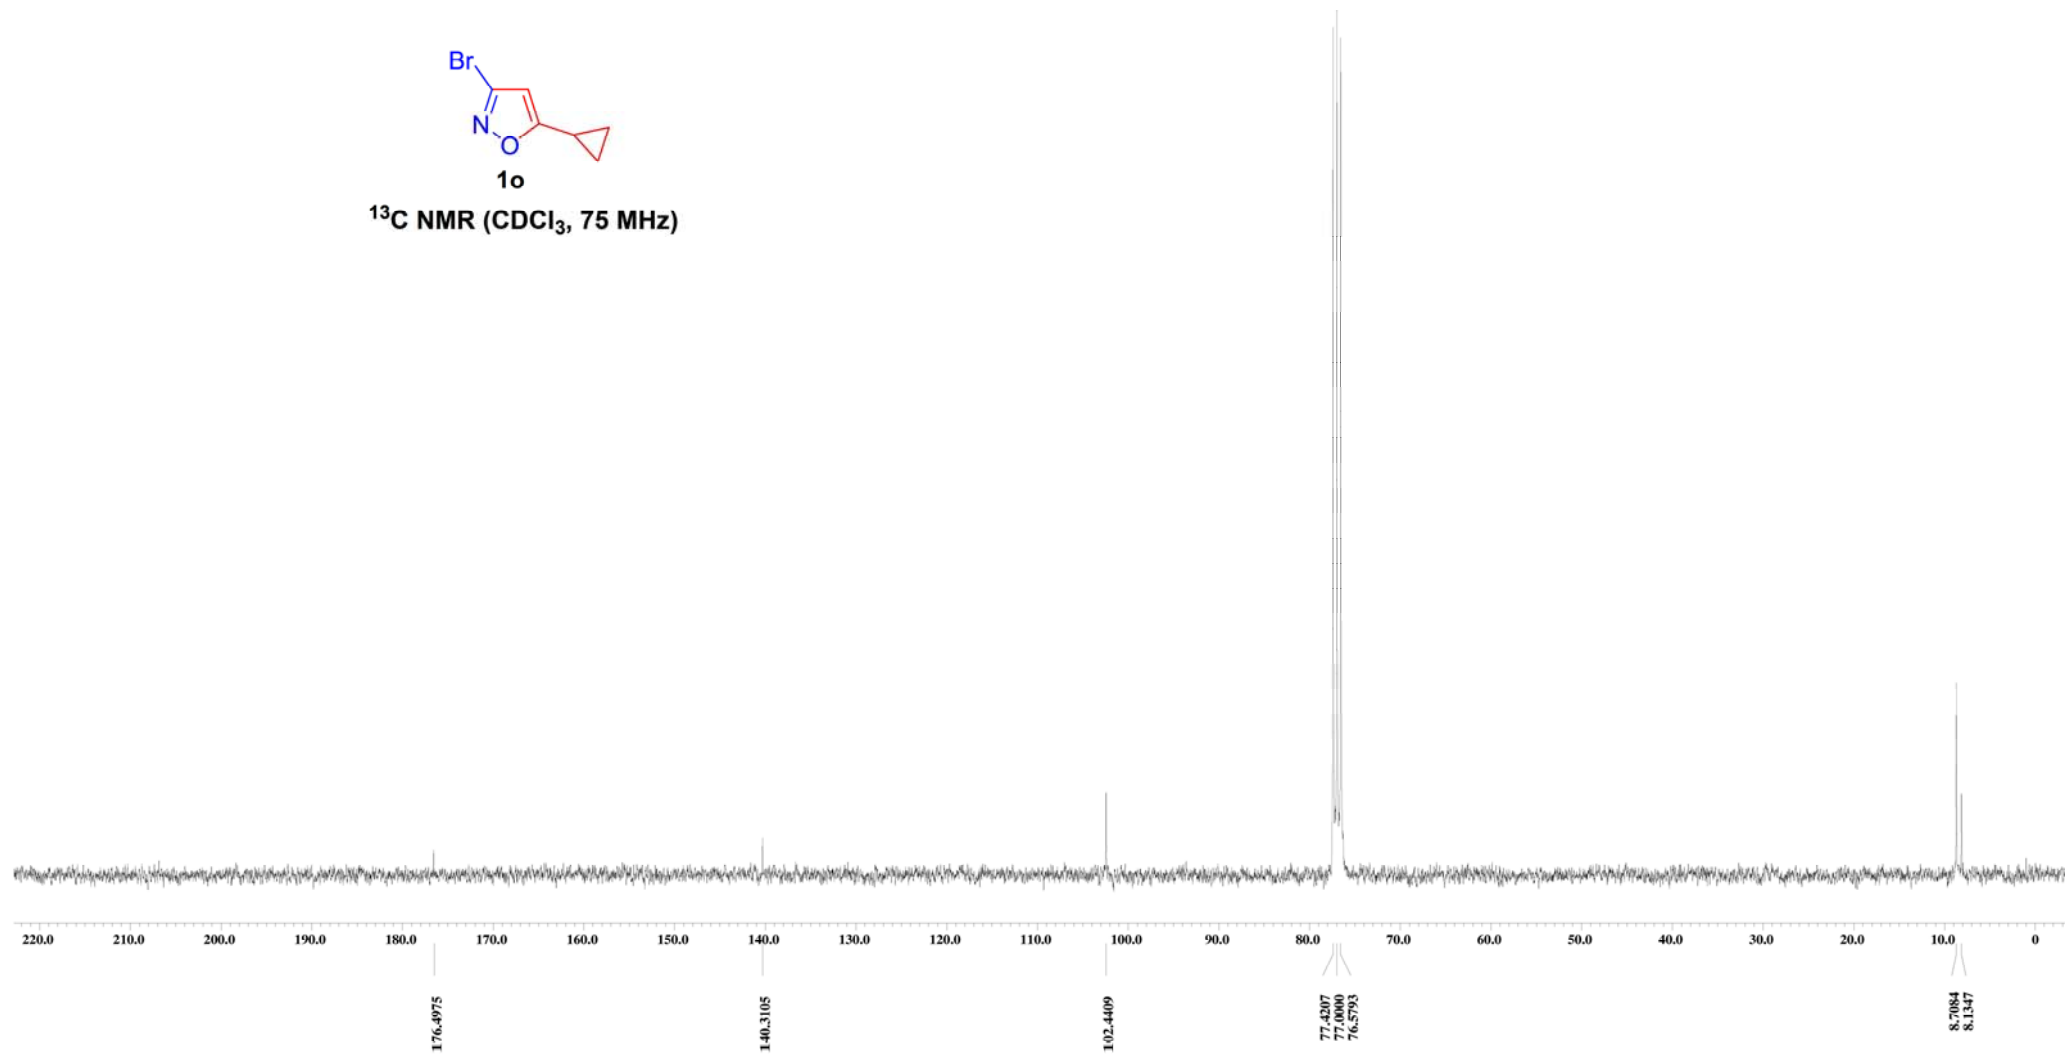

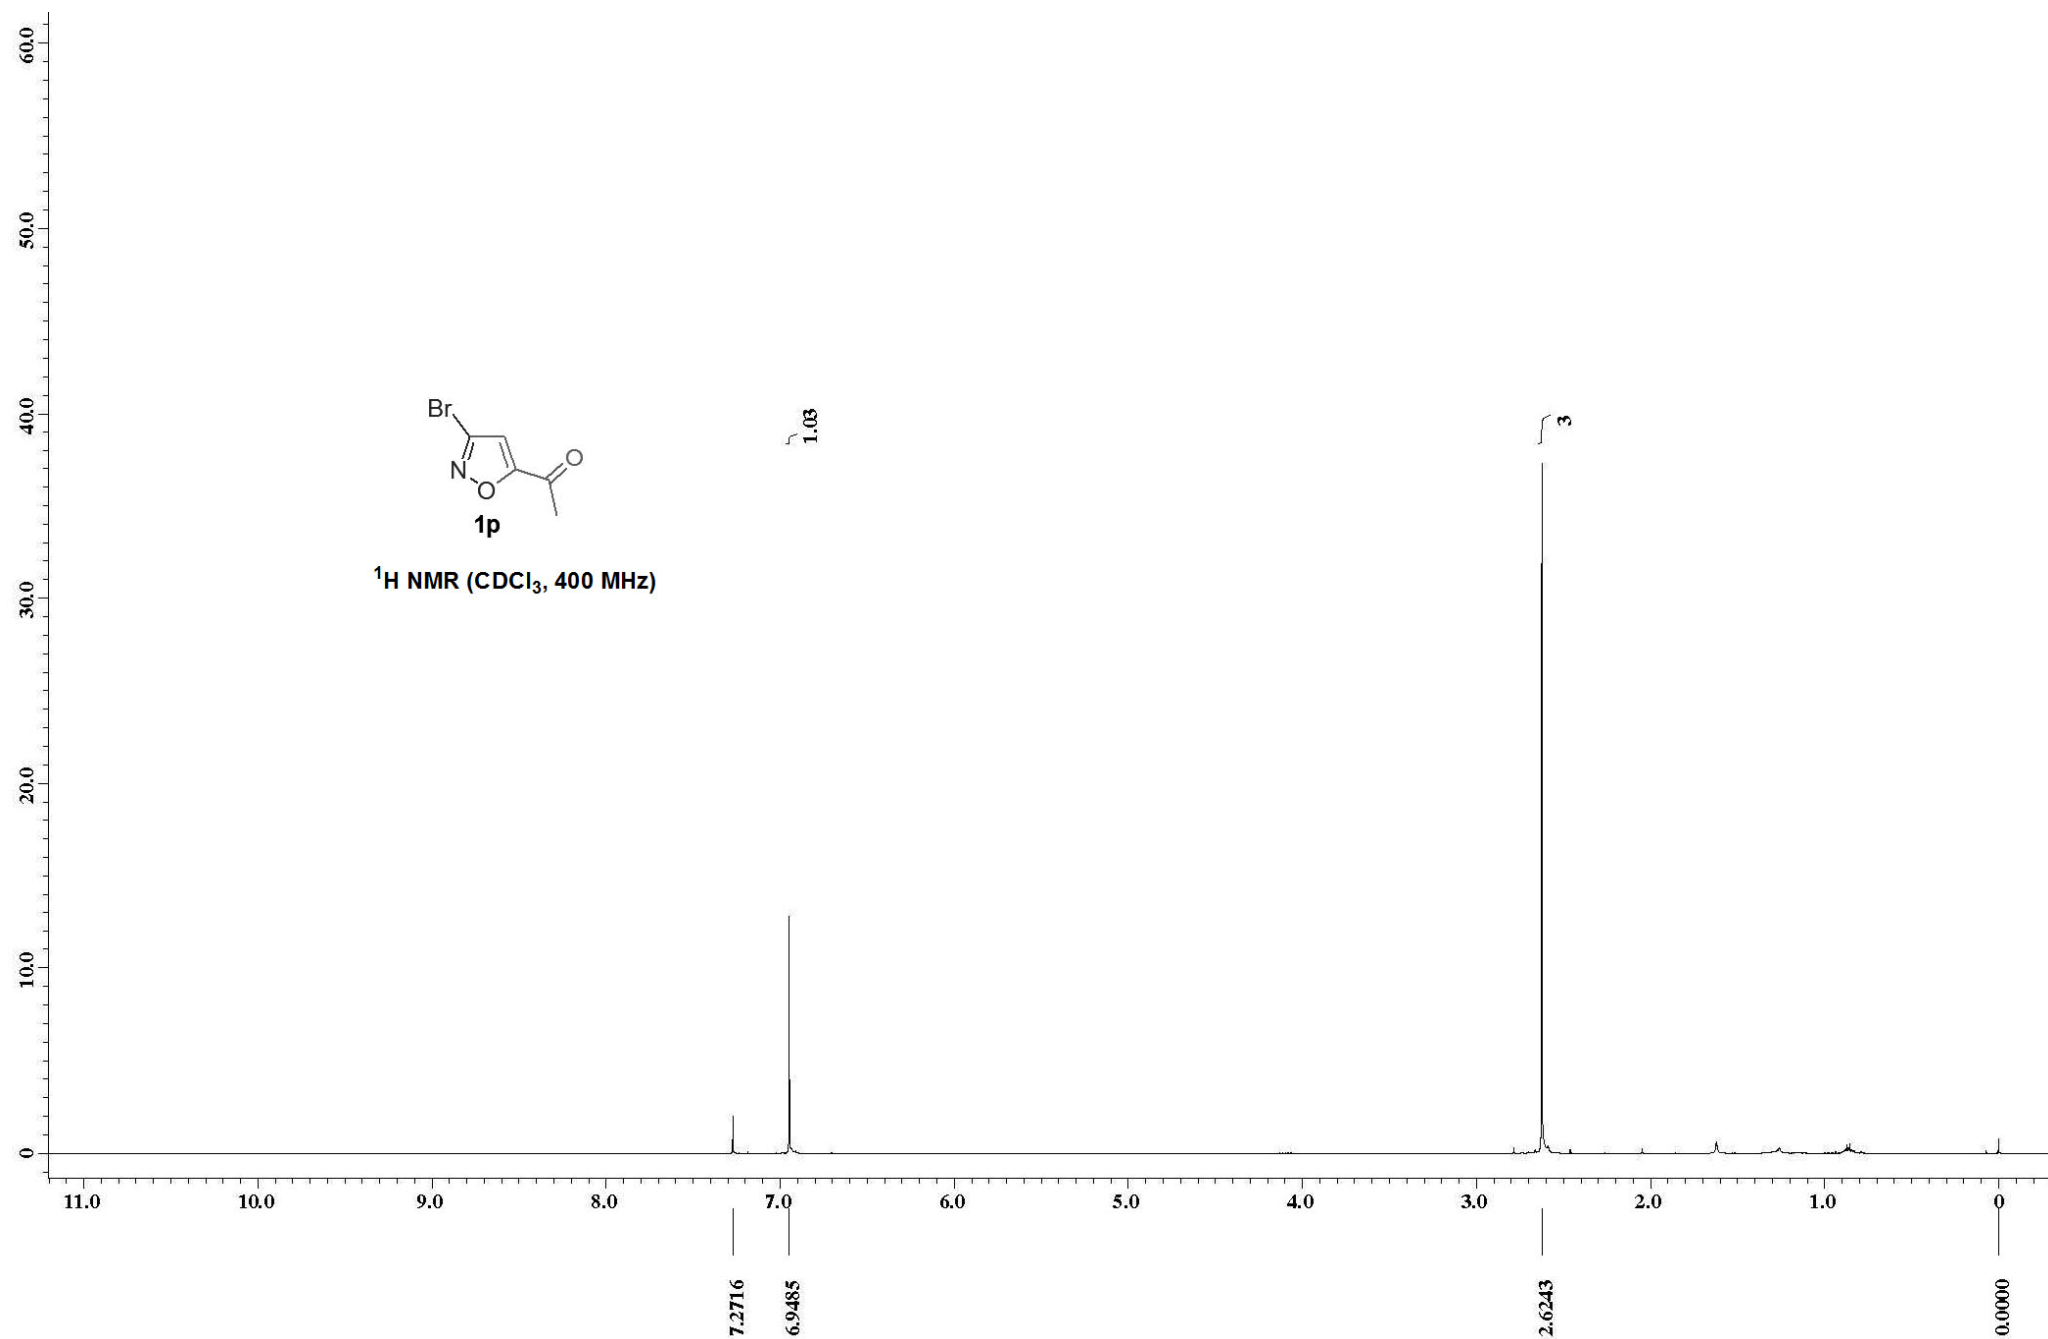

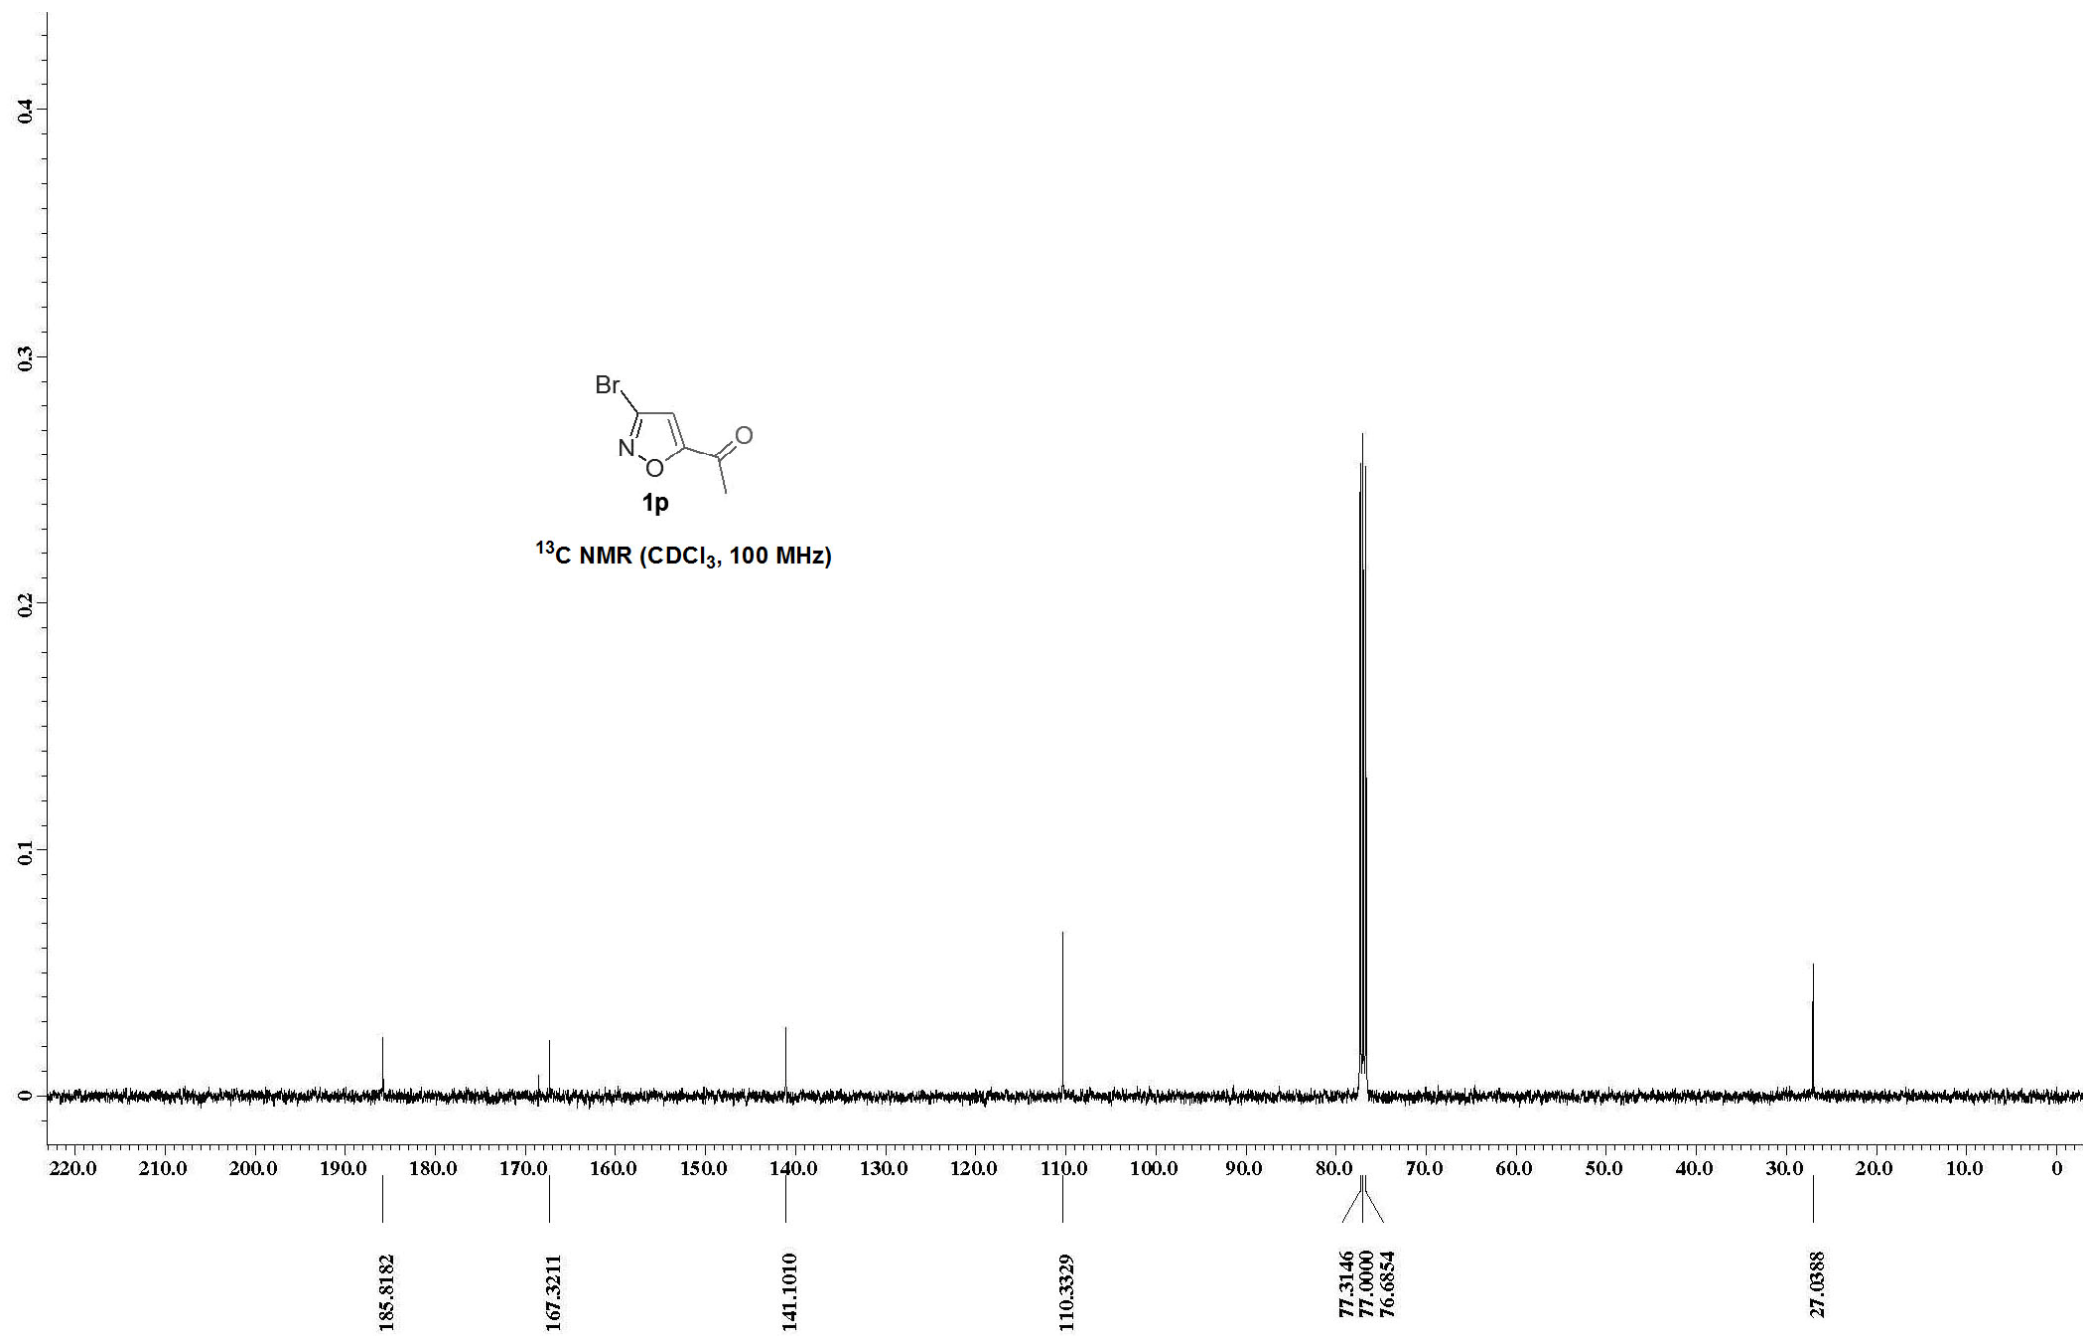

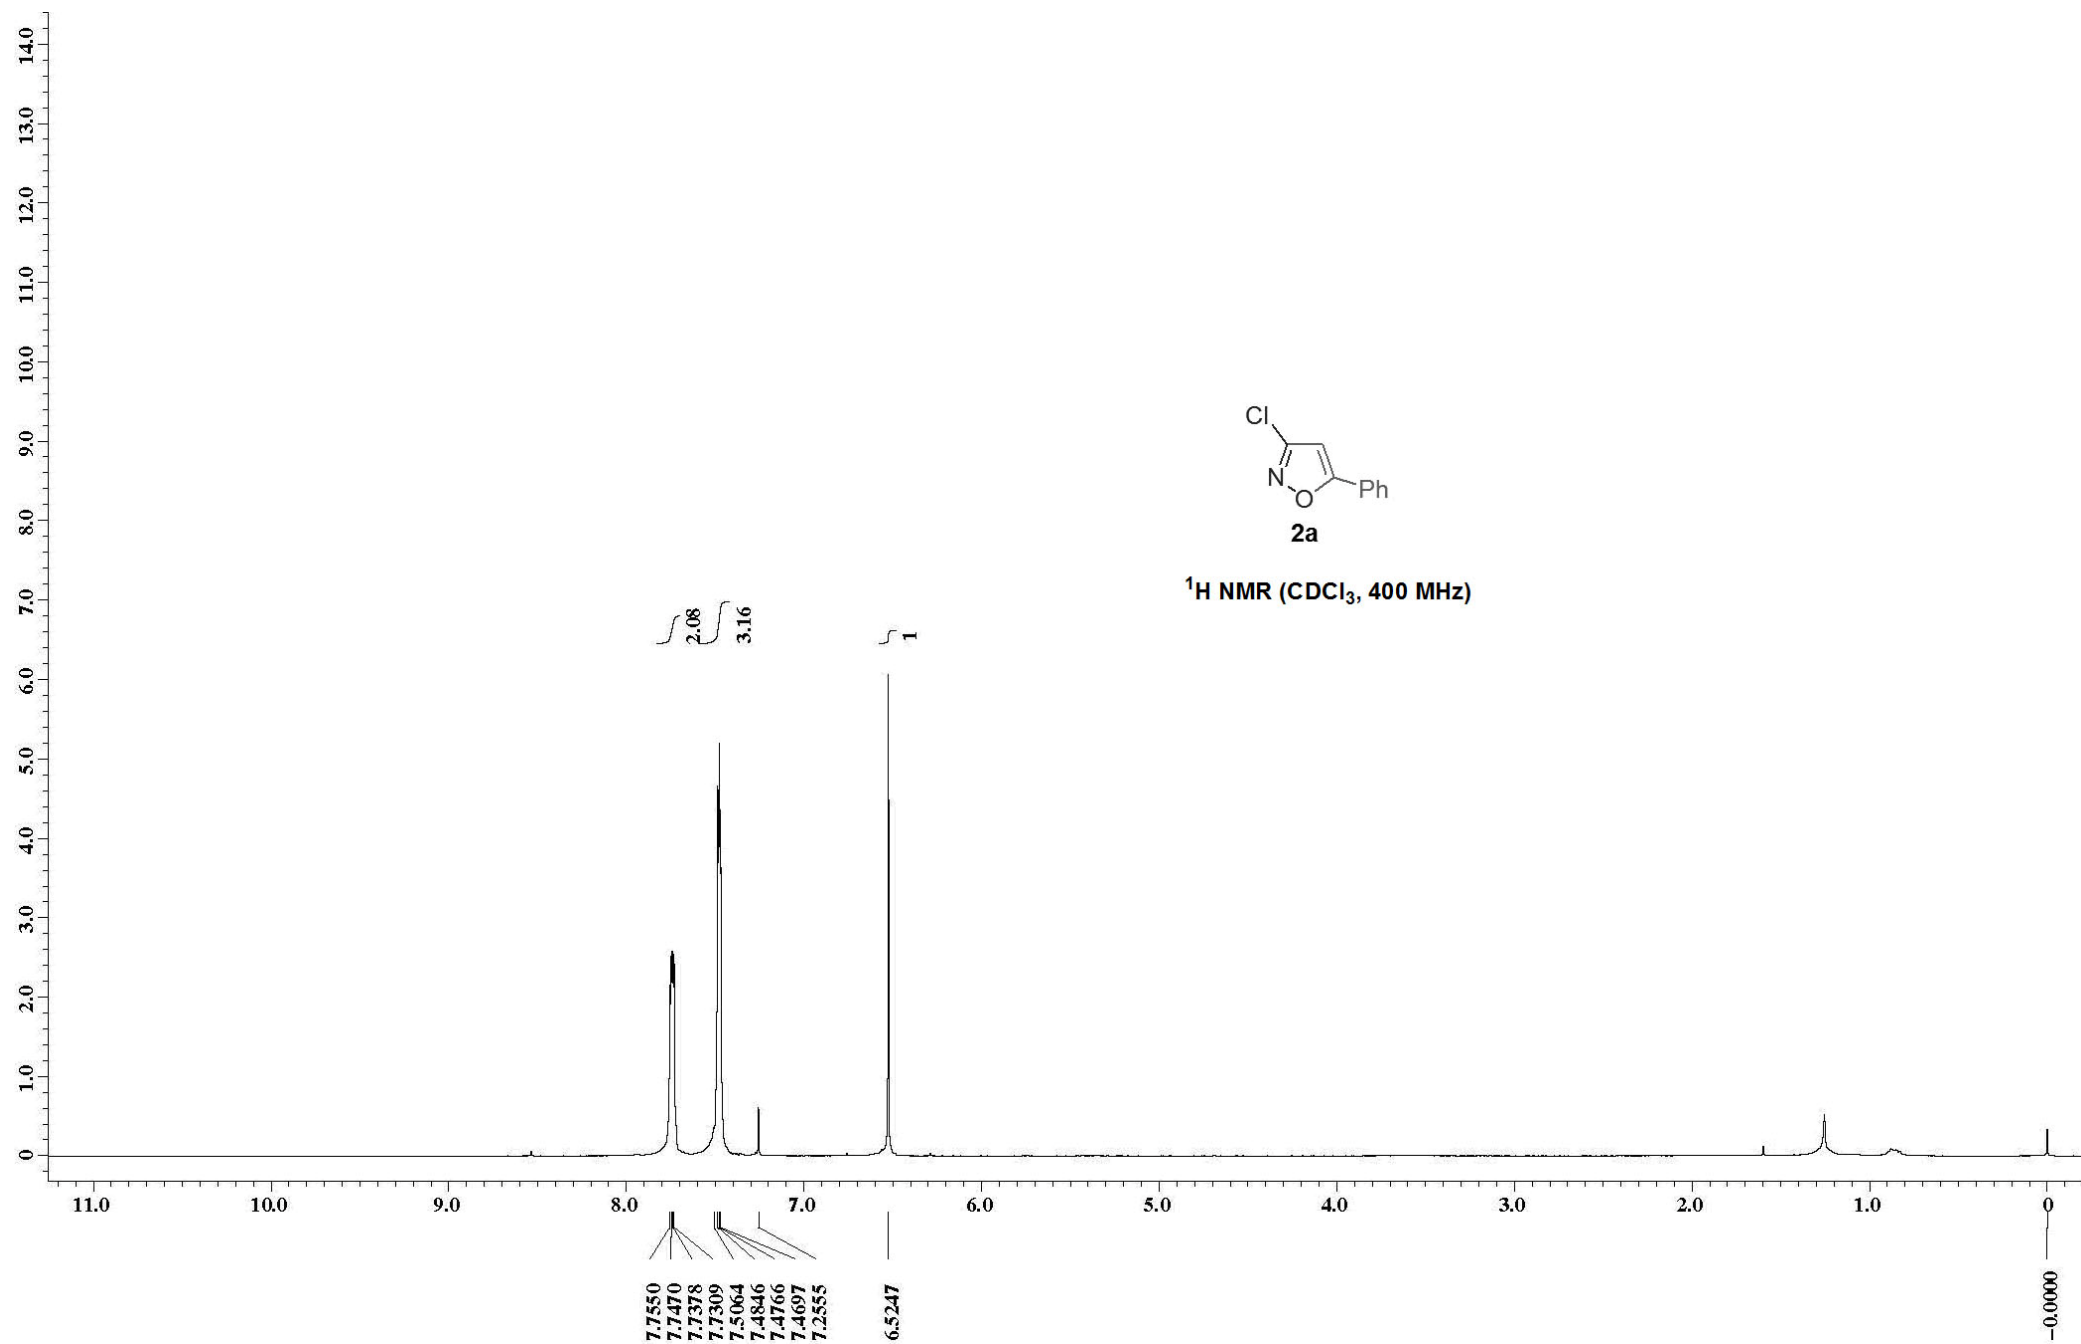

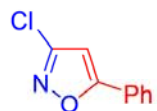

**2a**

$^{13}\text{C}$  NMR ( $\text{CDCl}_3$ , 75 MHz)

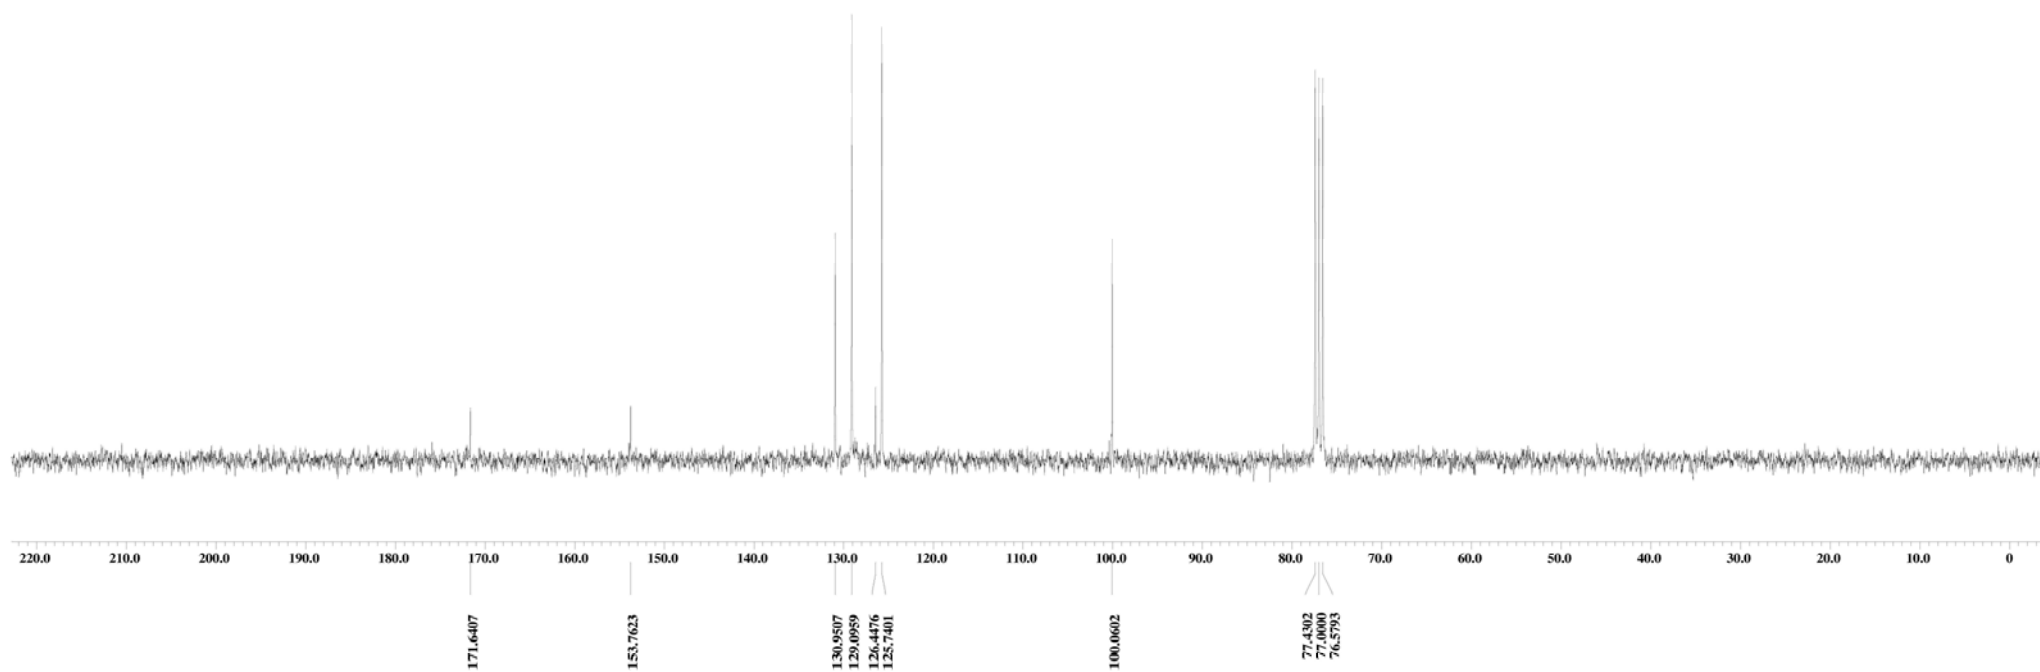

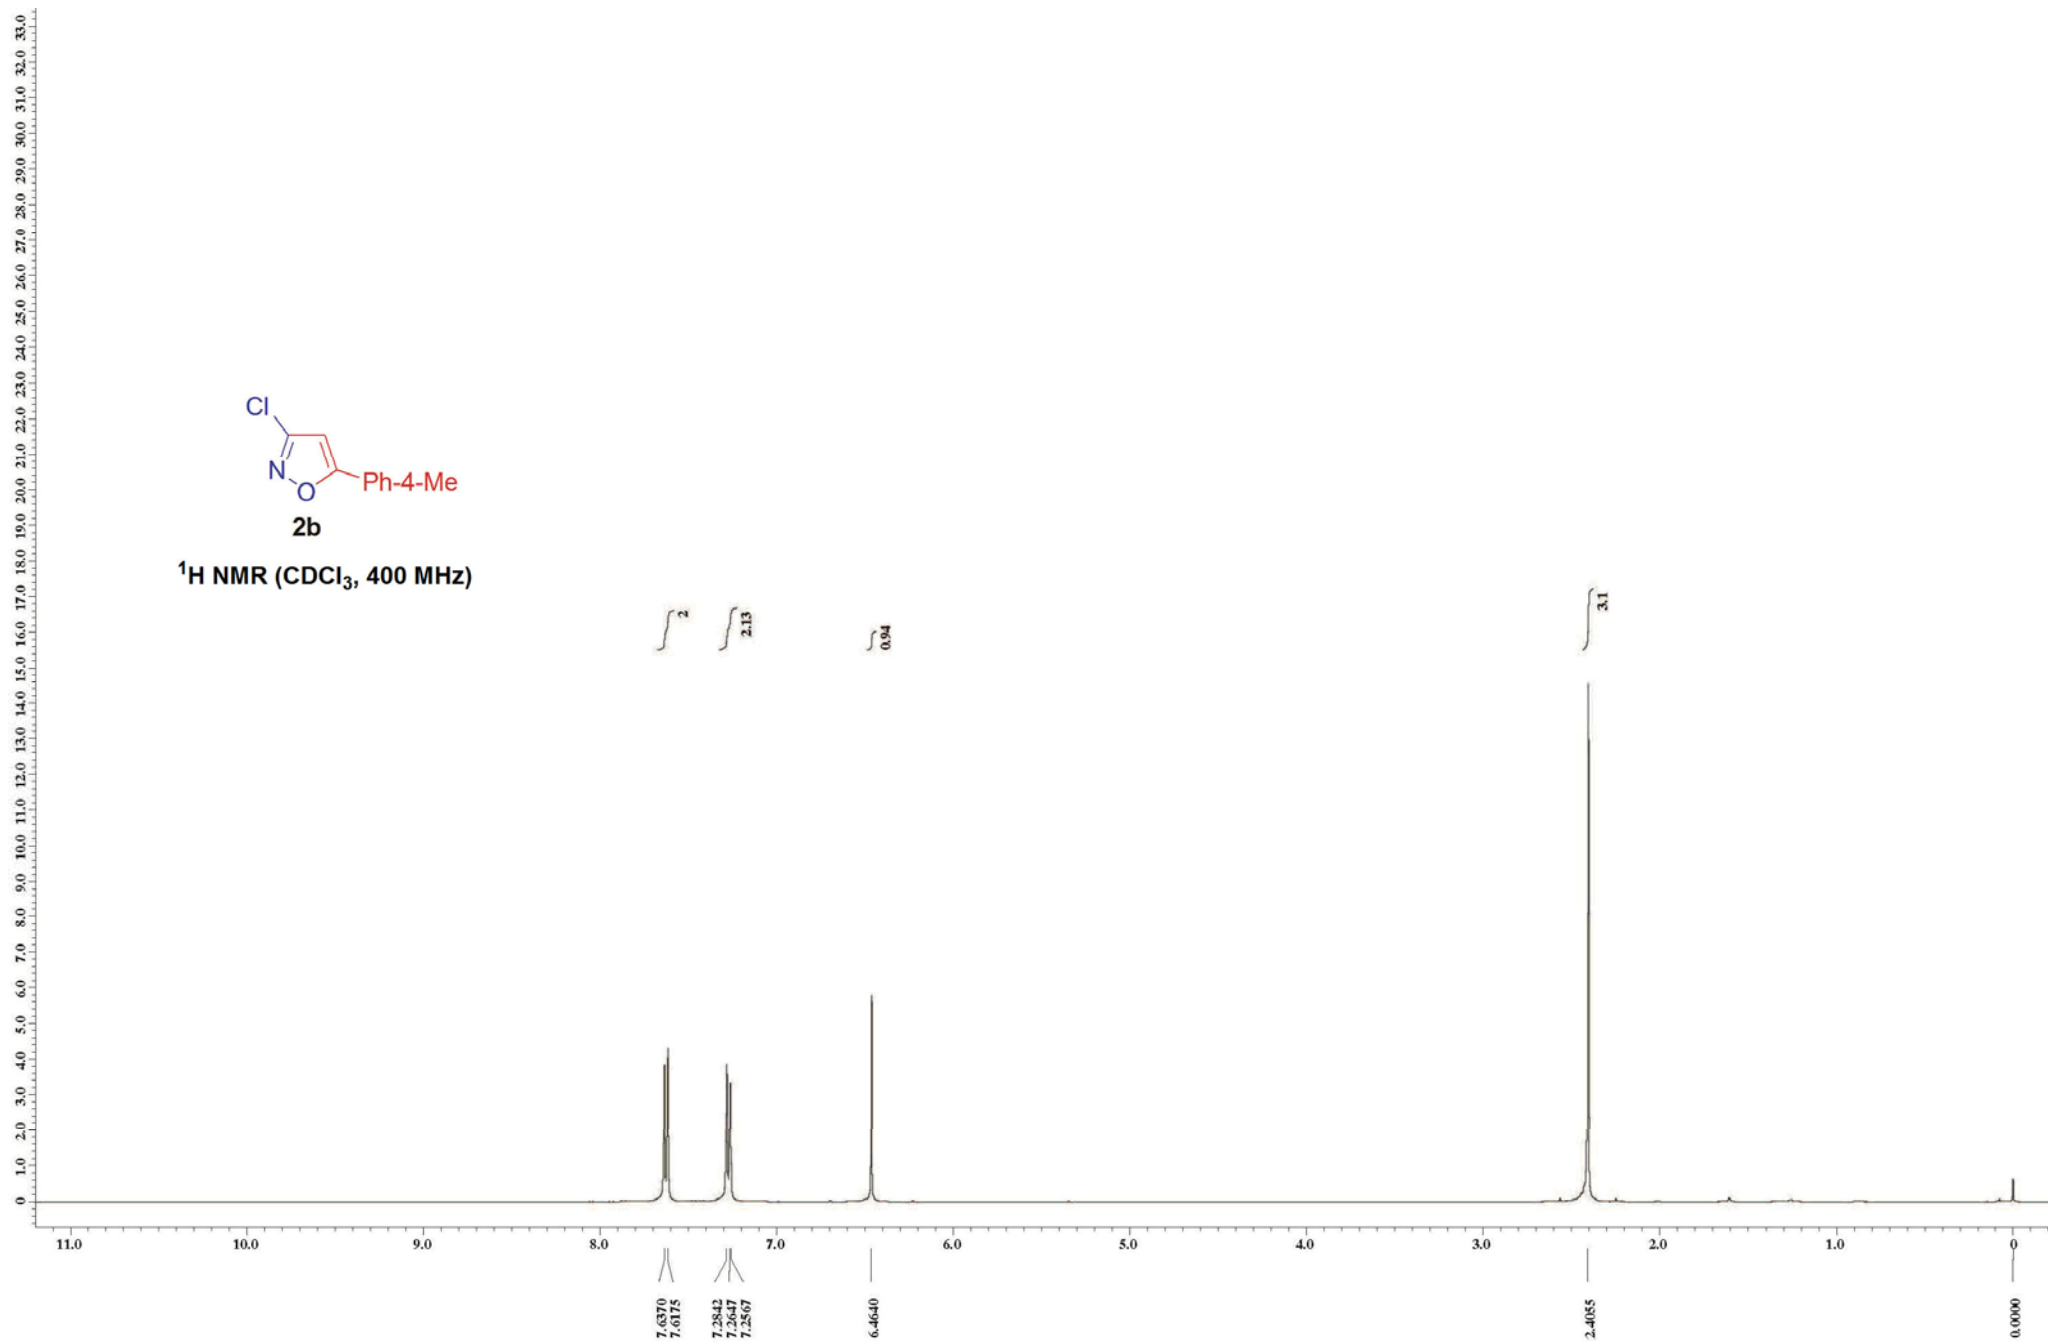

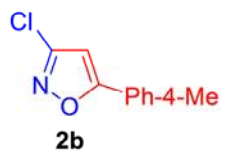

**$^{13}\text{C}$  NMR ( $\text{CDCl}_3$ , 75 MHz)**

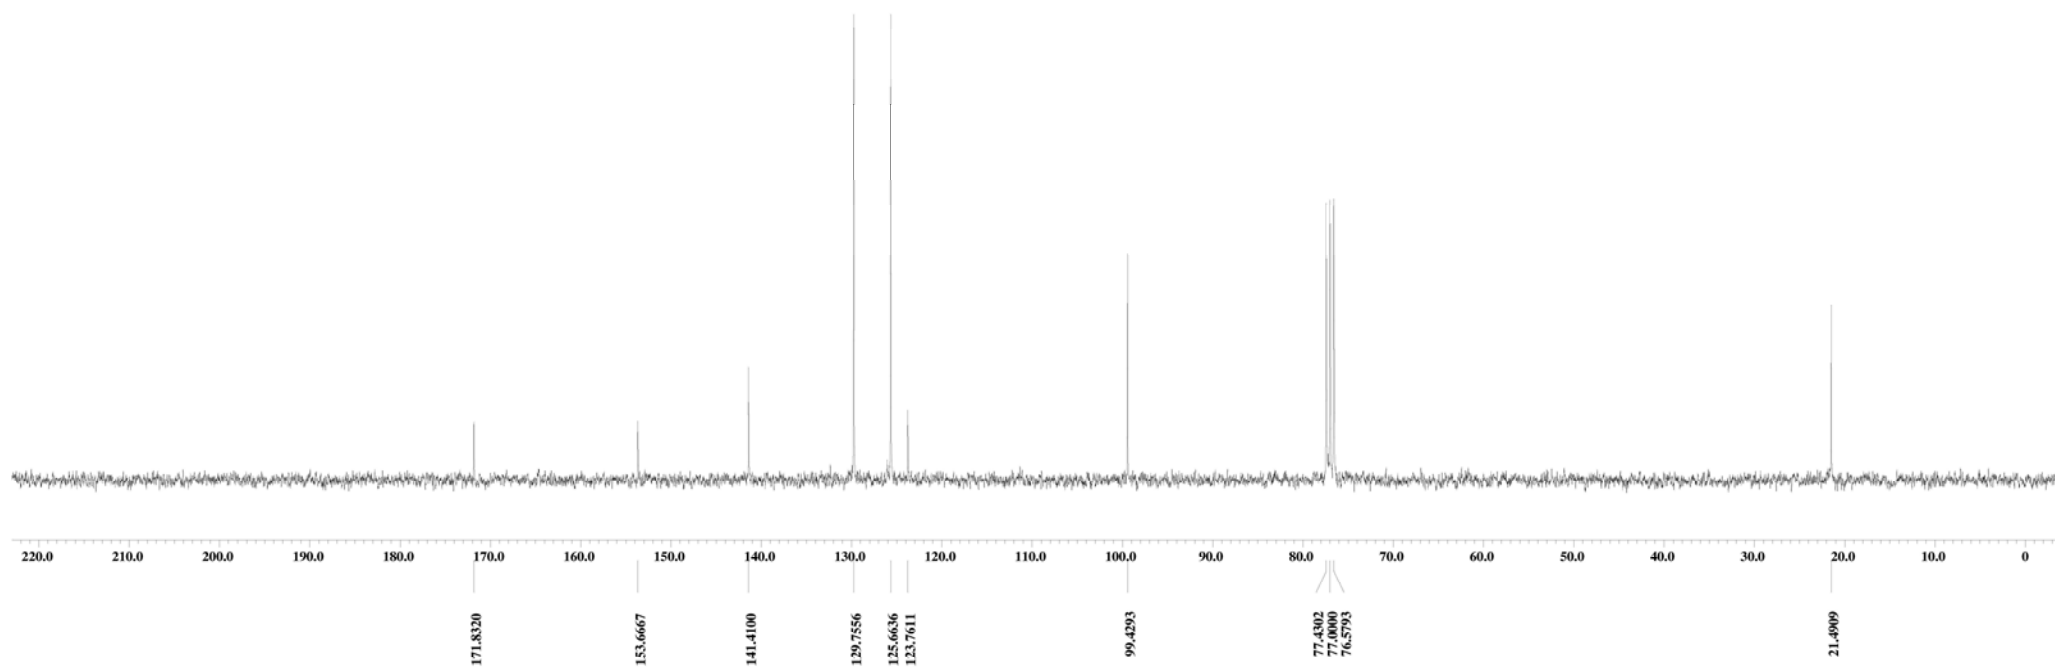

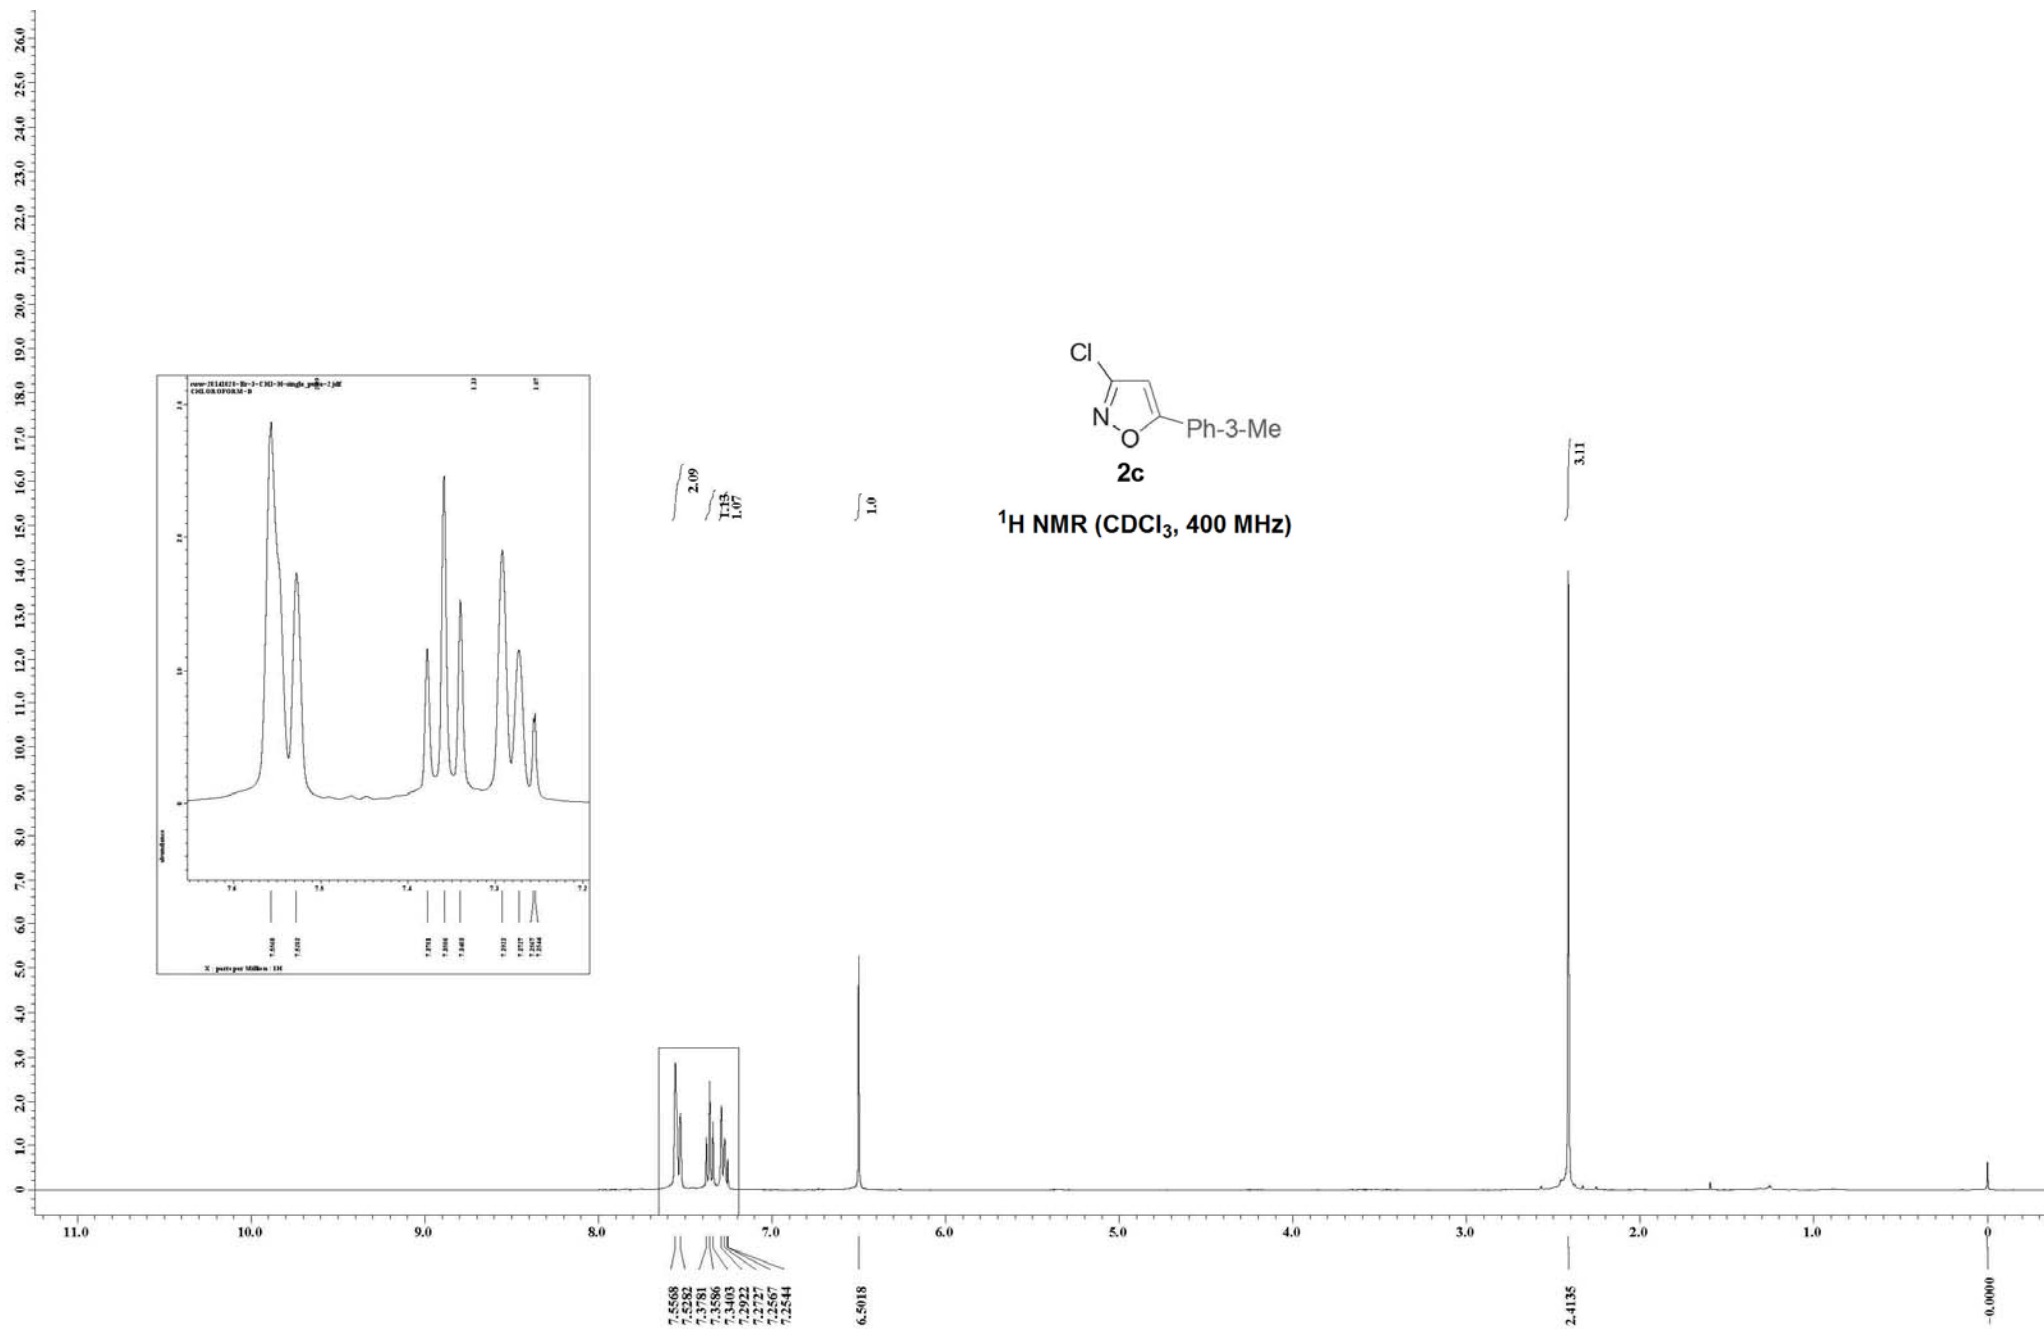



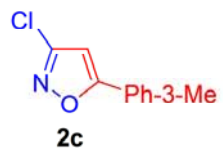

$^{13}\text{C}$  NMR ( $\text{CDCl}_3$ , 75 MHz)

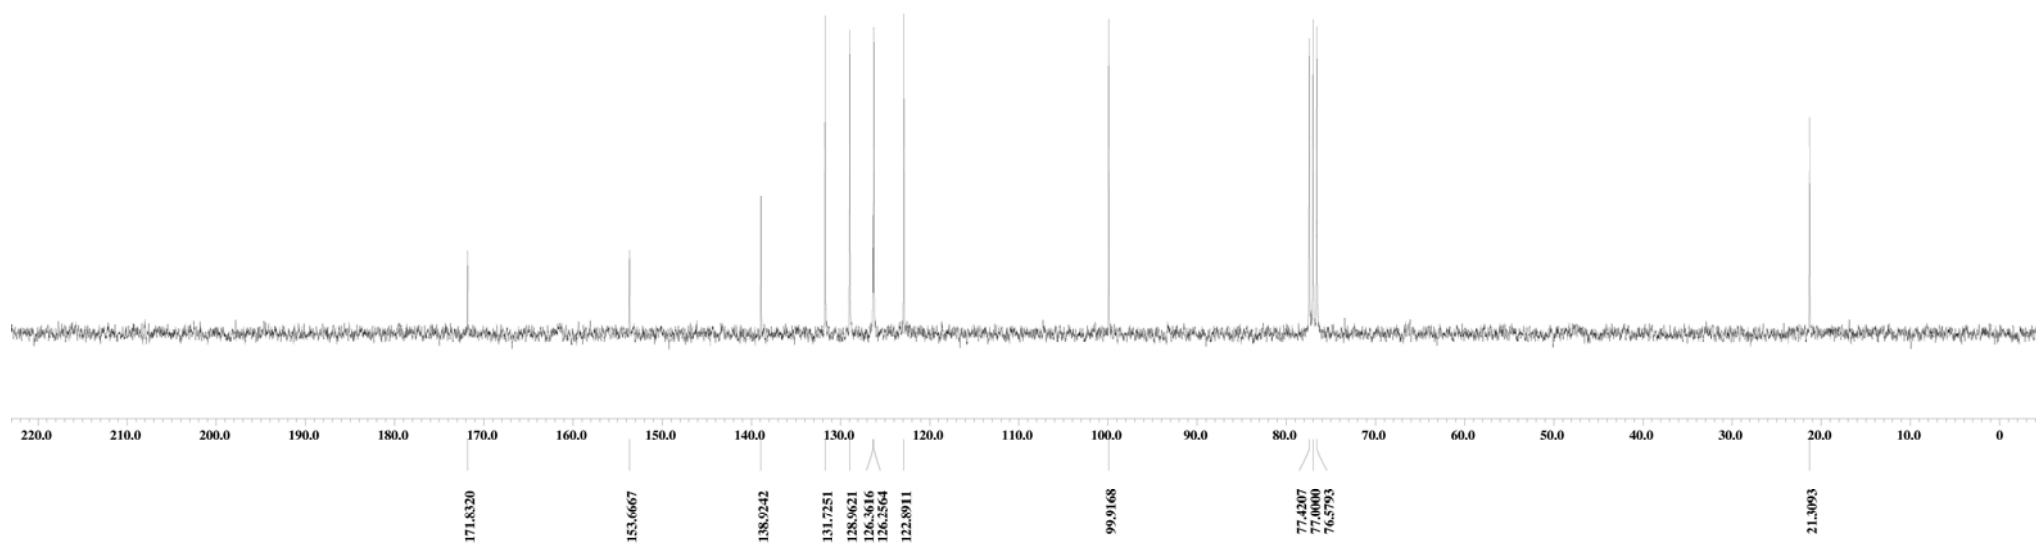

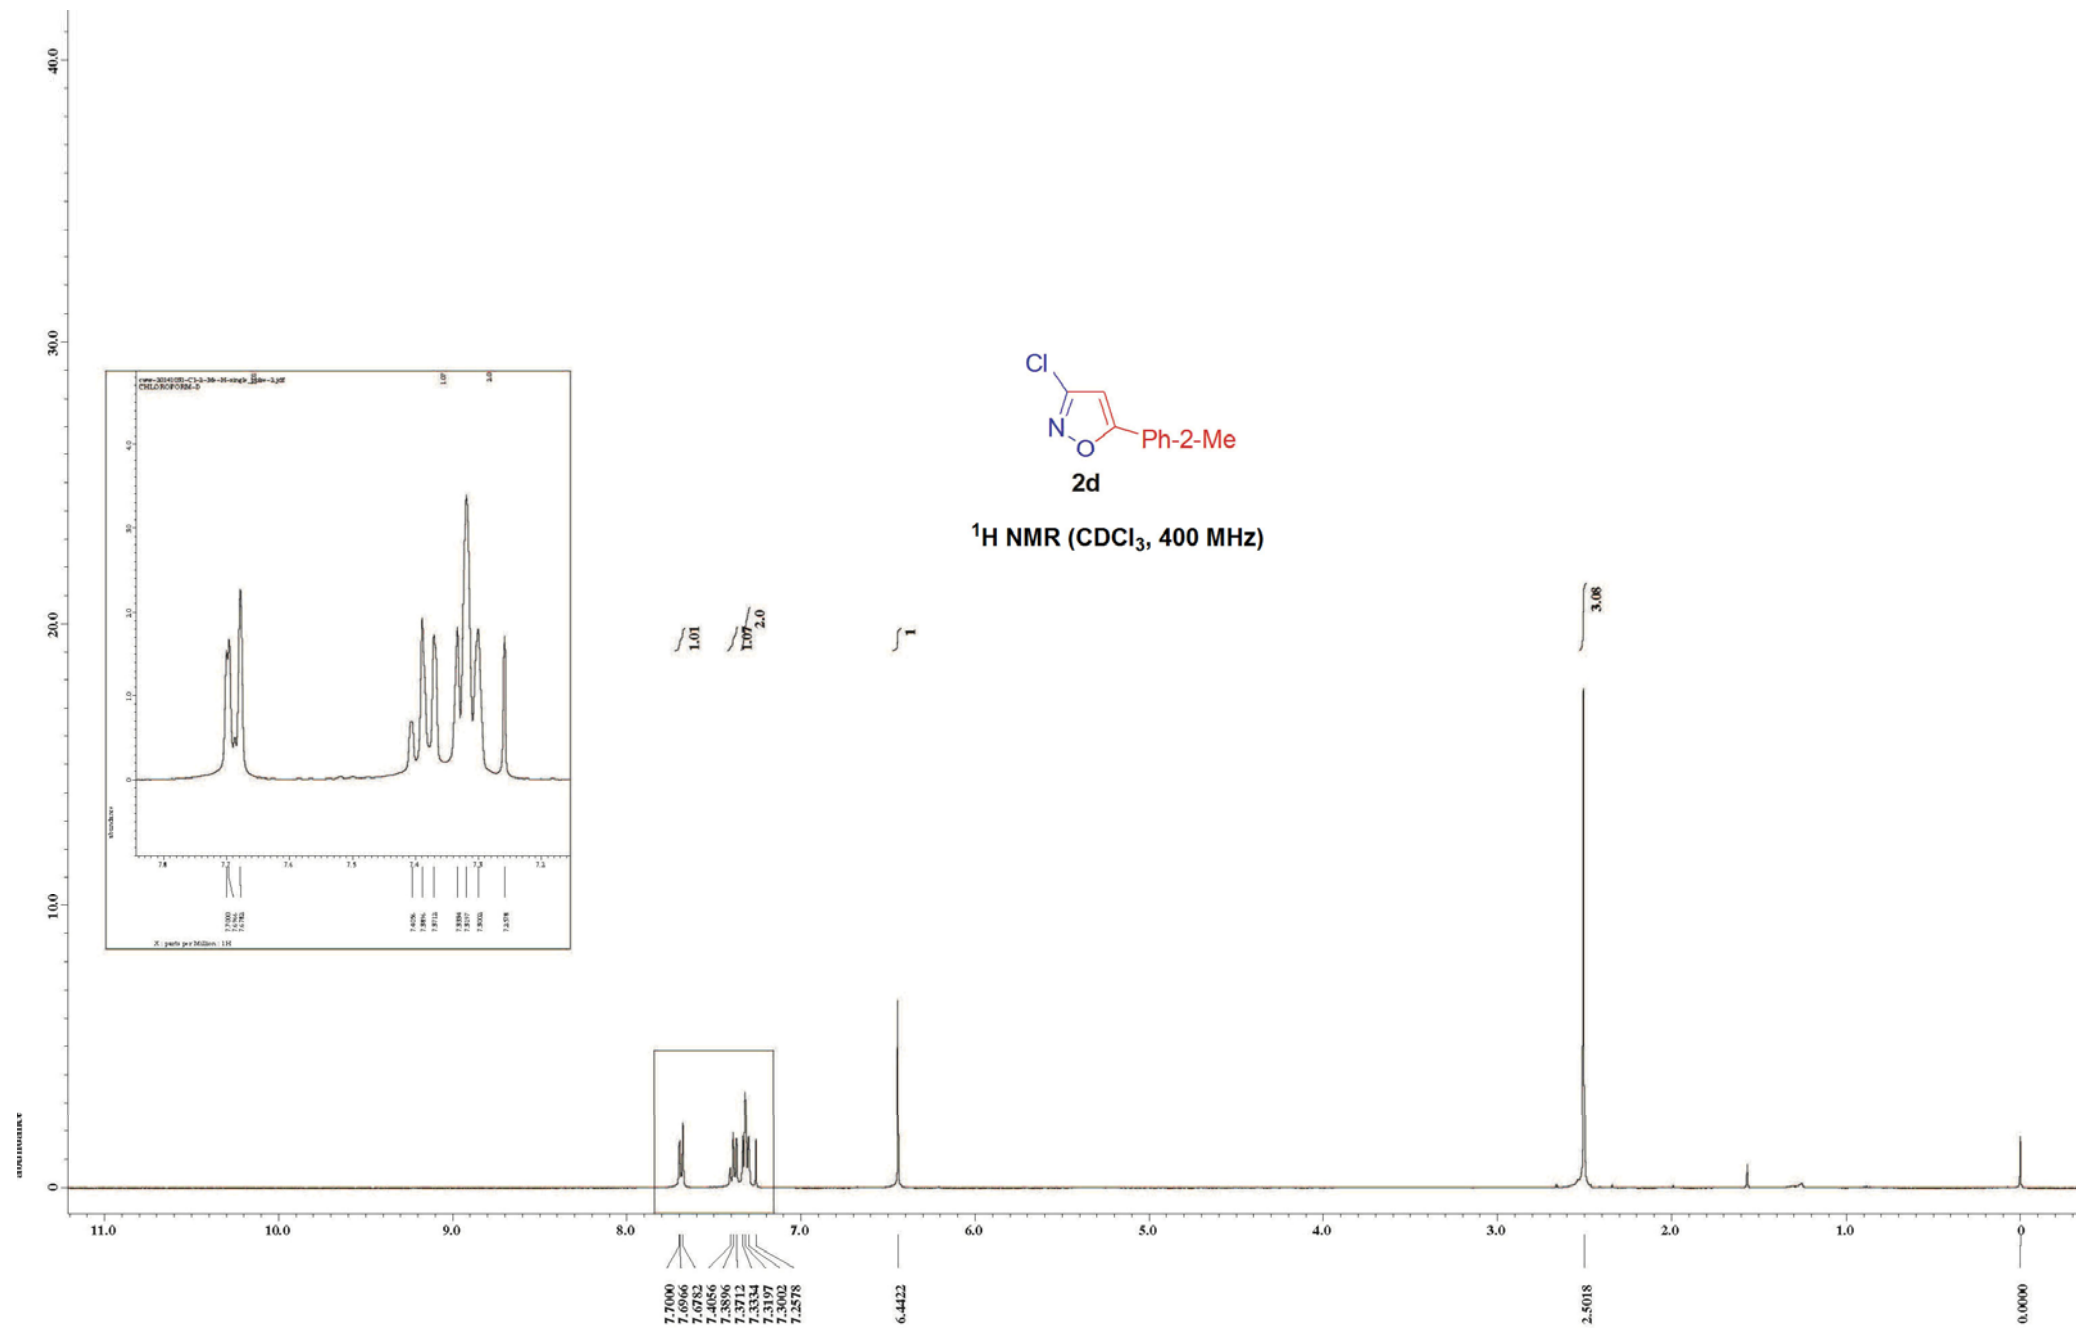

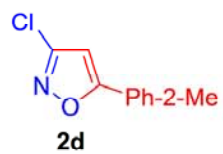

$^{13}\text{C}$  NMR ( $\text{CDCl}_3$ , 75 MHz)

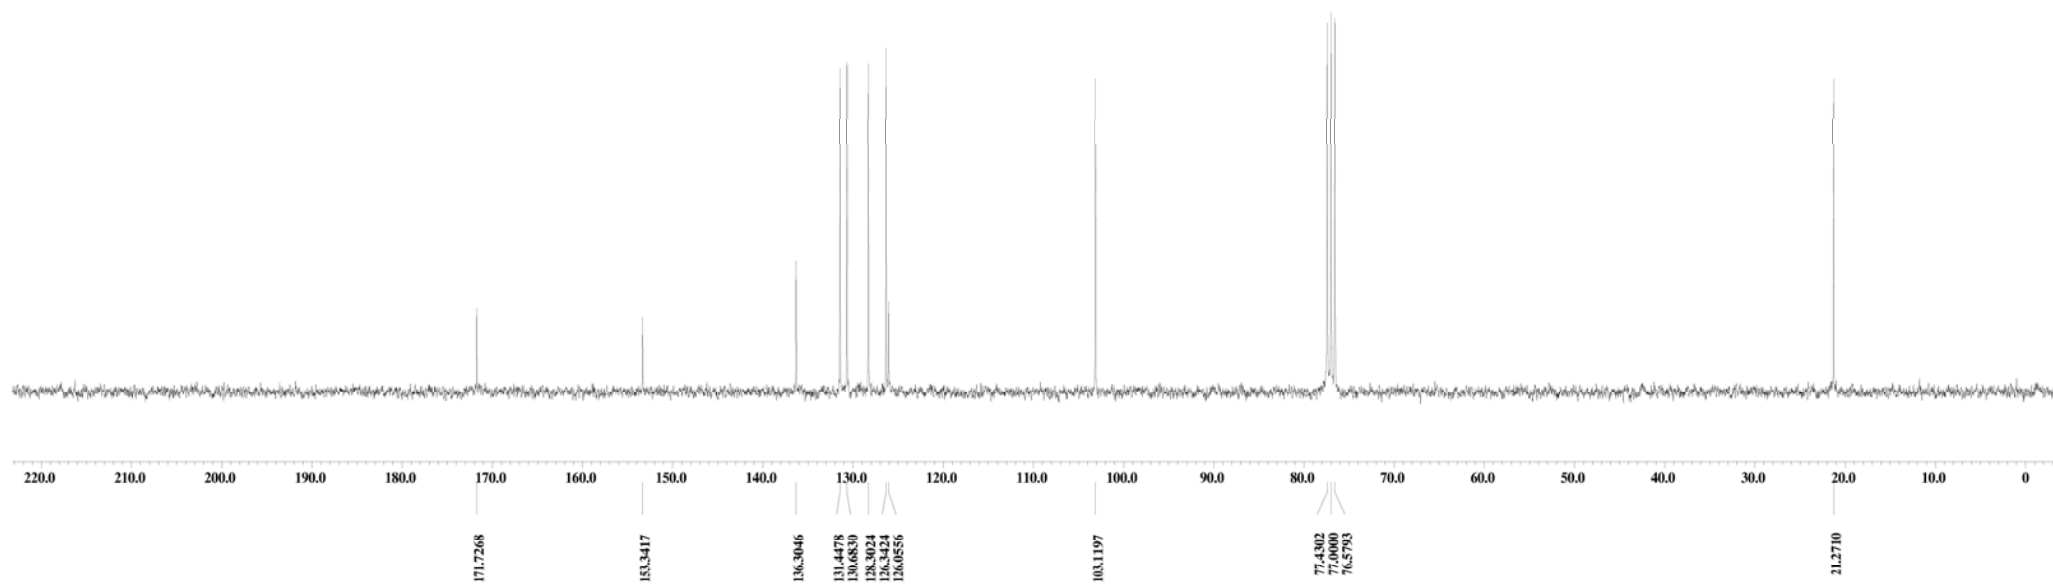

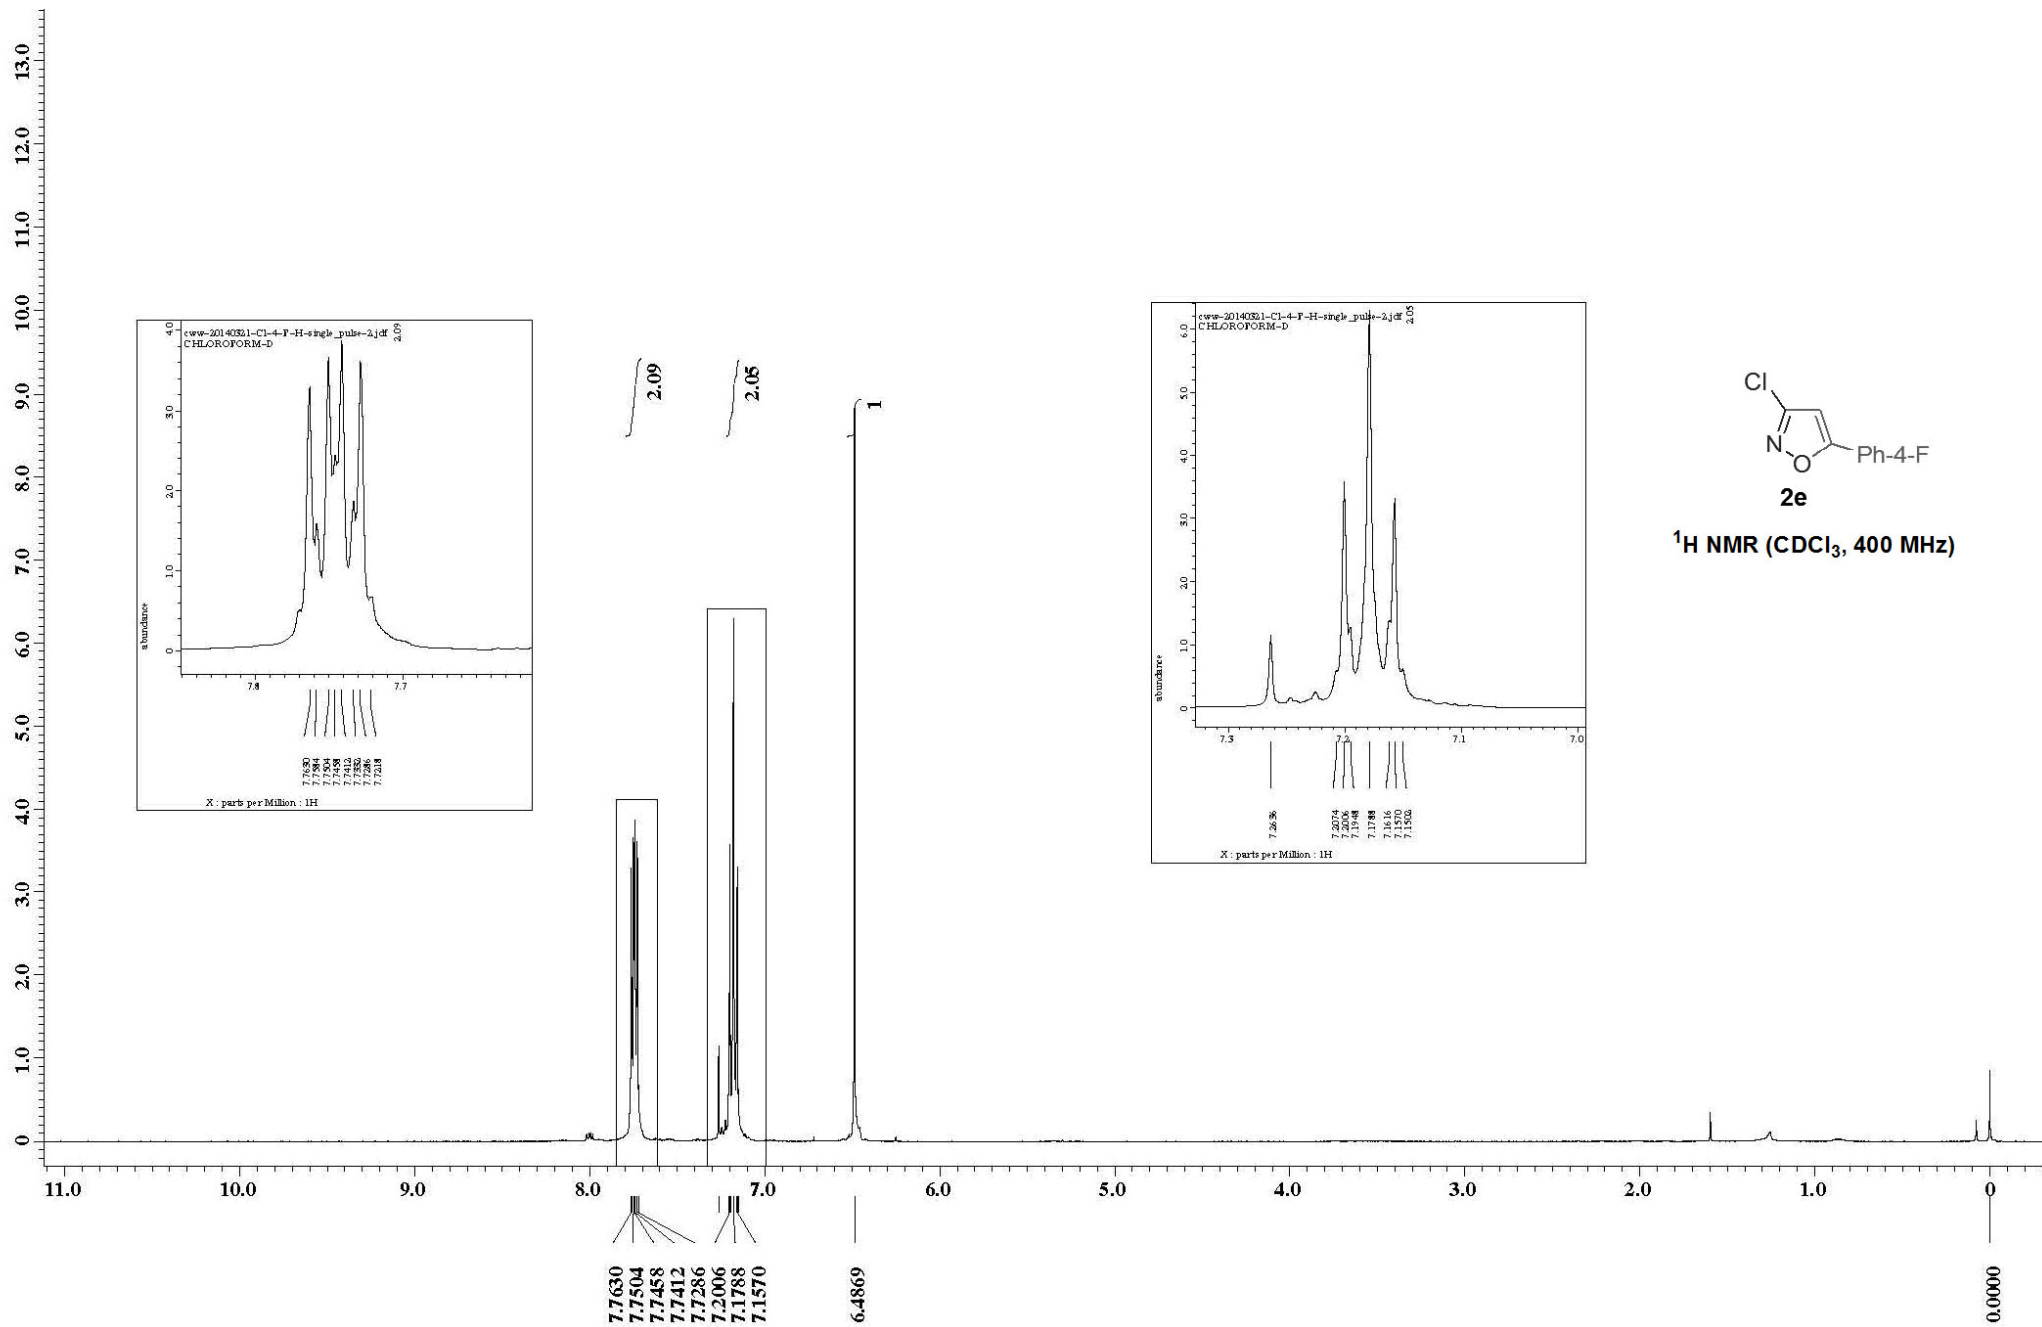

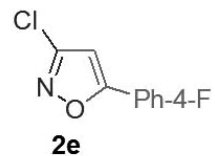

<sup>13</sup>C NMR (CDCl<sub>3</sub>, 75 MHz)

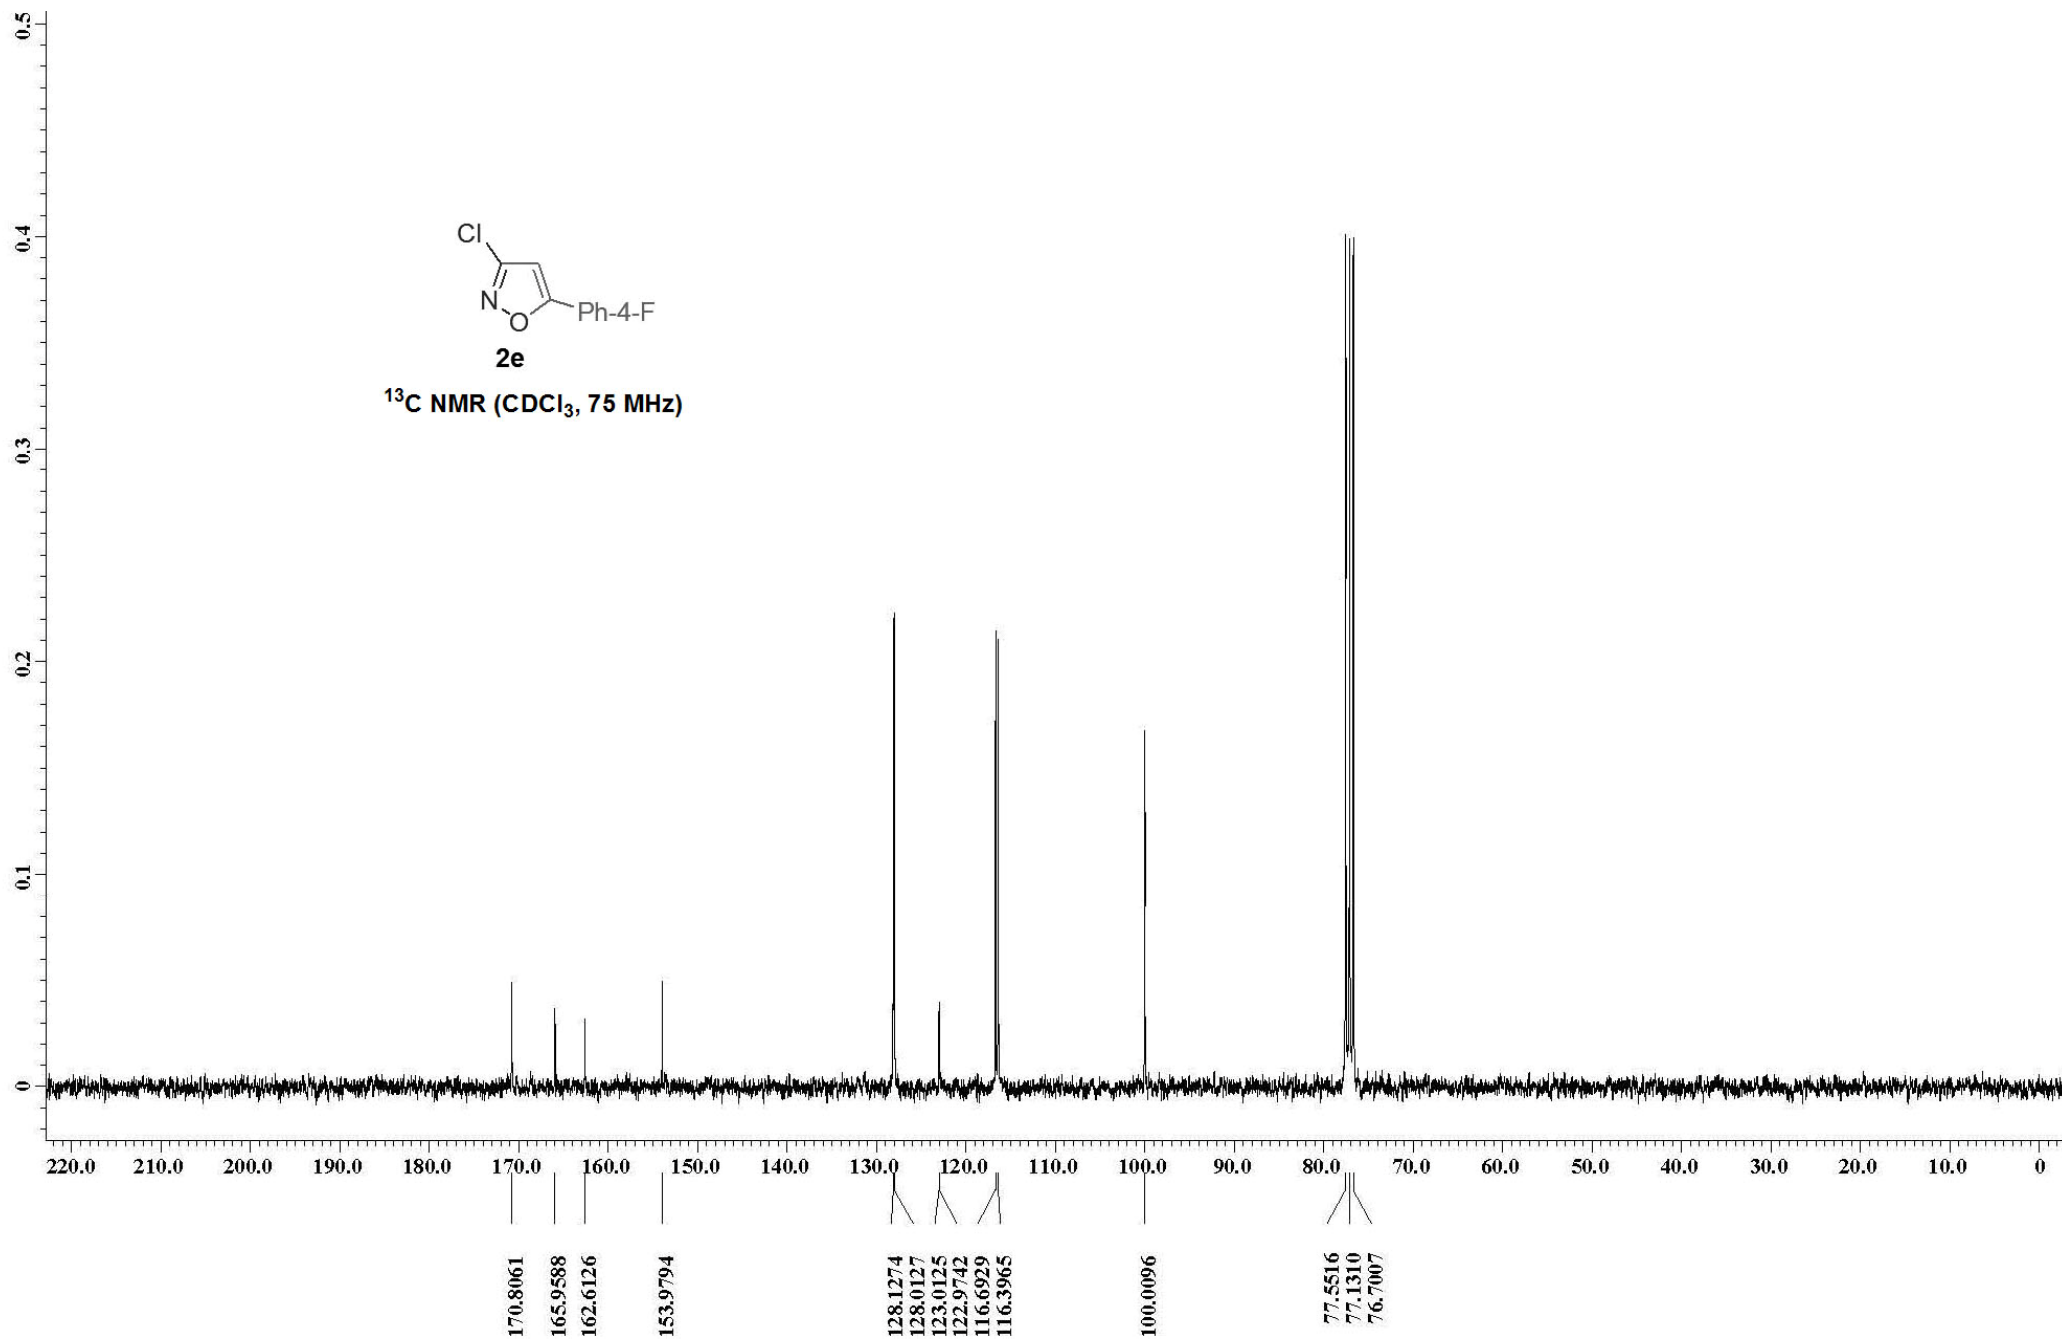

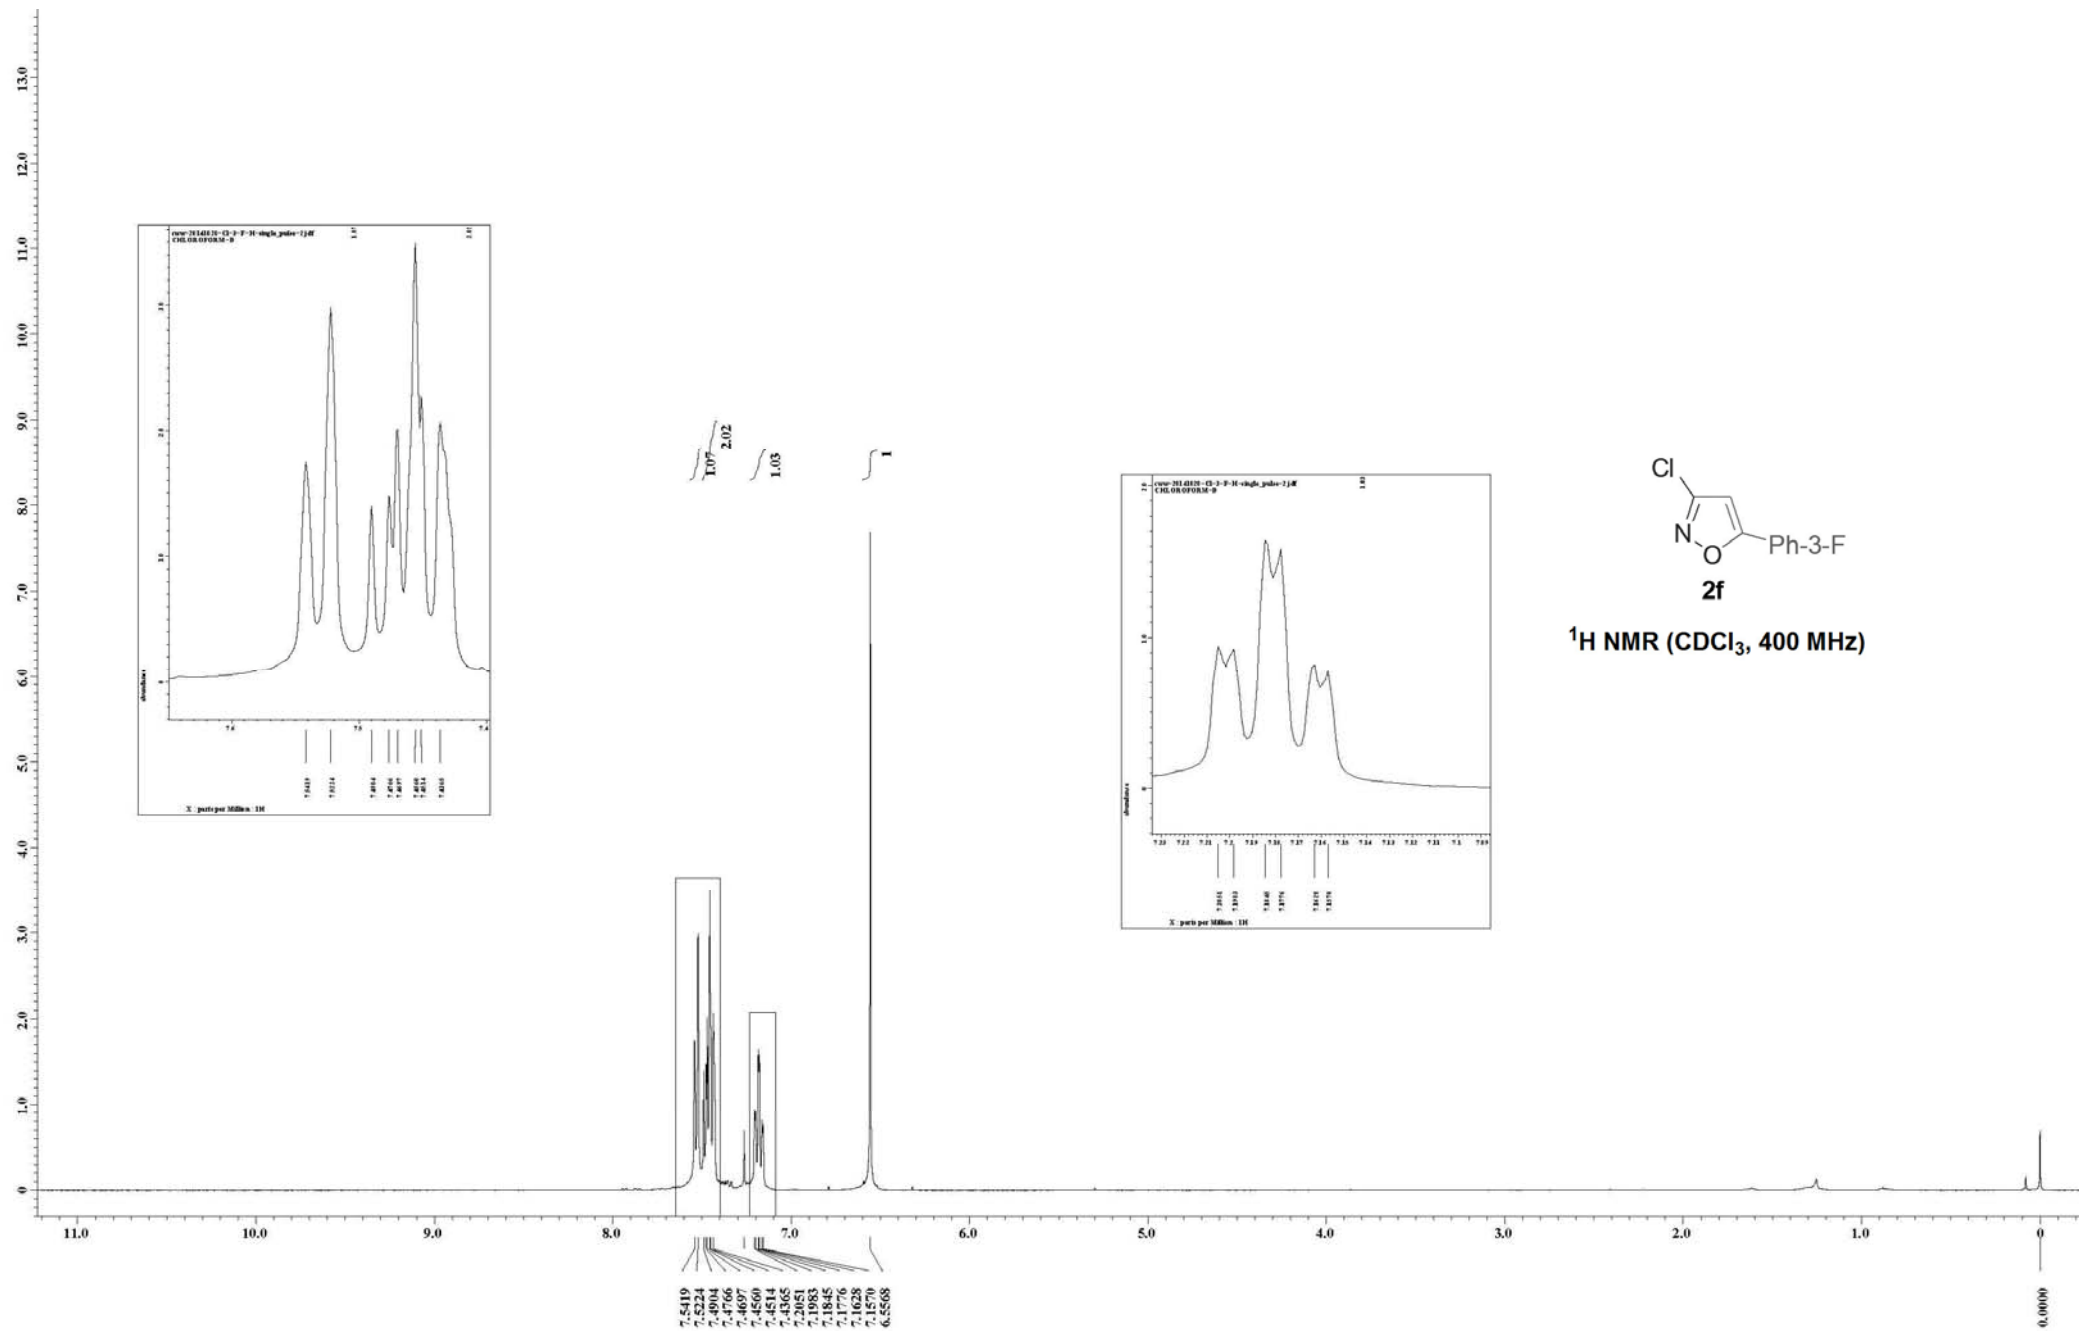

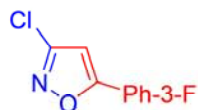

**2f**

**$^{13}\text{C}$  NMR ( $\text{CDCl}_3$ , 75 MHz)**

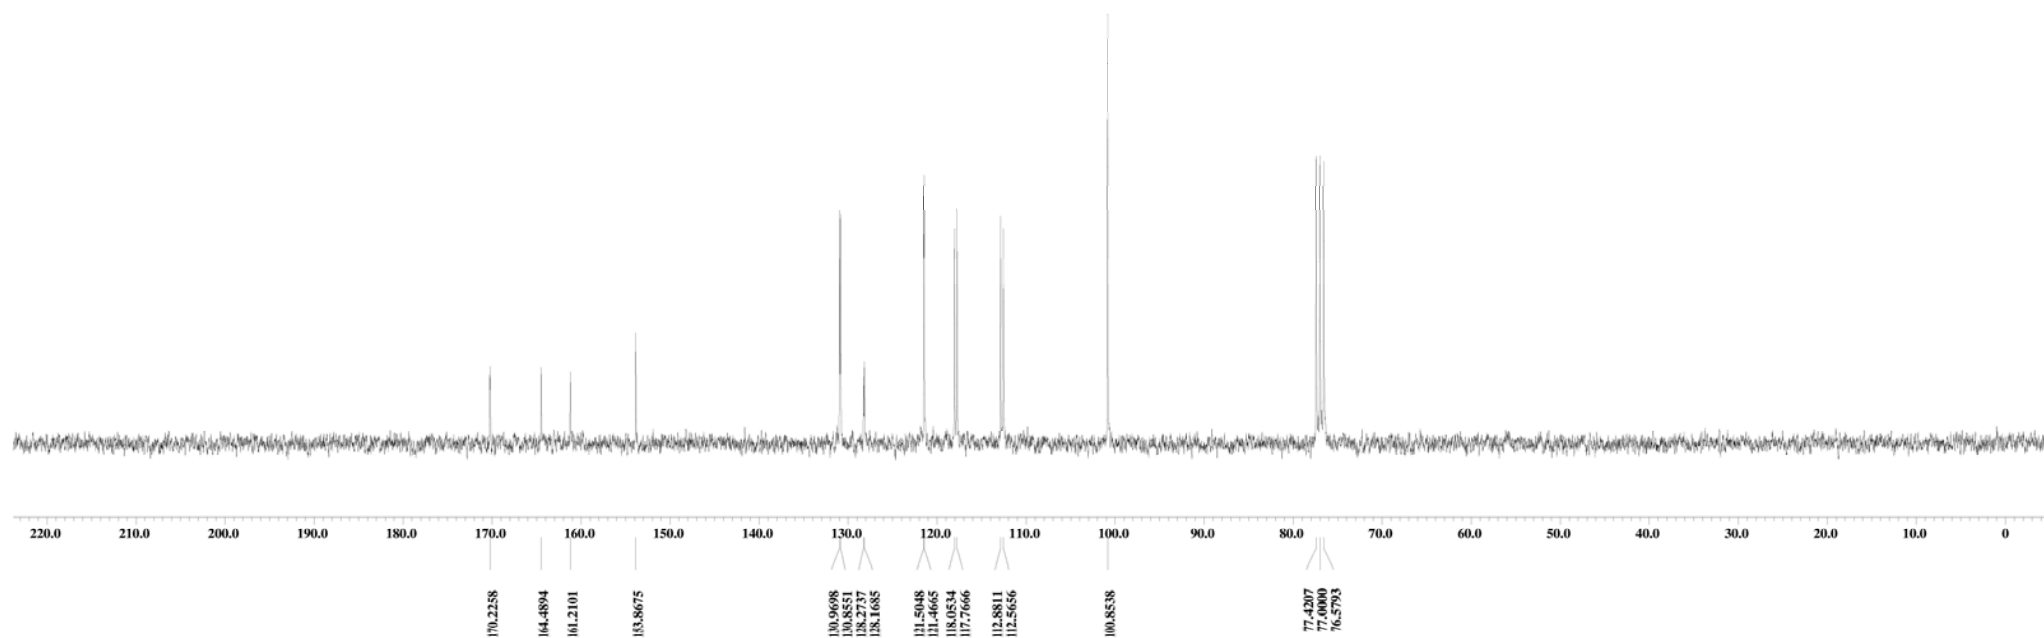

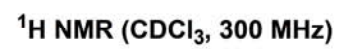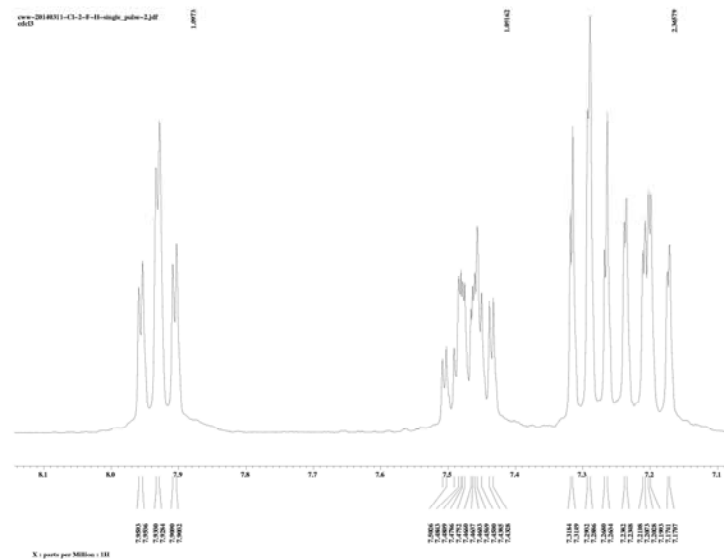



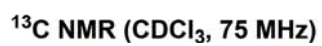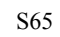

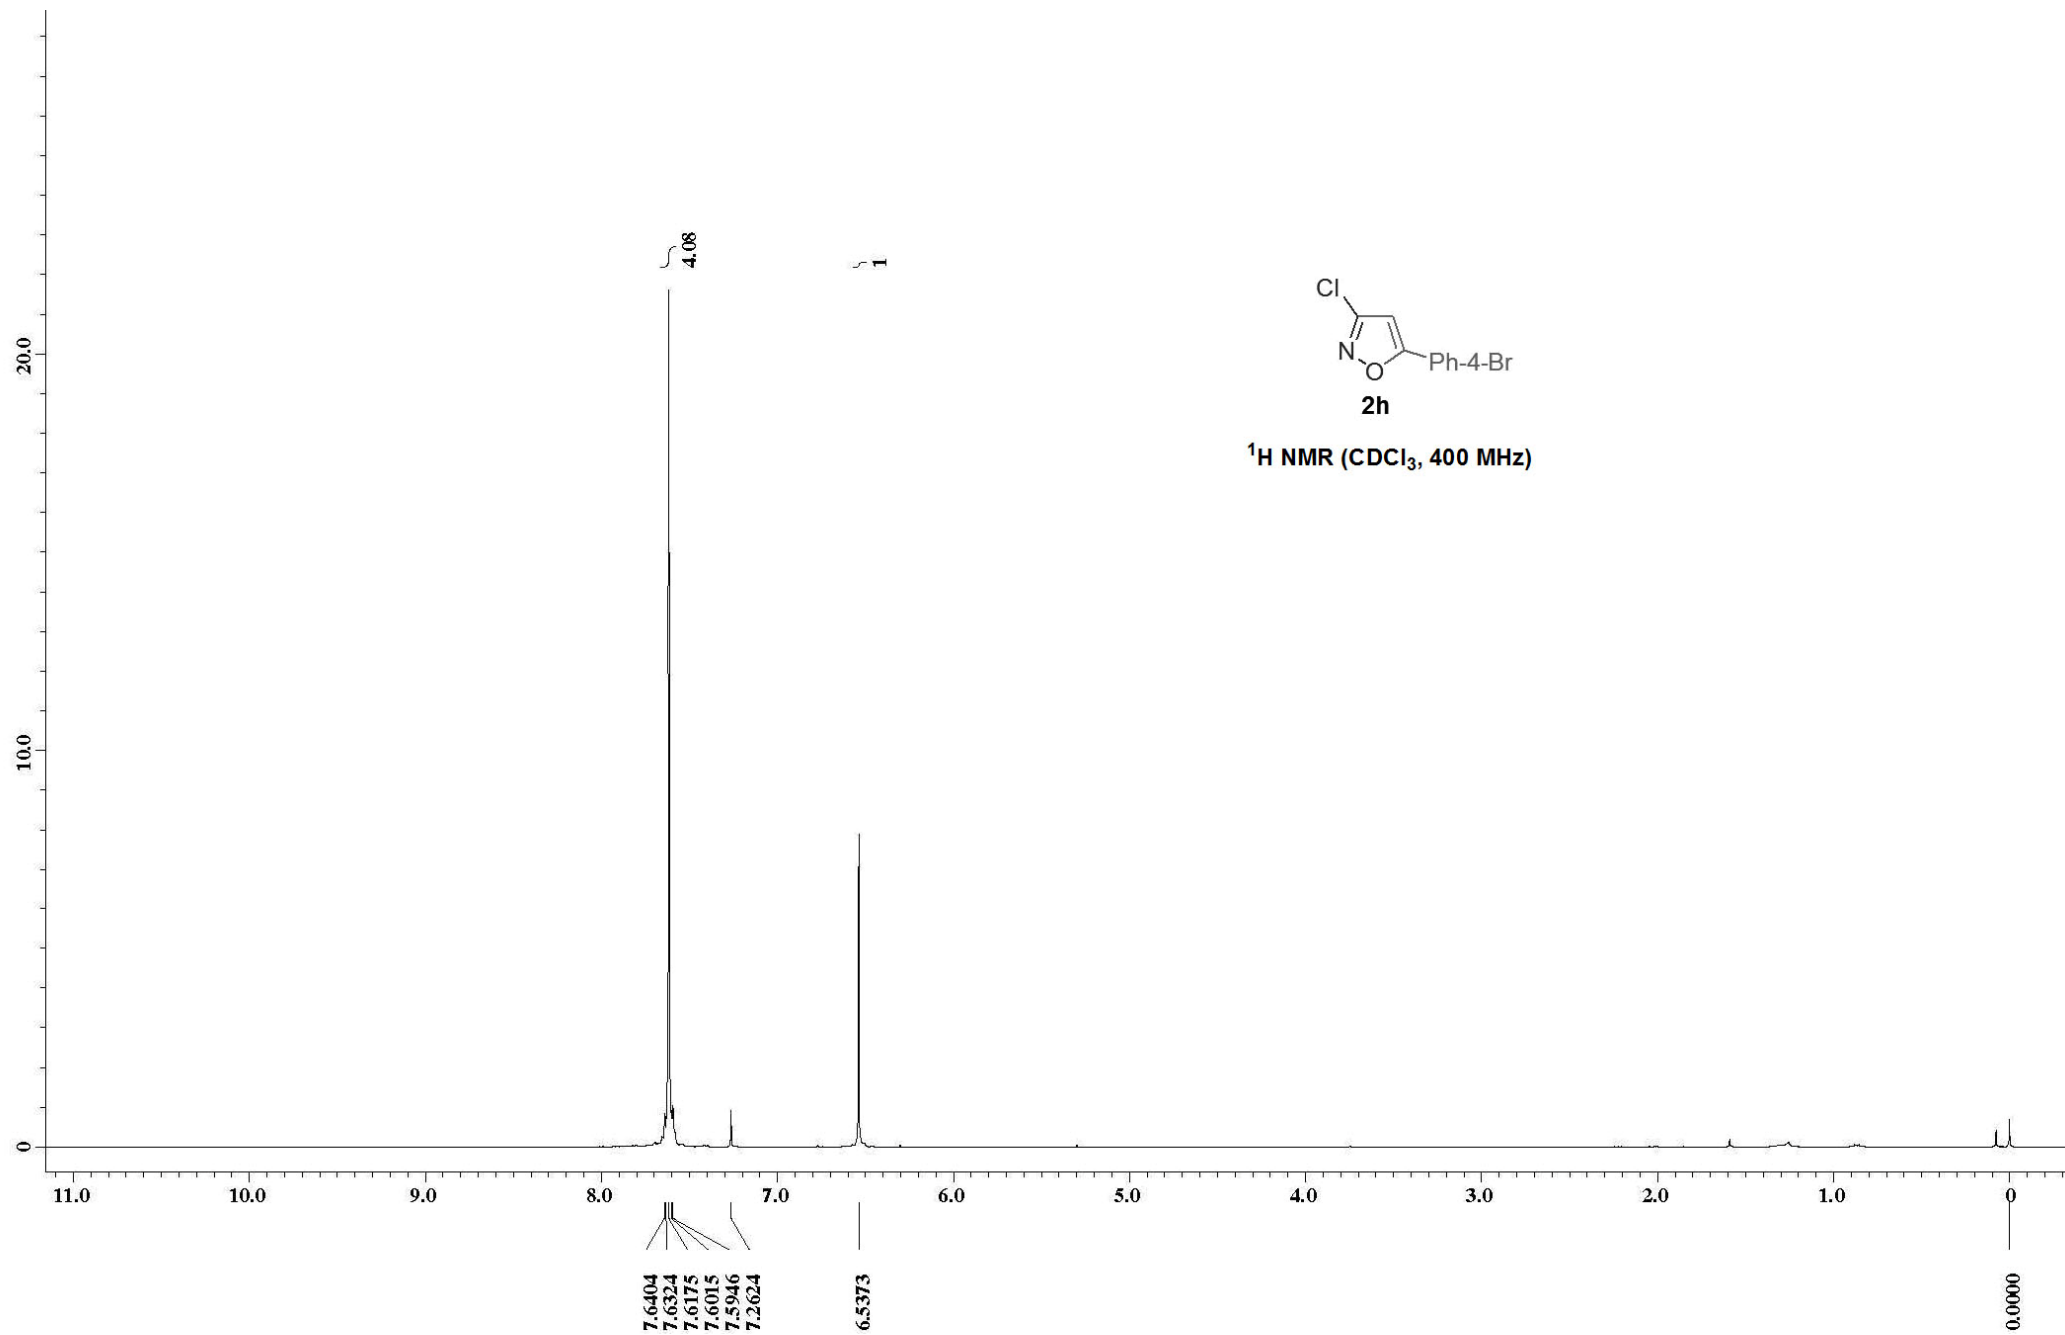

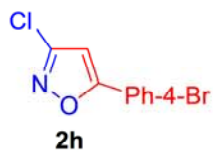

$^{13}\text{C}$  NMR ( $\text{CDCl}_3$ , 75 MHz)

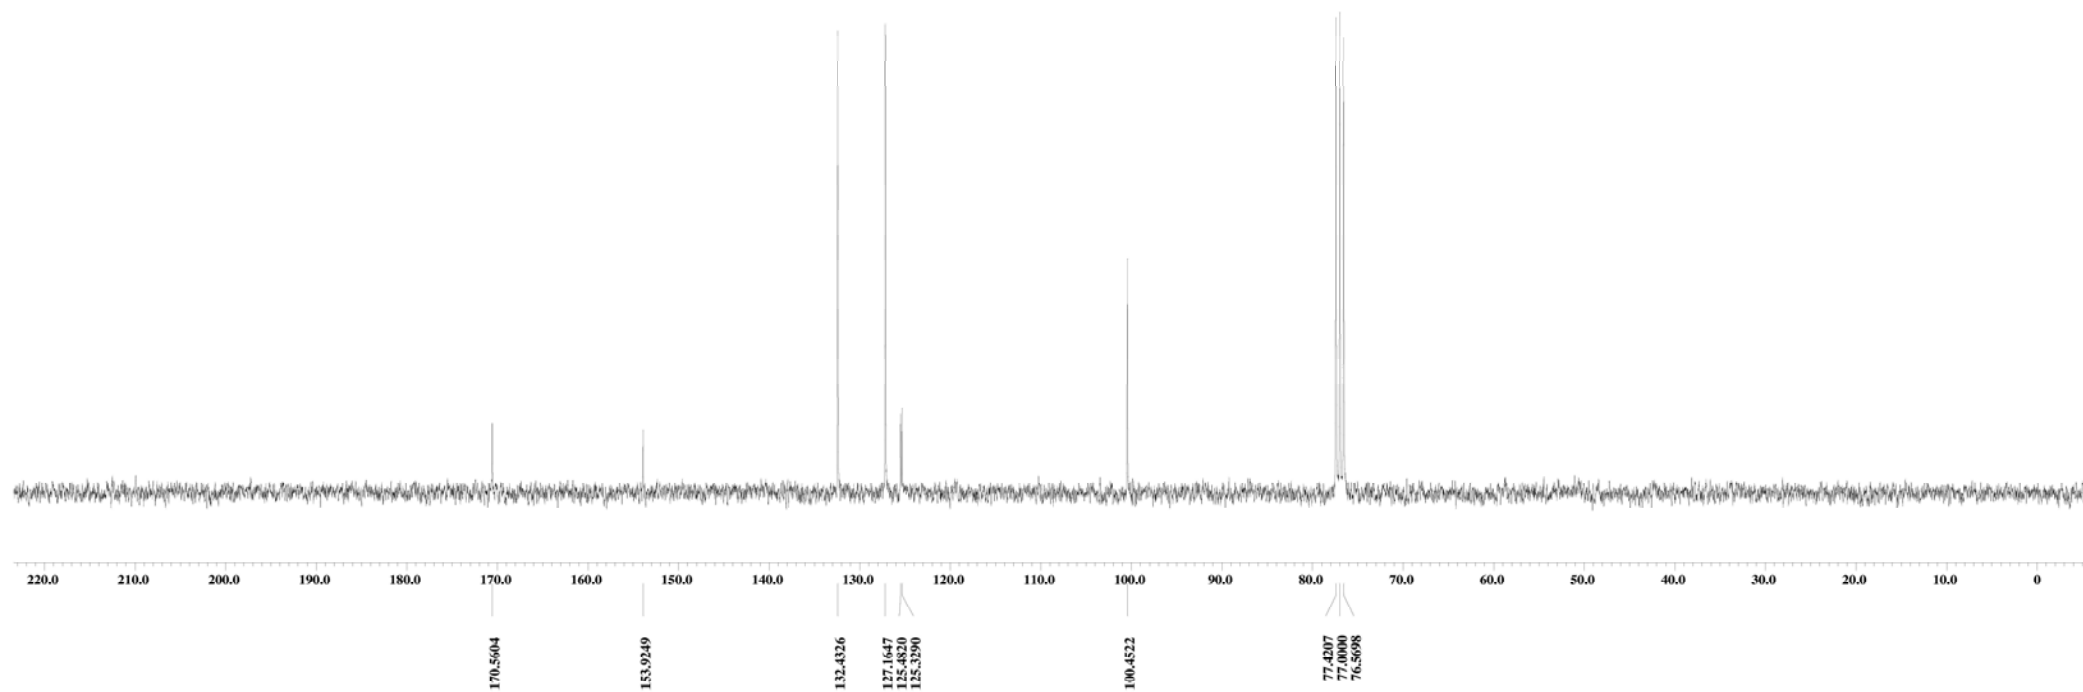

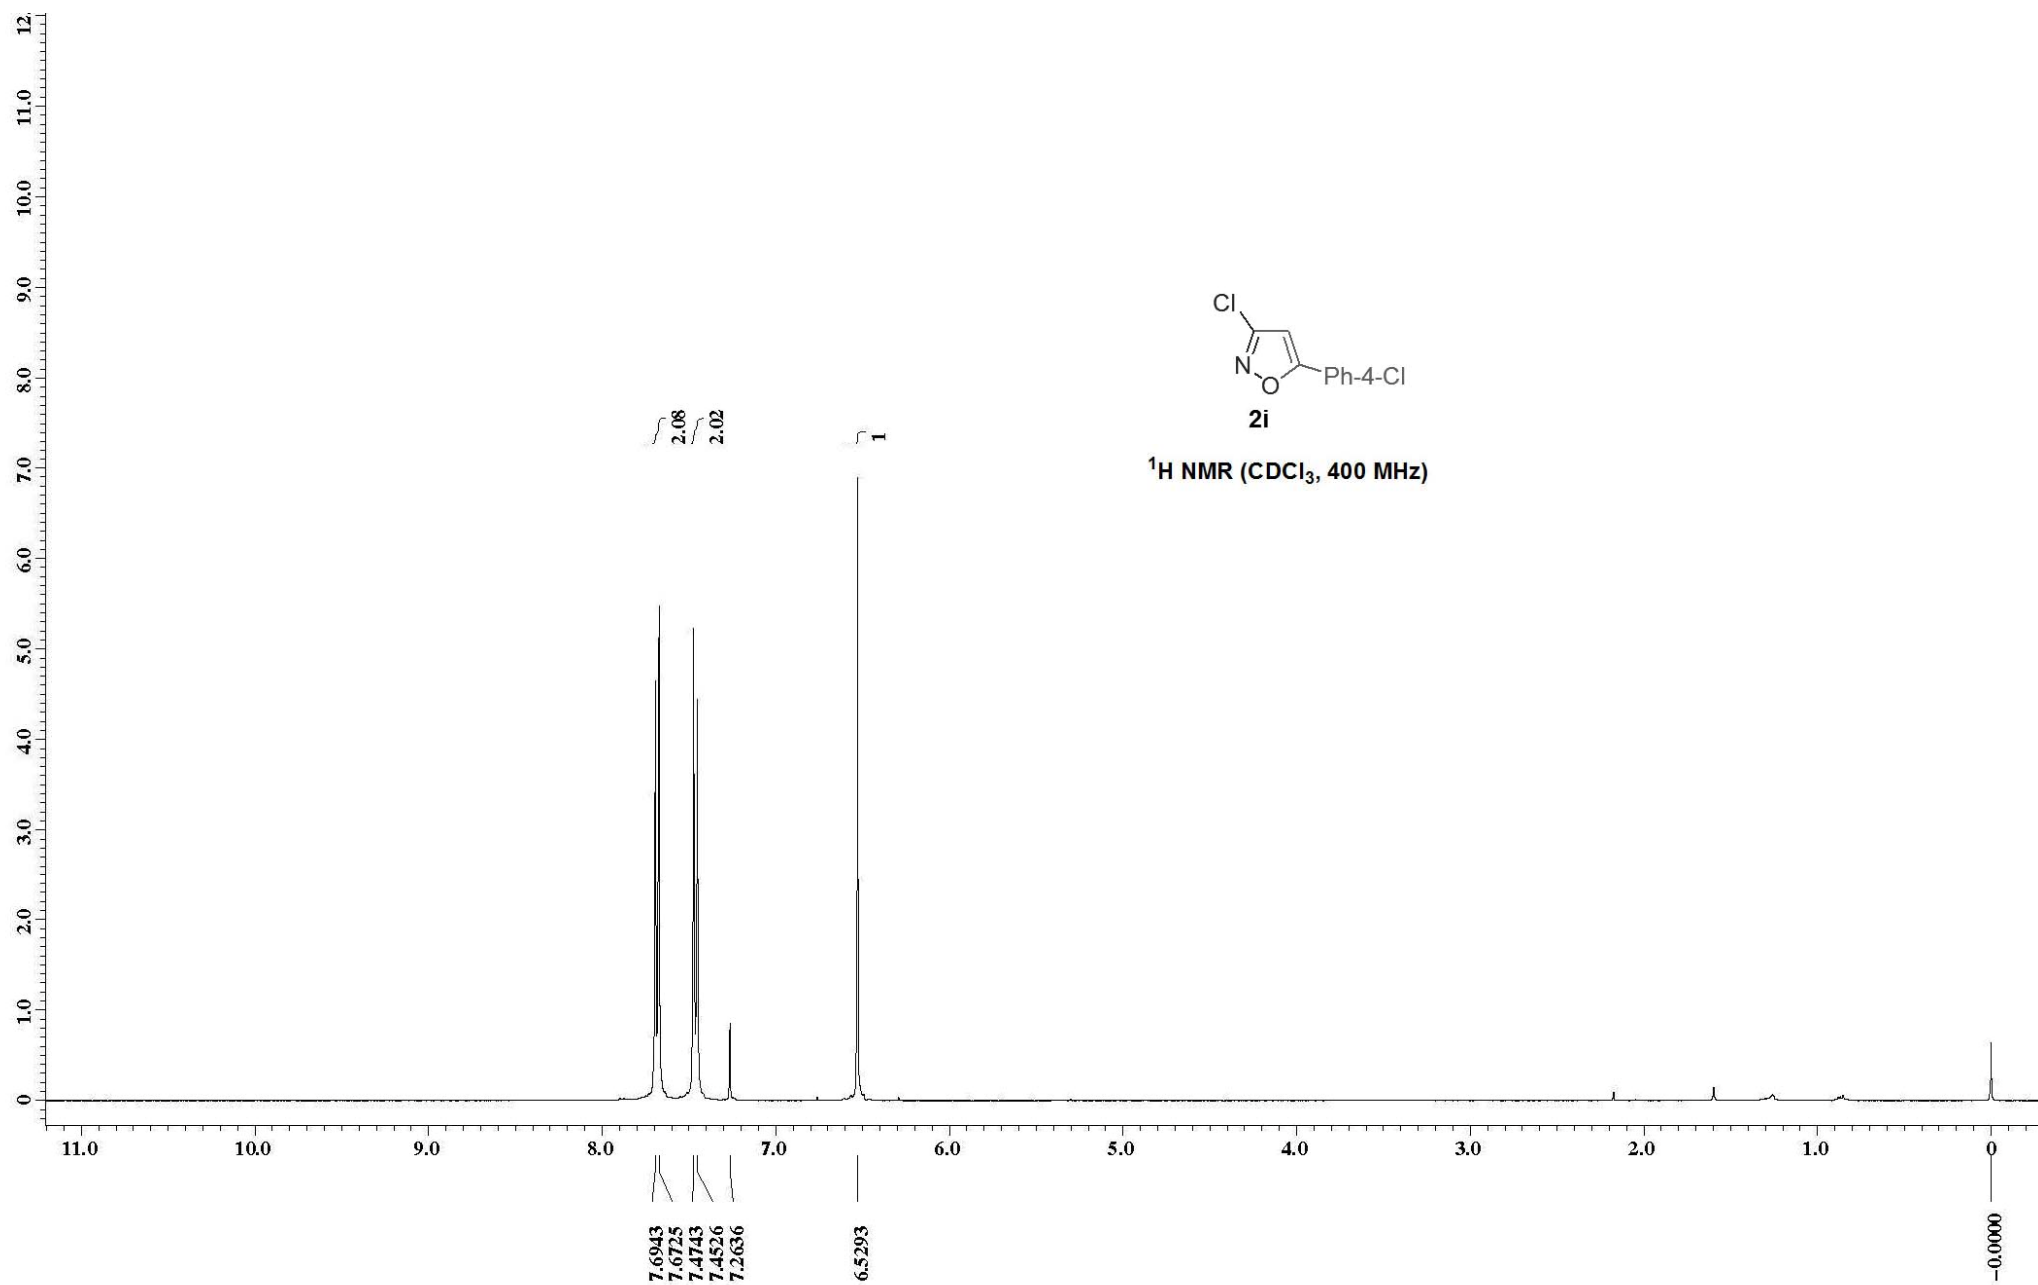

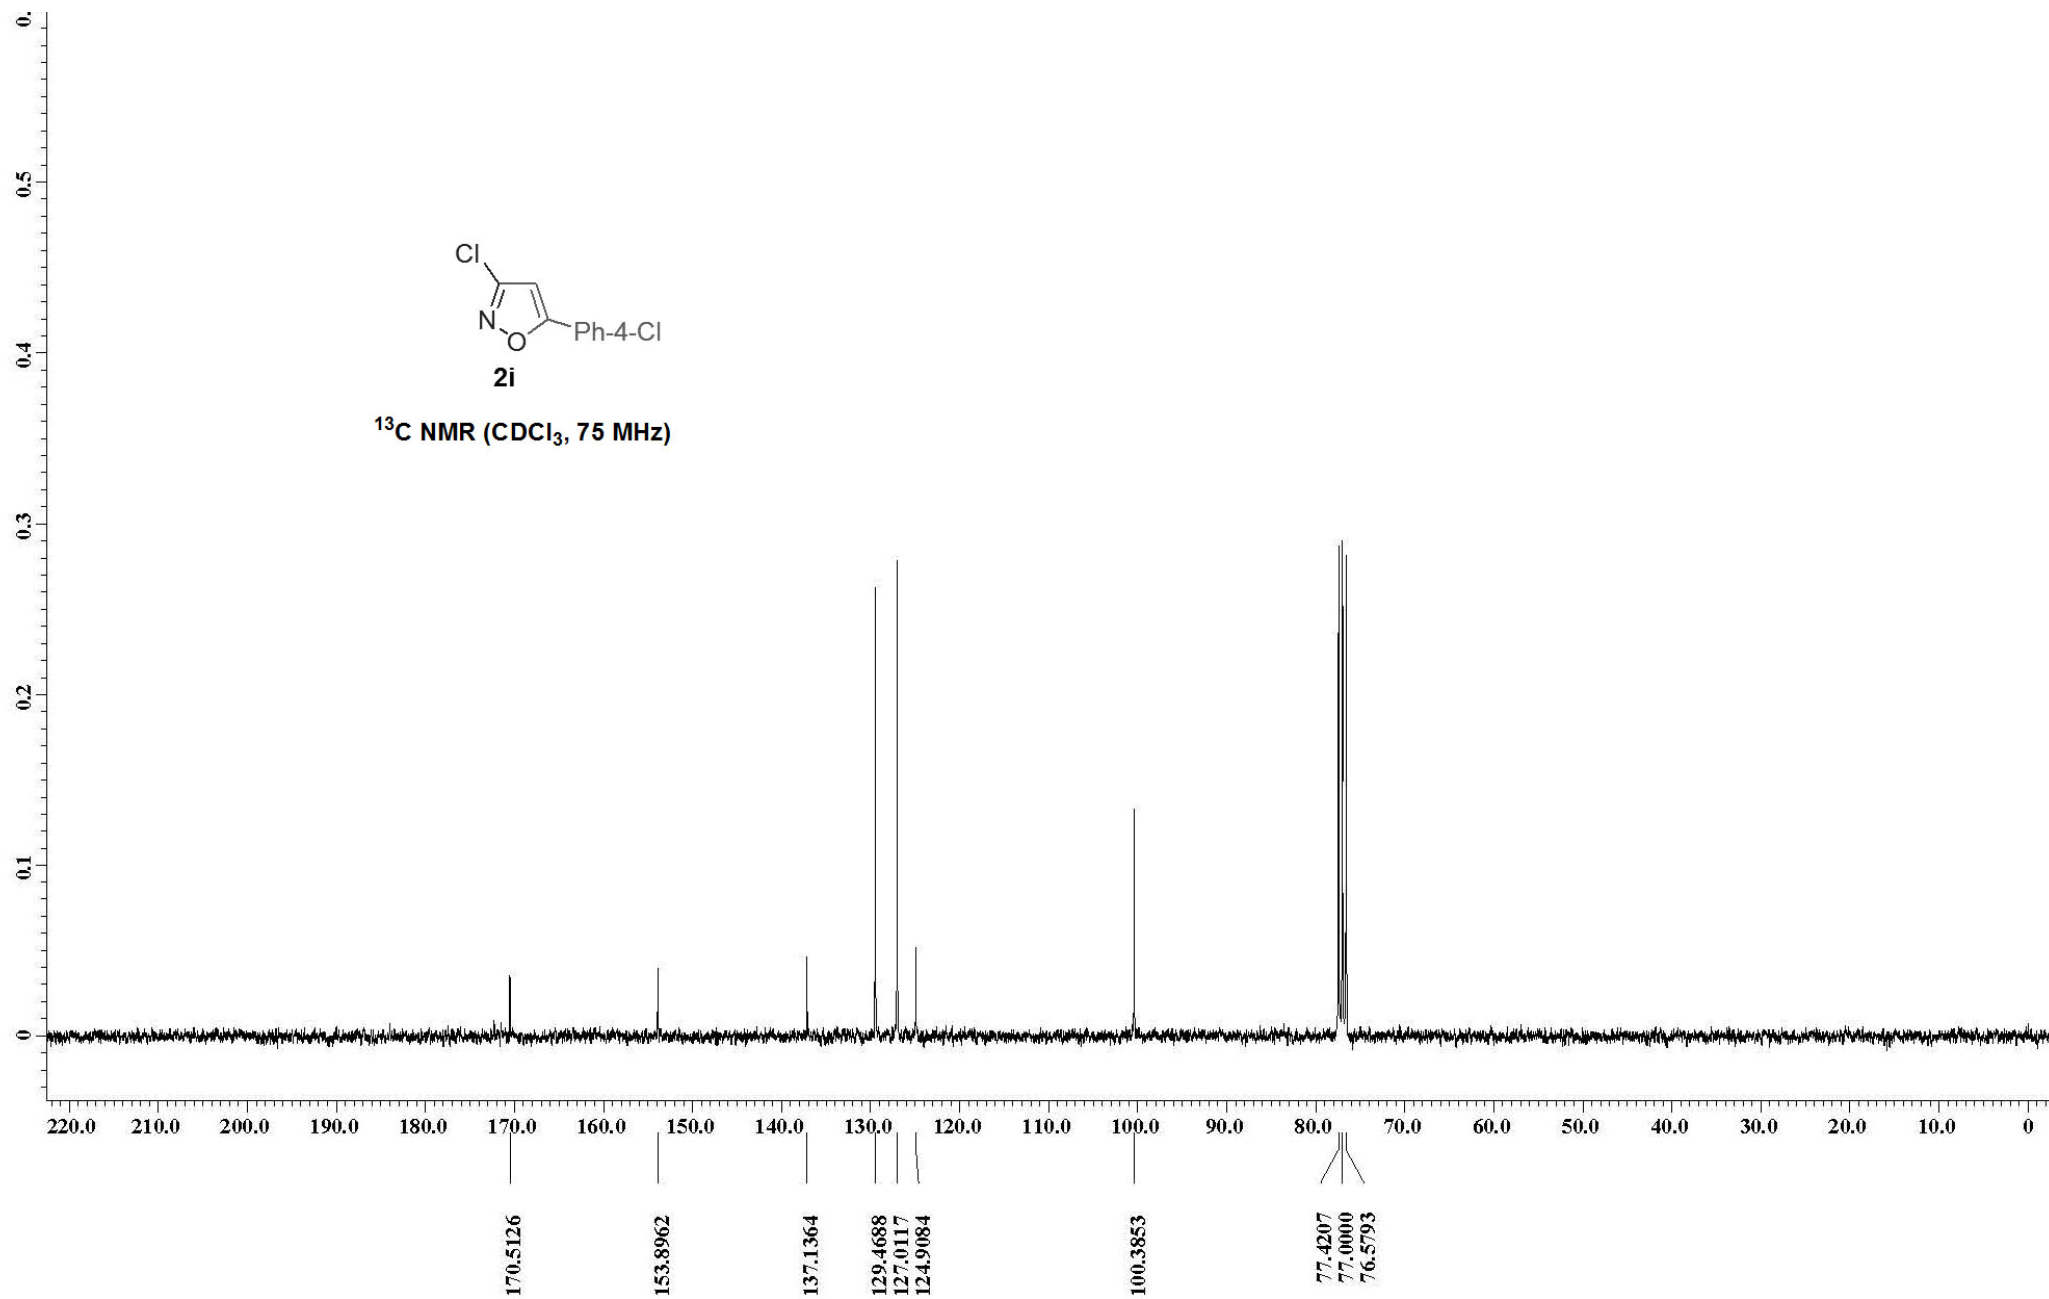

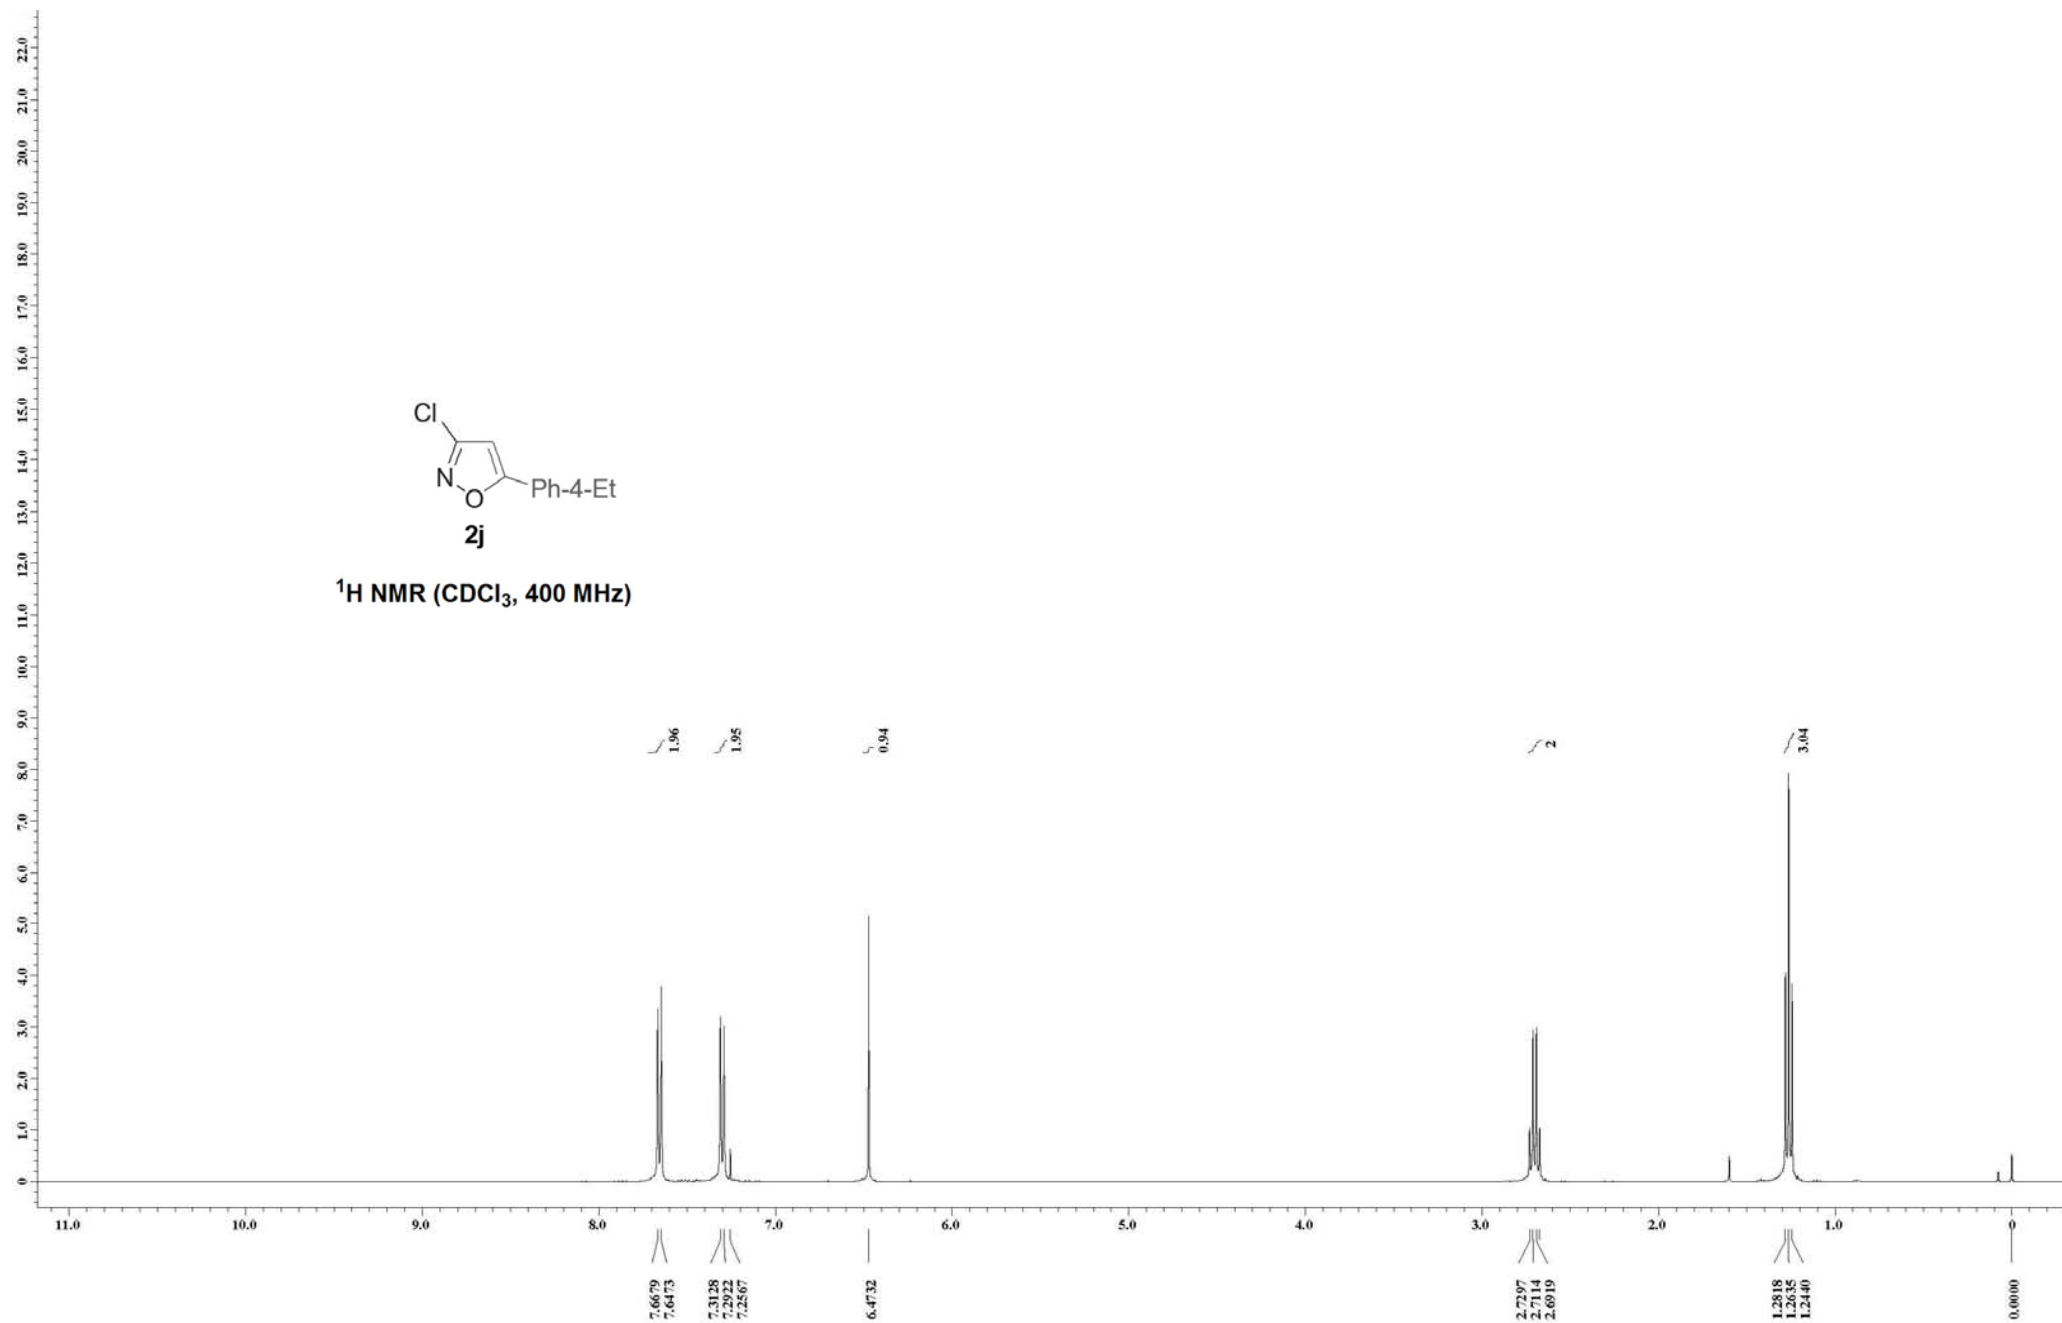

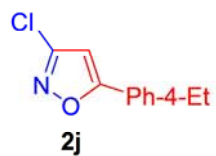

$^{13}\text{C}$  NMR ( $\text{CDCl}_3$ , 75 MHz)

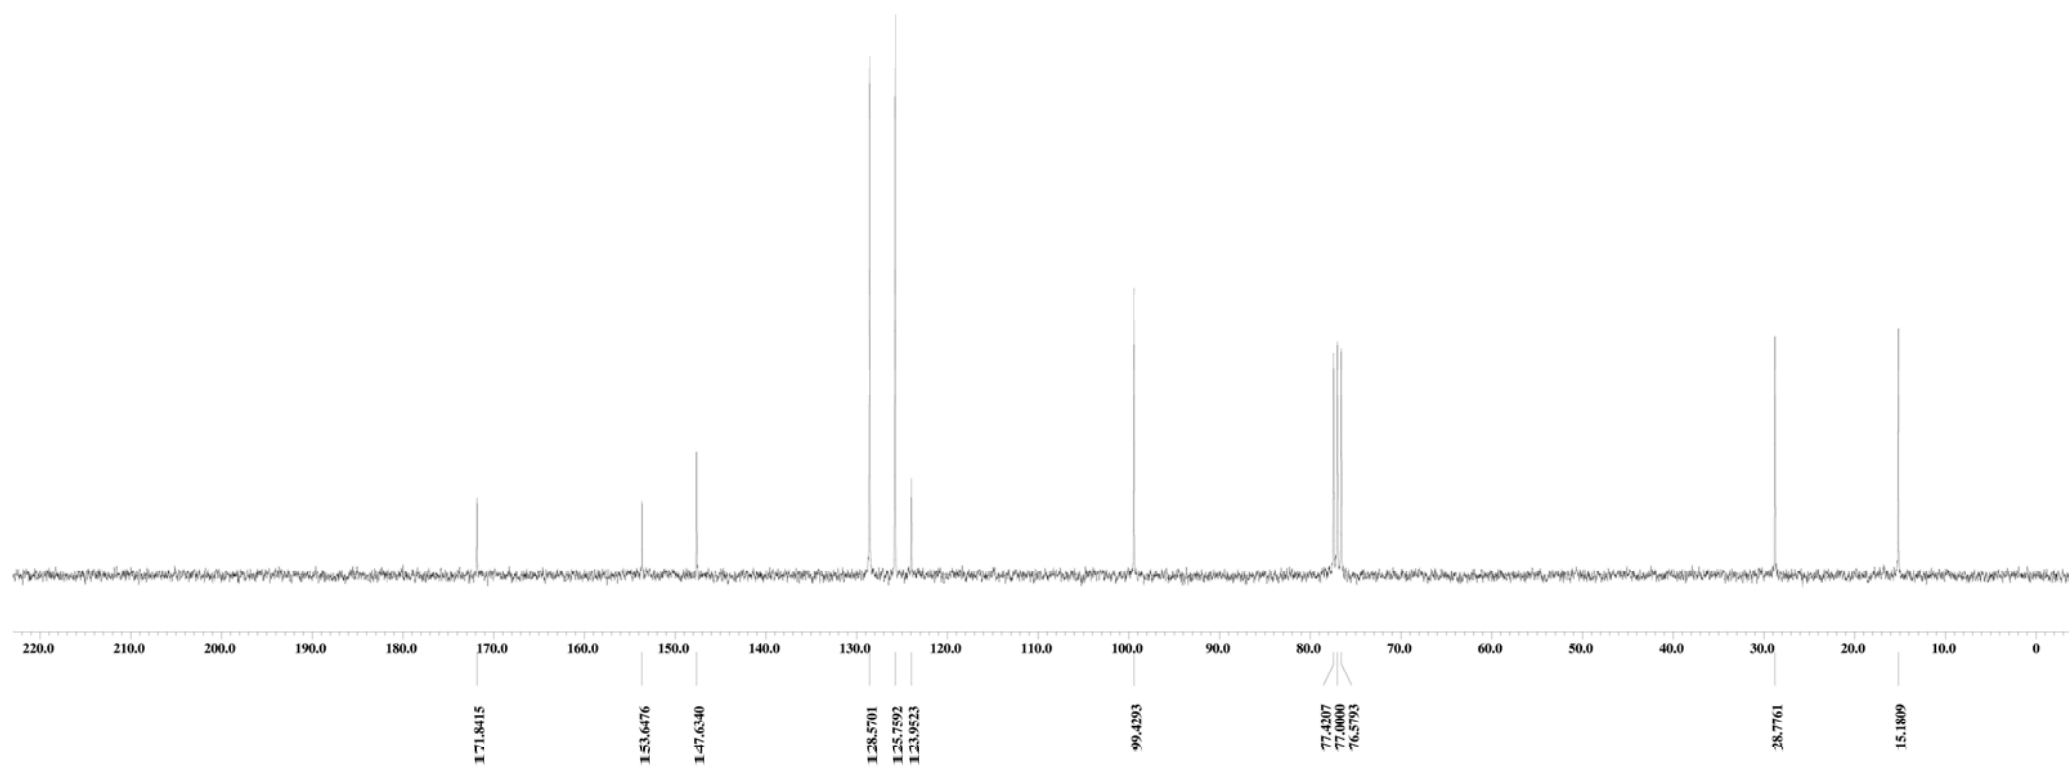

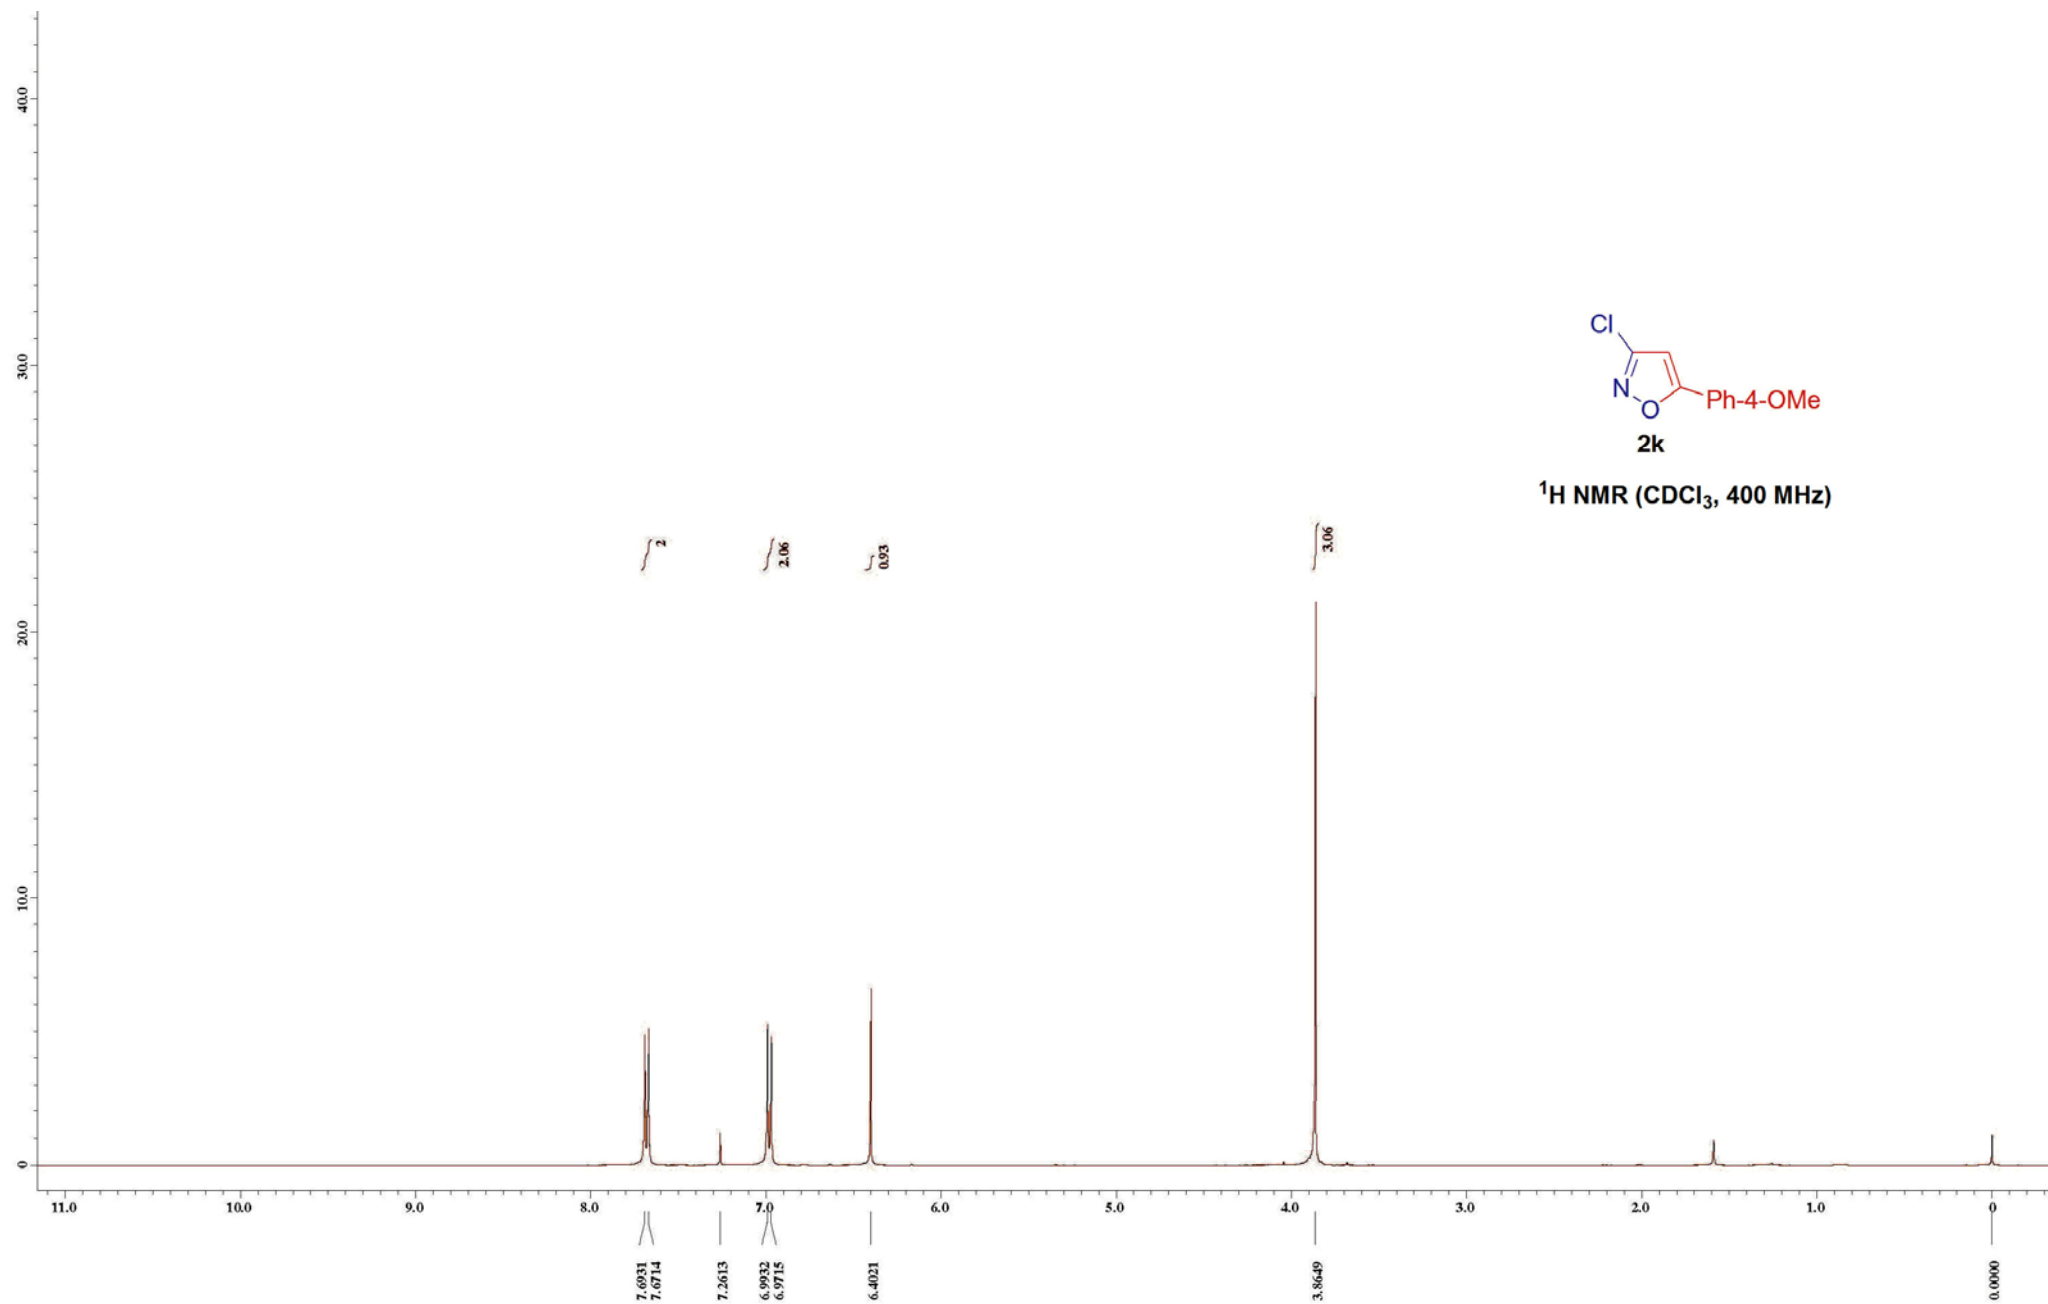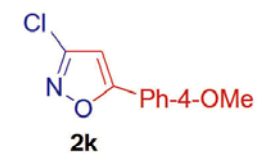

<sup>1</sup>H NMR (CDCl<sub>3</sub>, 400 MHz)



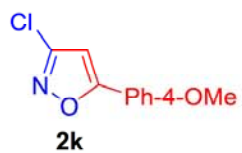

$^{13}\text{C}$  NMR ( $\text{CDCl}_3$ , 75 MHz)

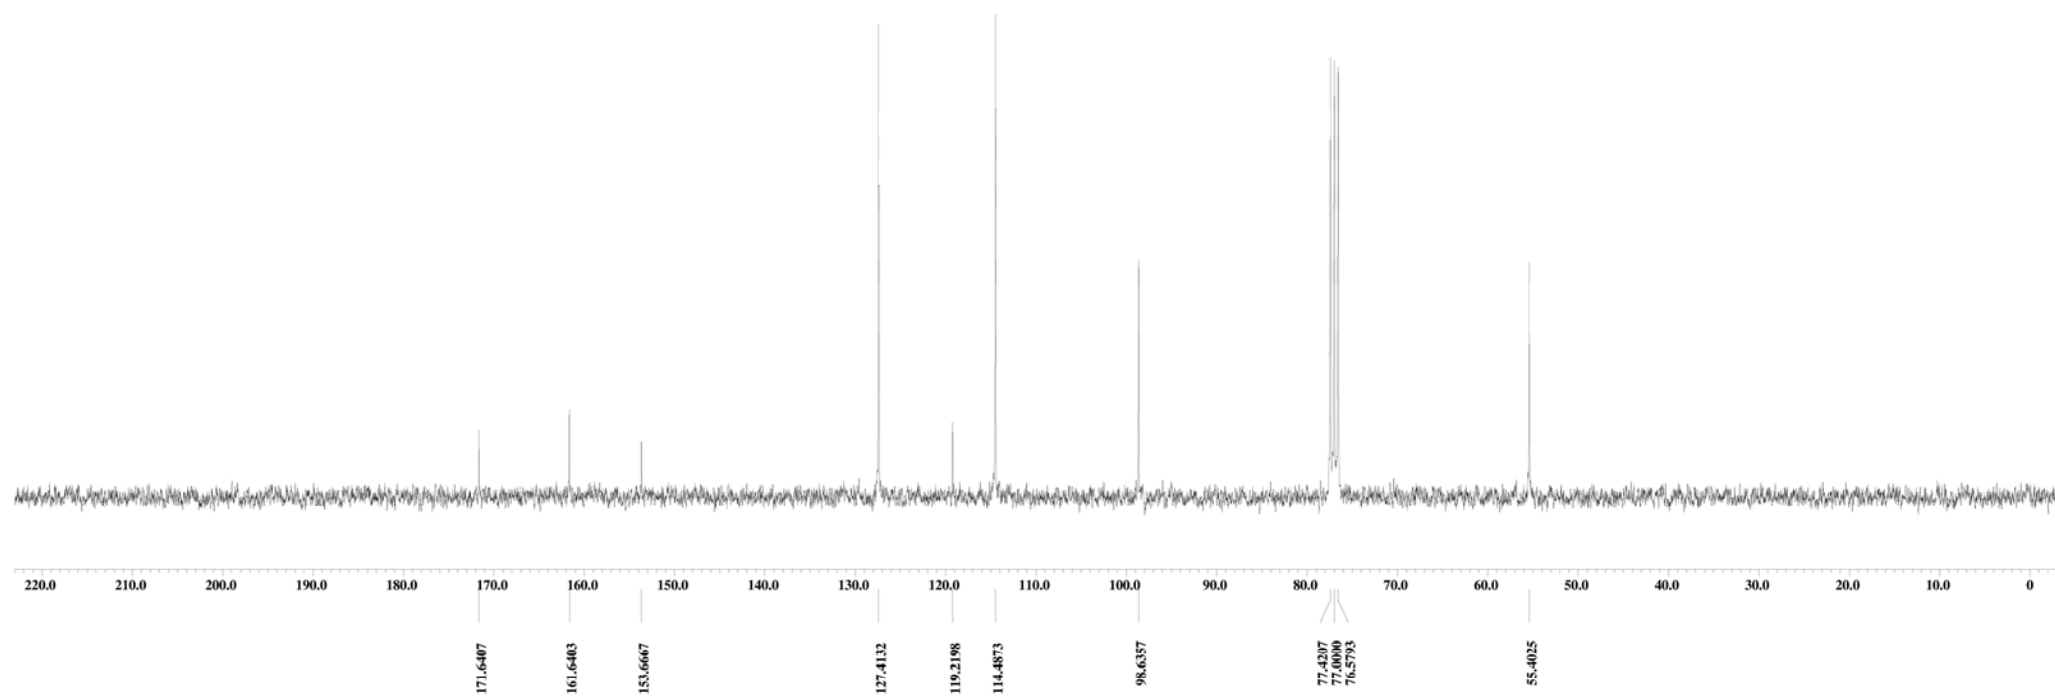

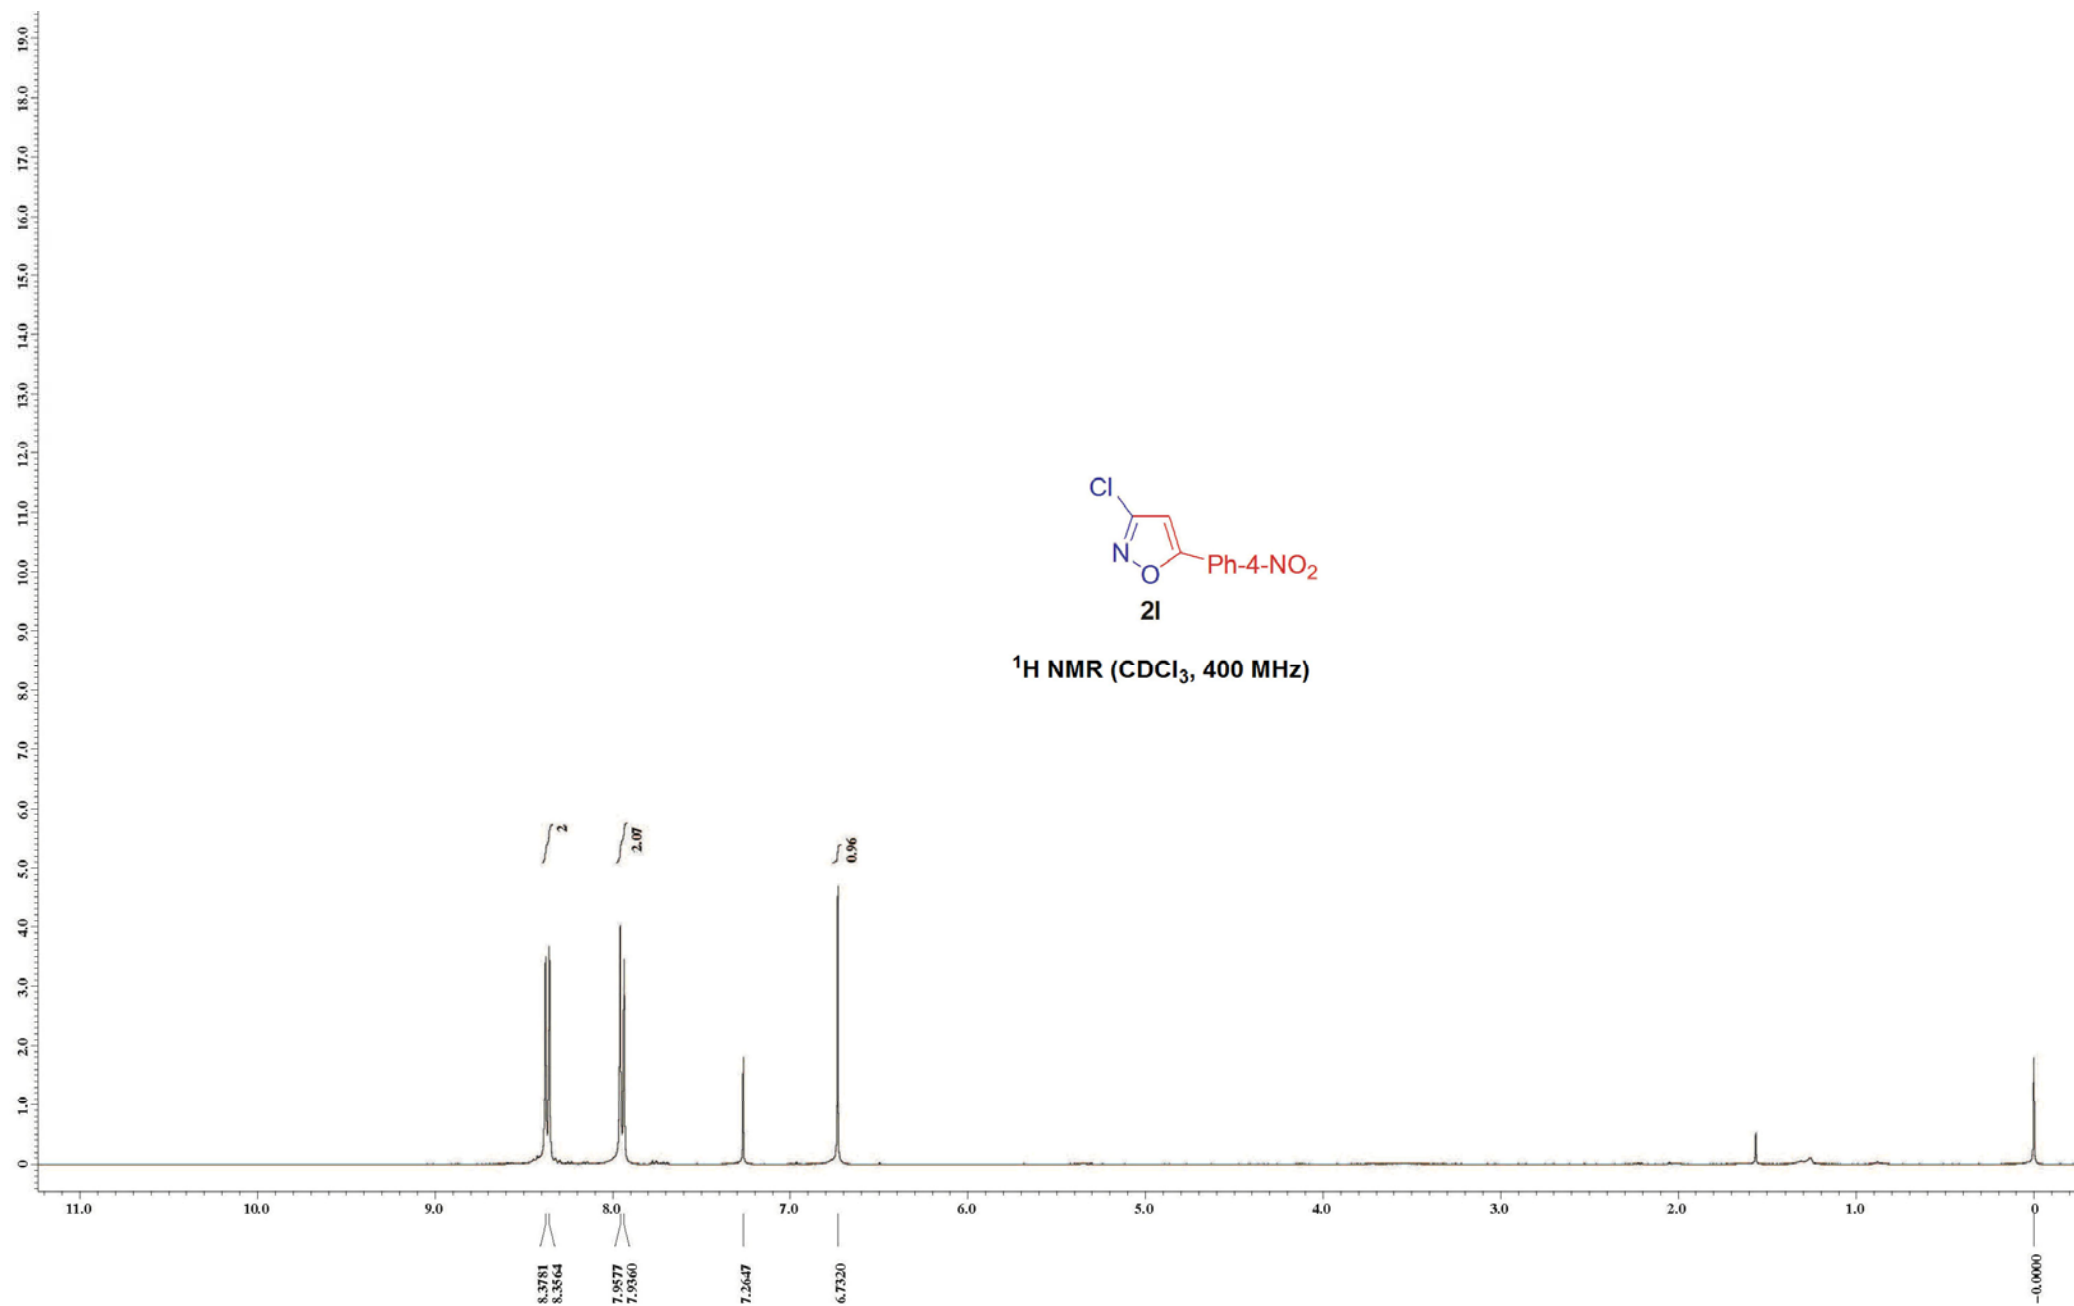

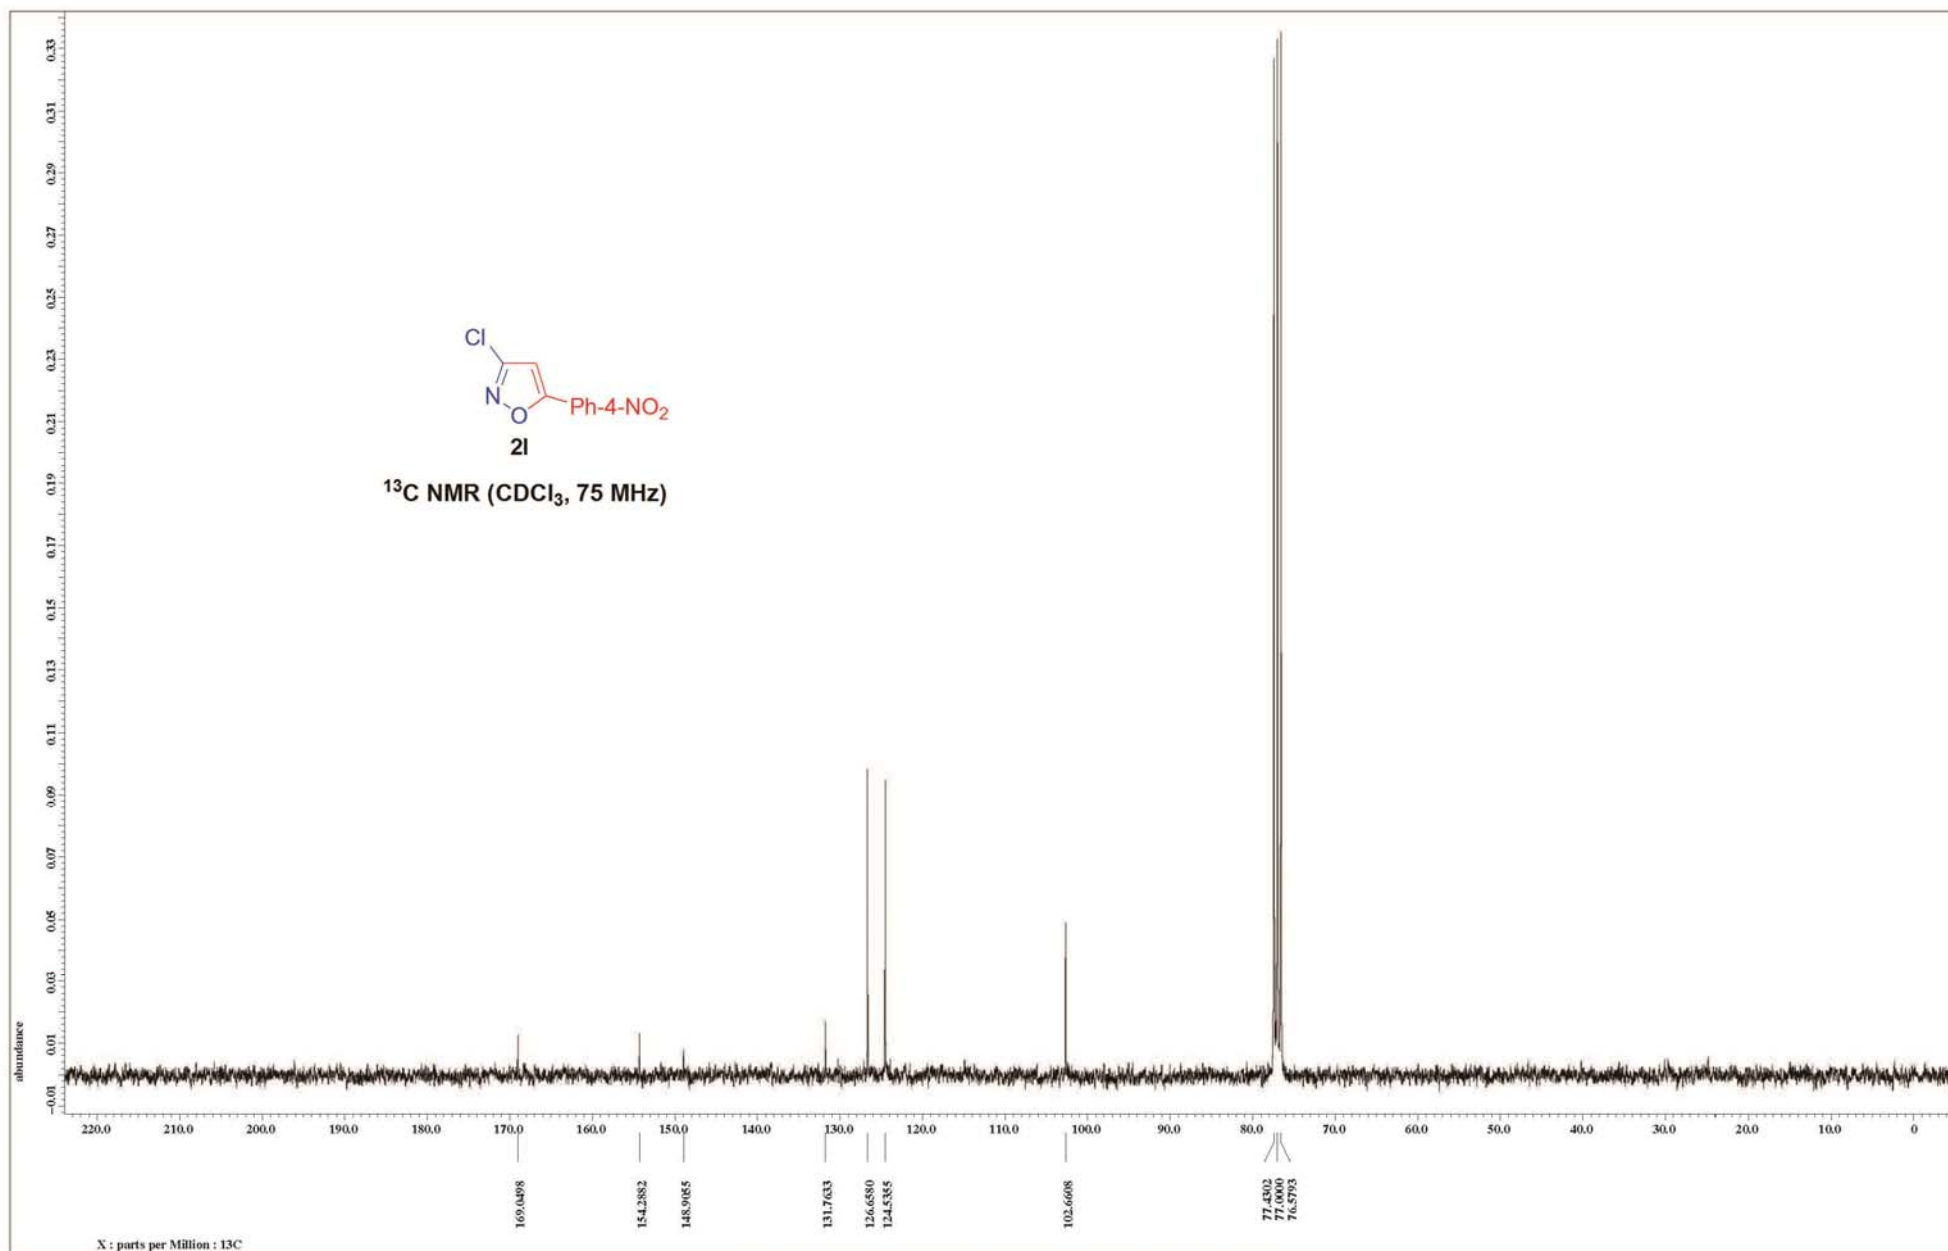

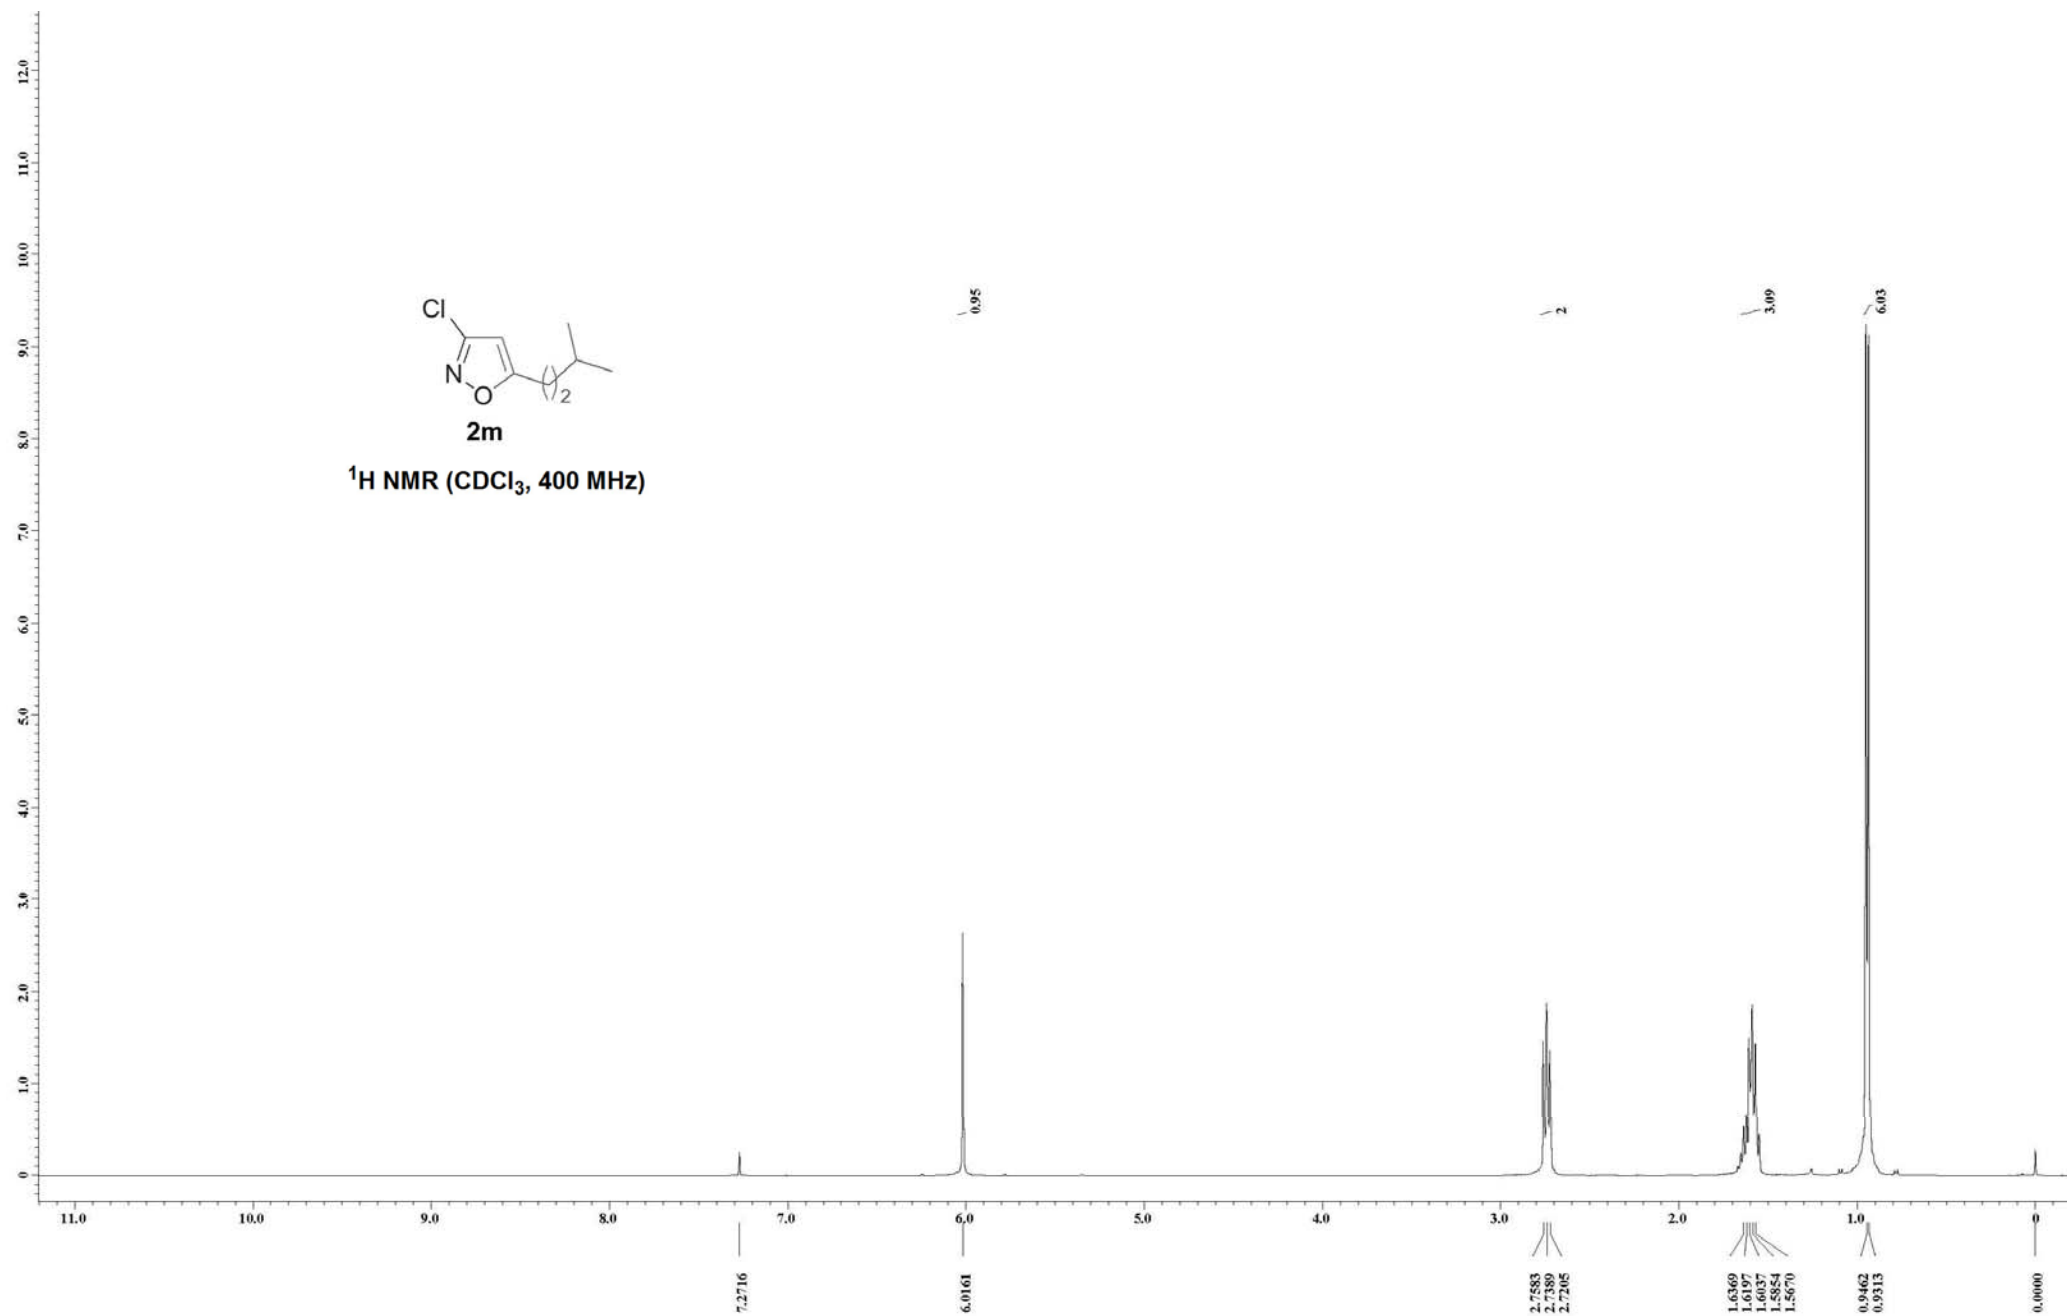

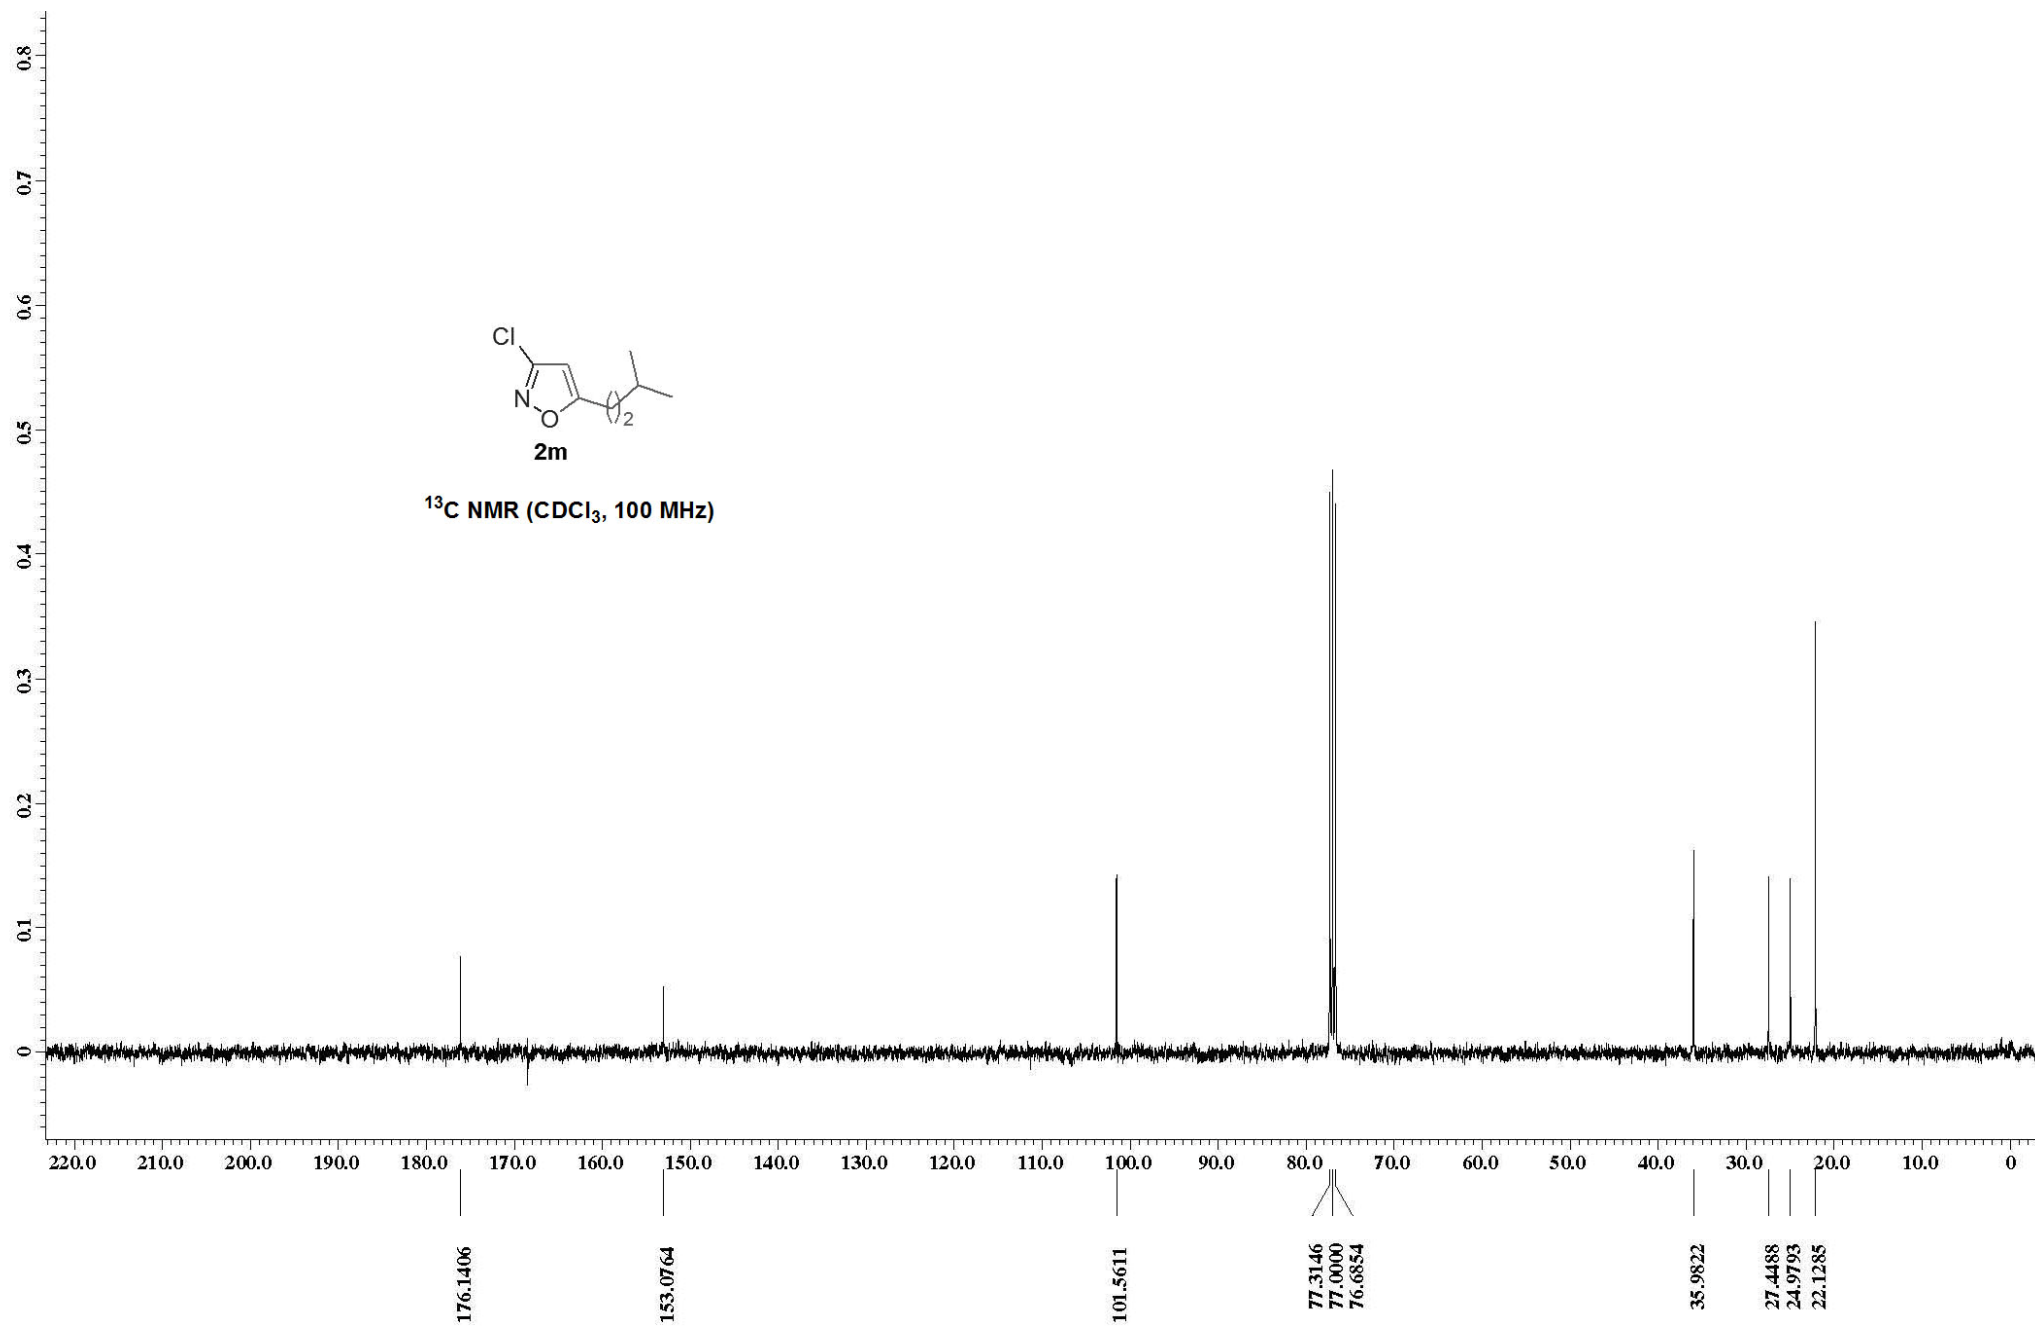

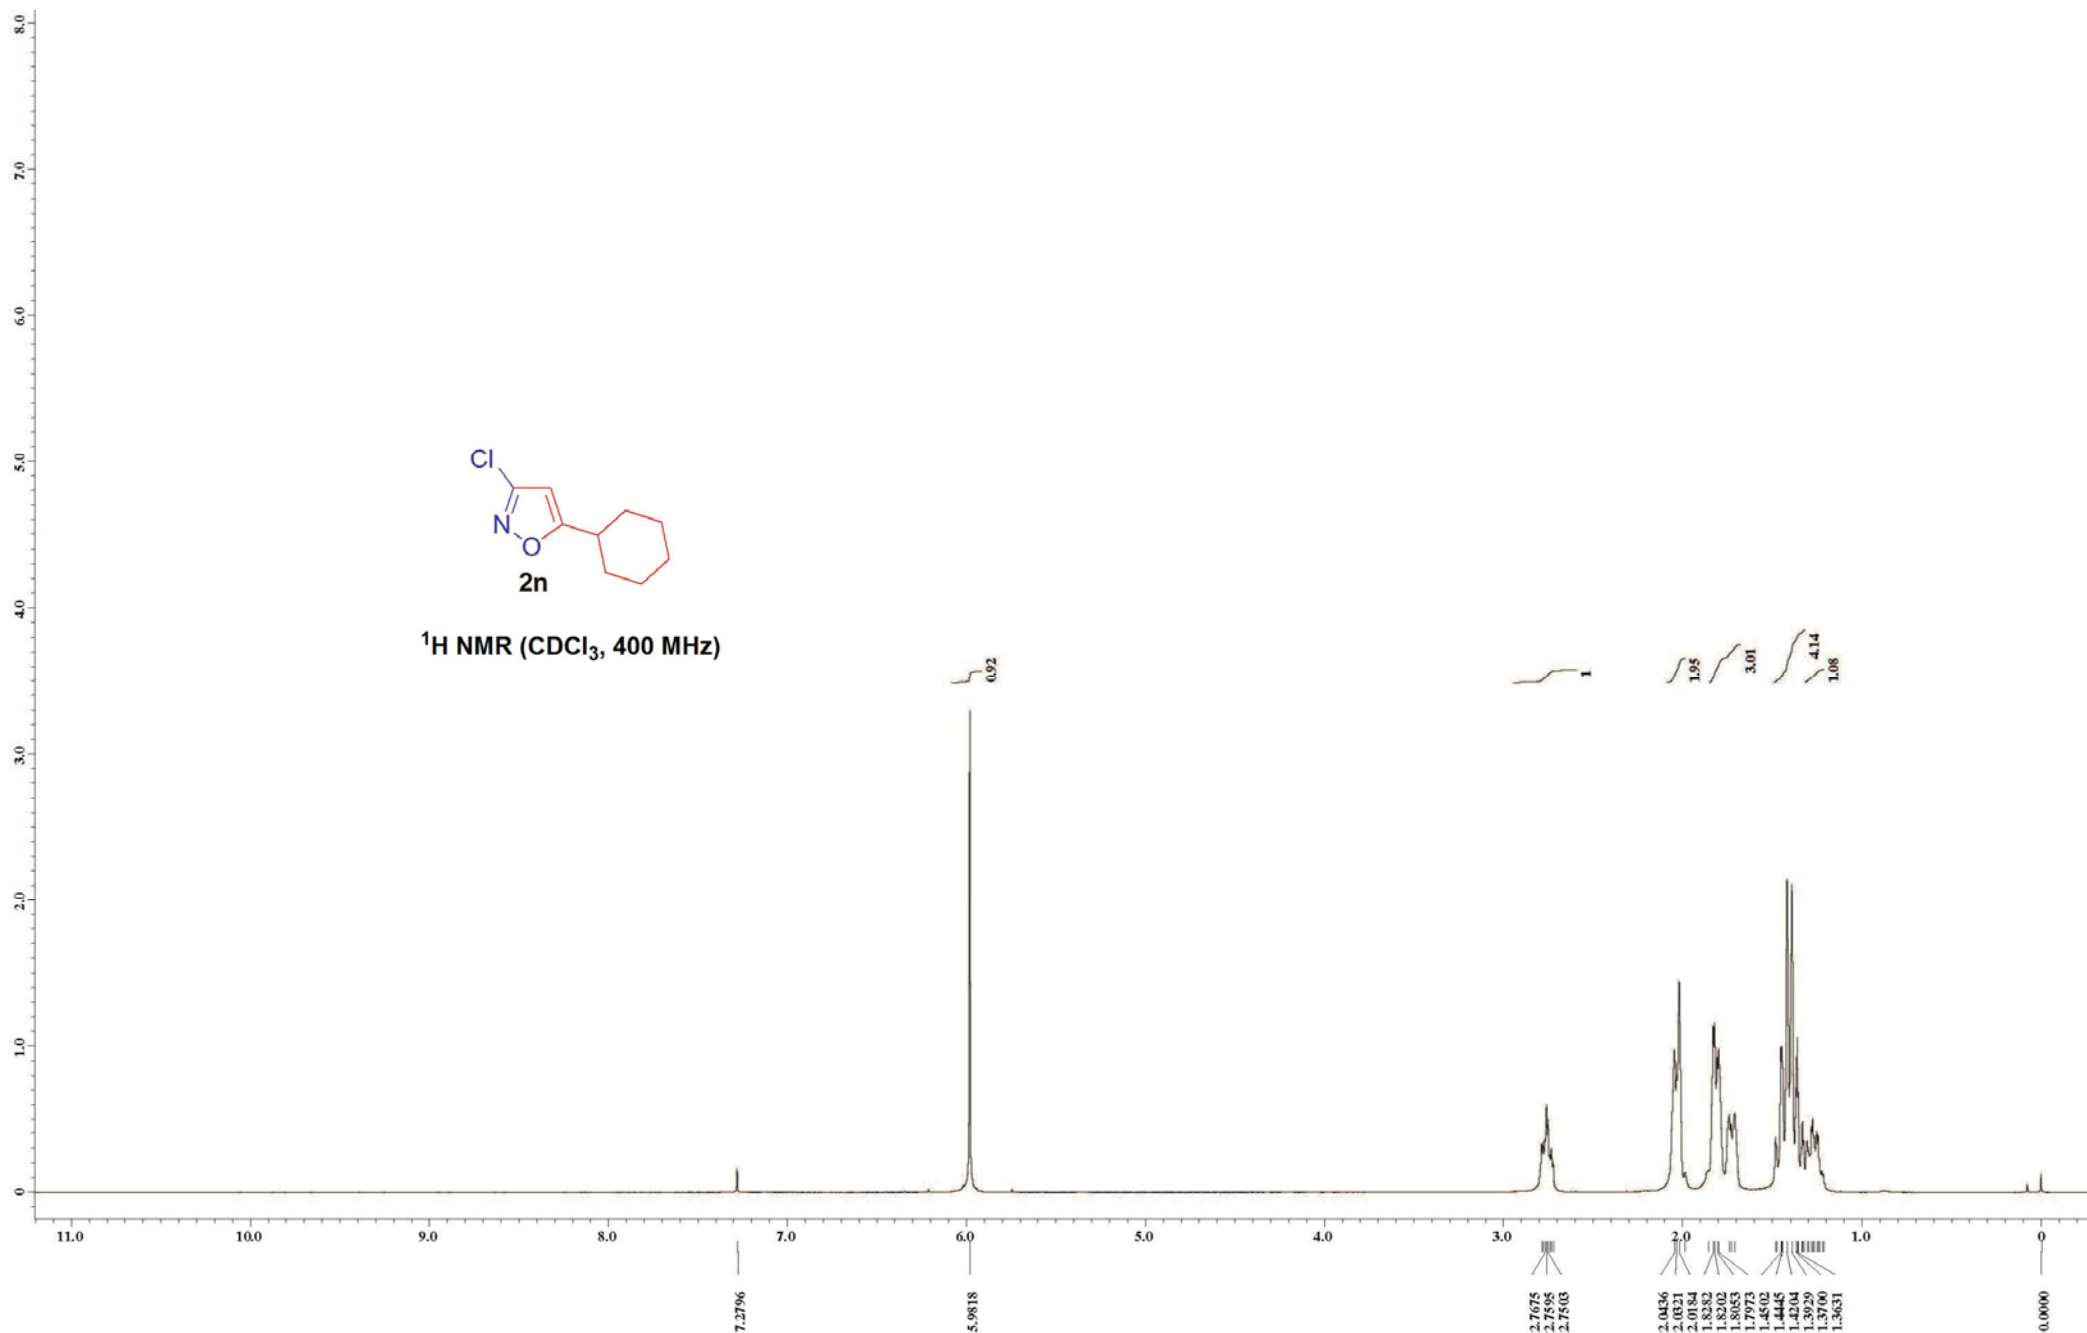

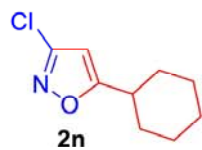

$^{13}\text{C}$  NMR ( $\text{CDCl}_3$ , 75 MHz)

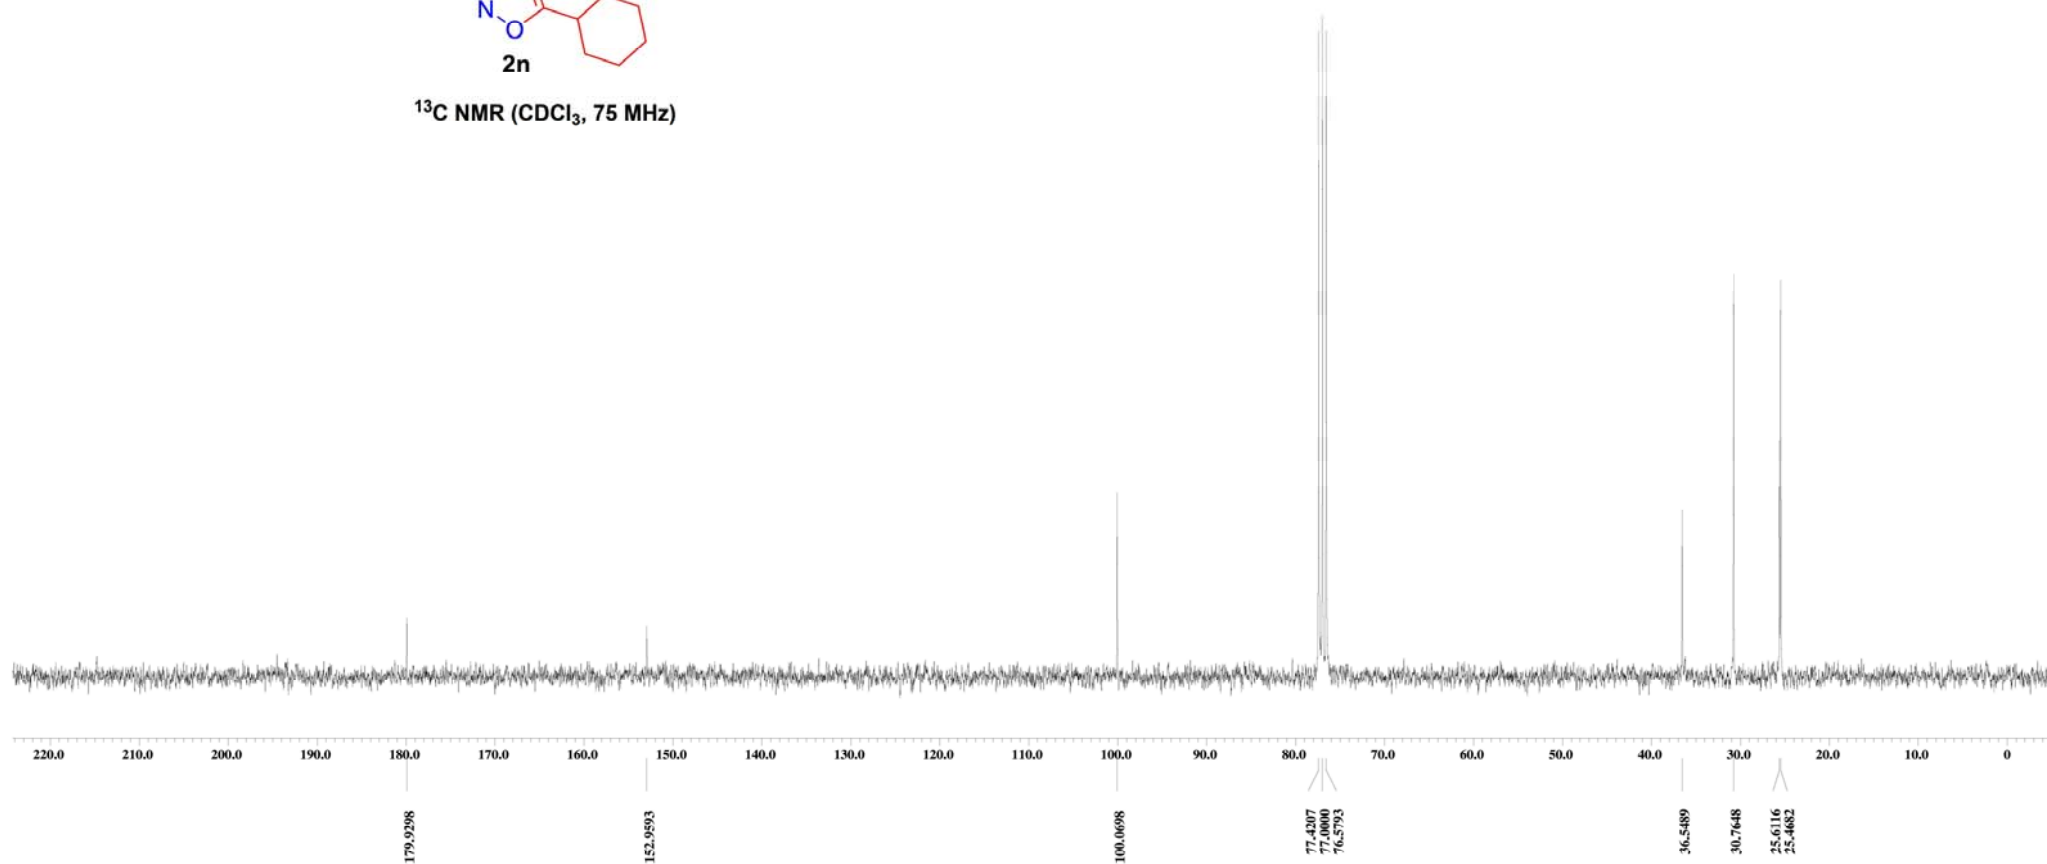

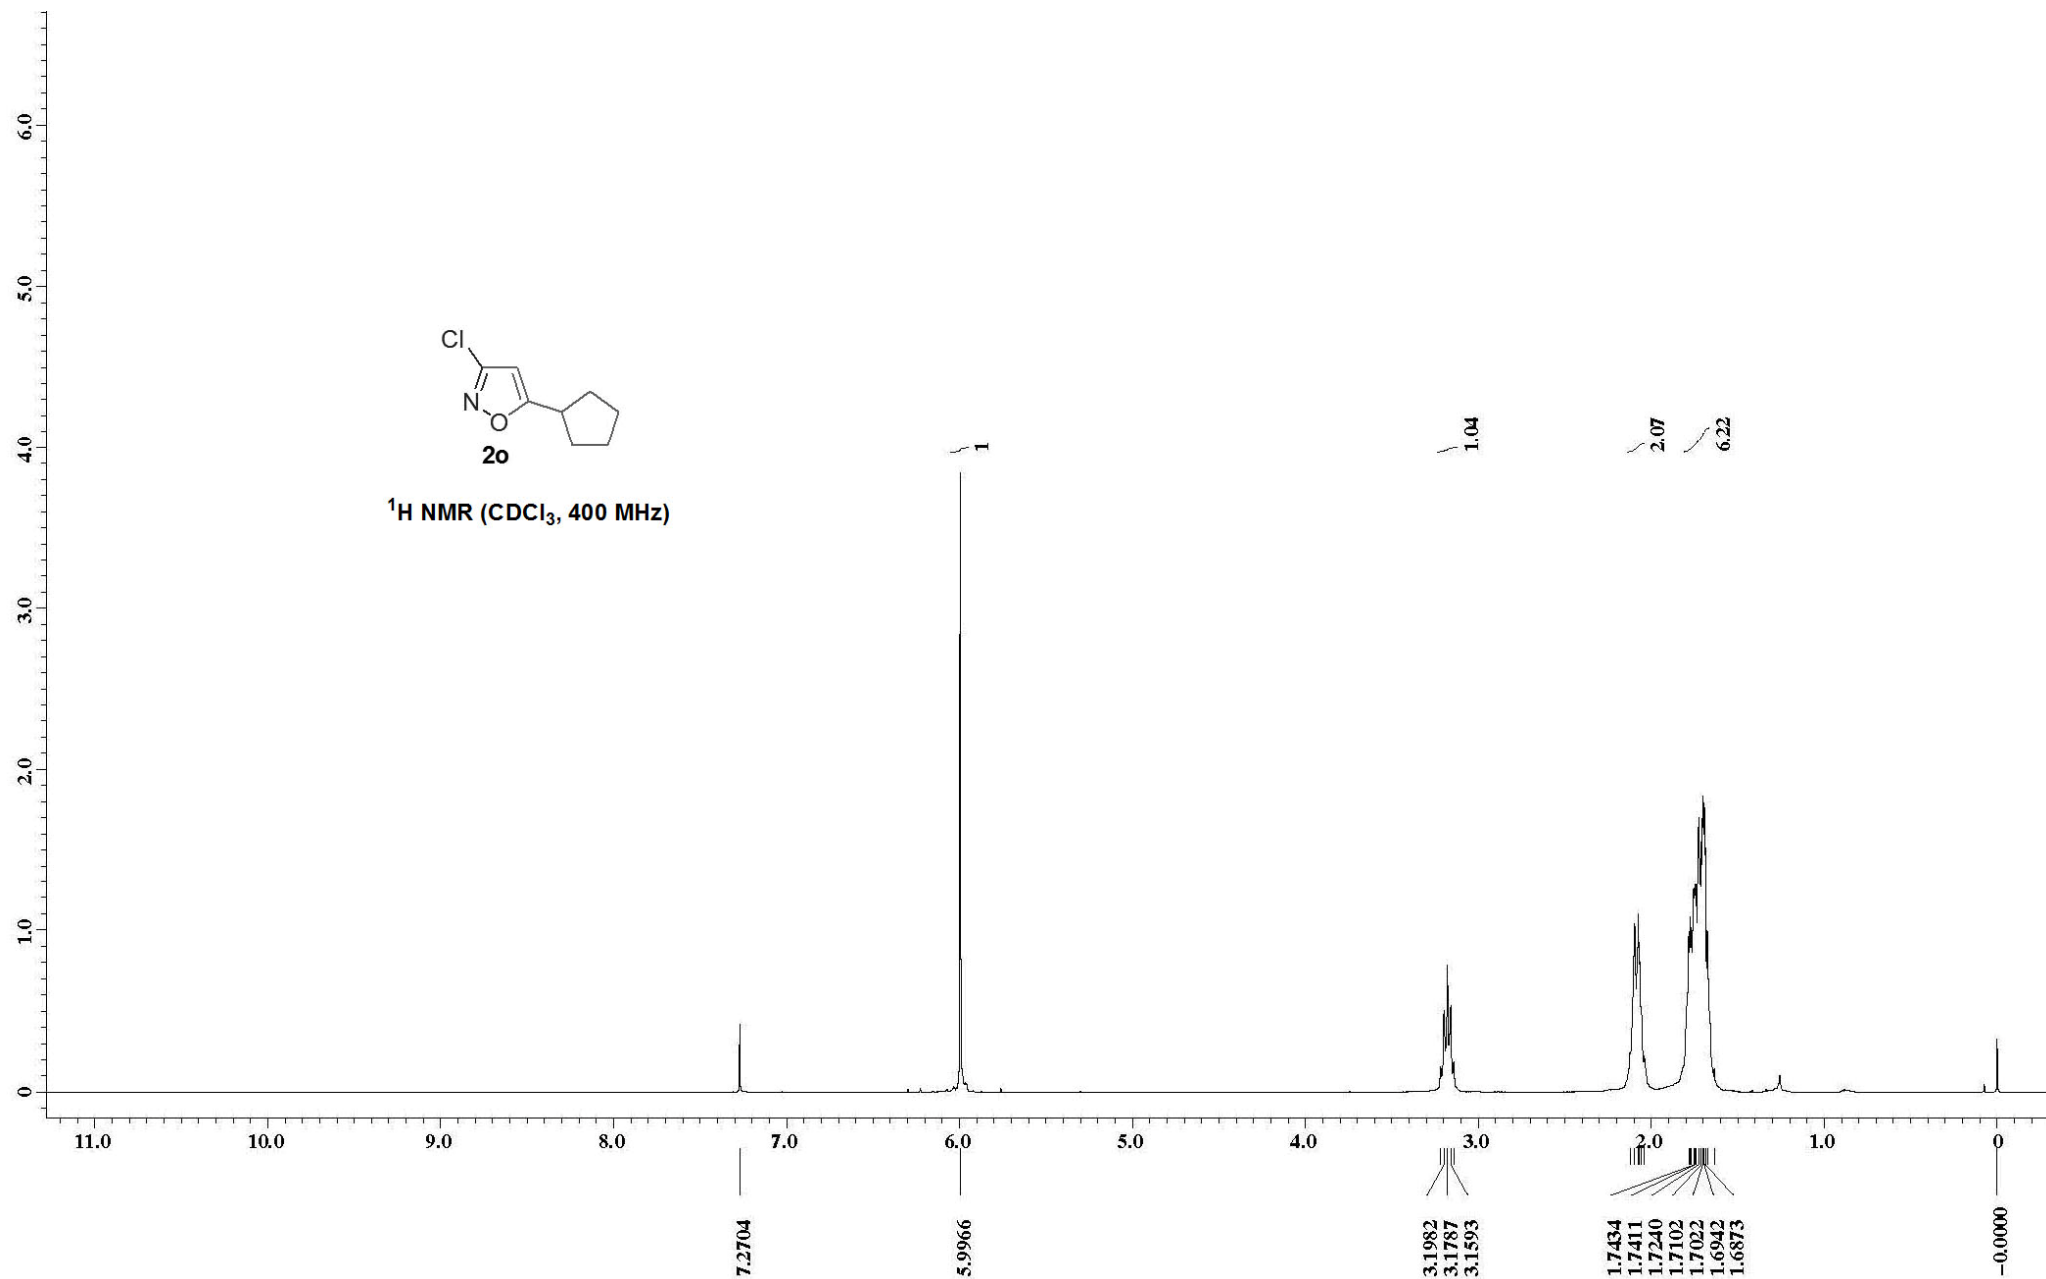



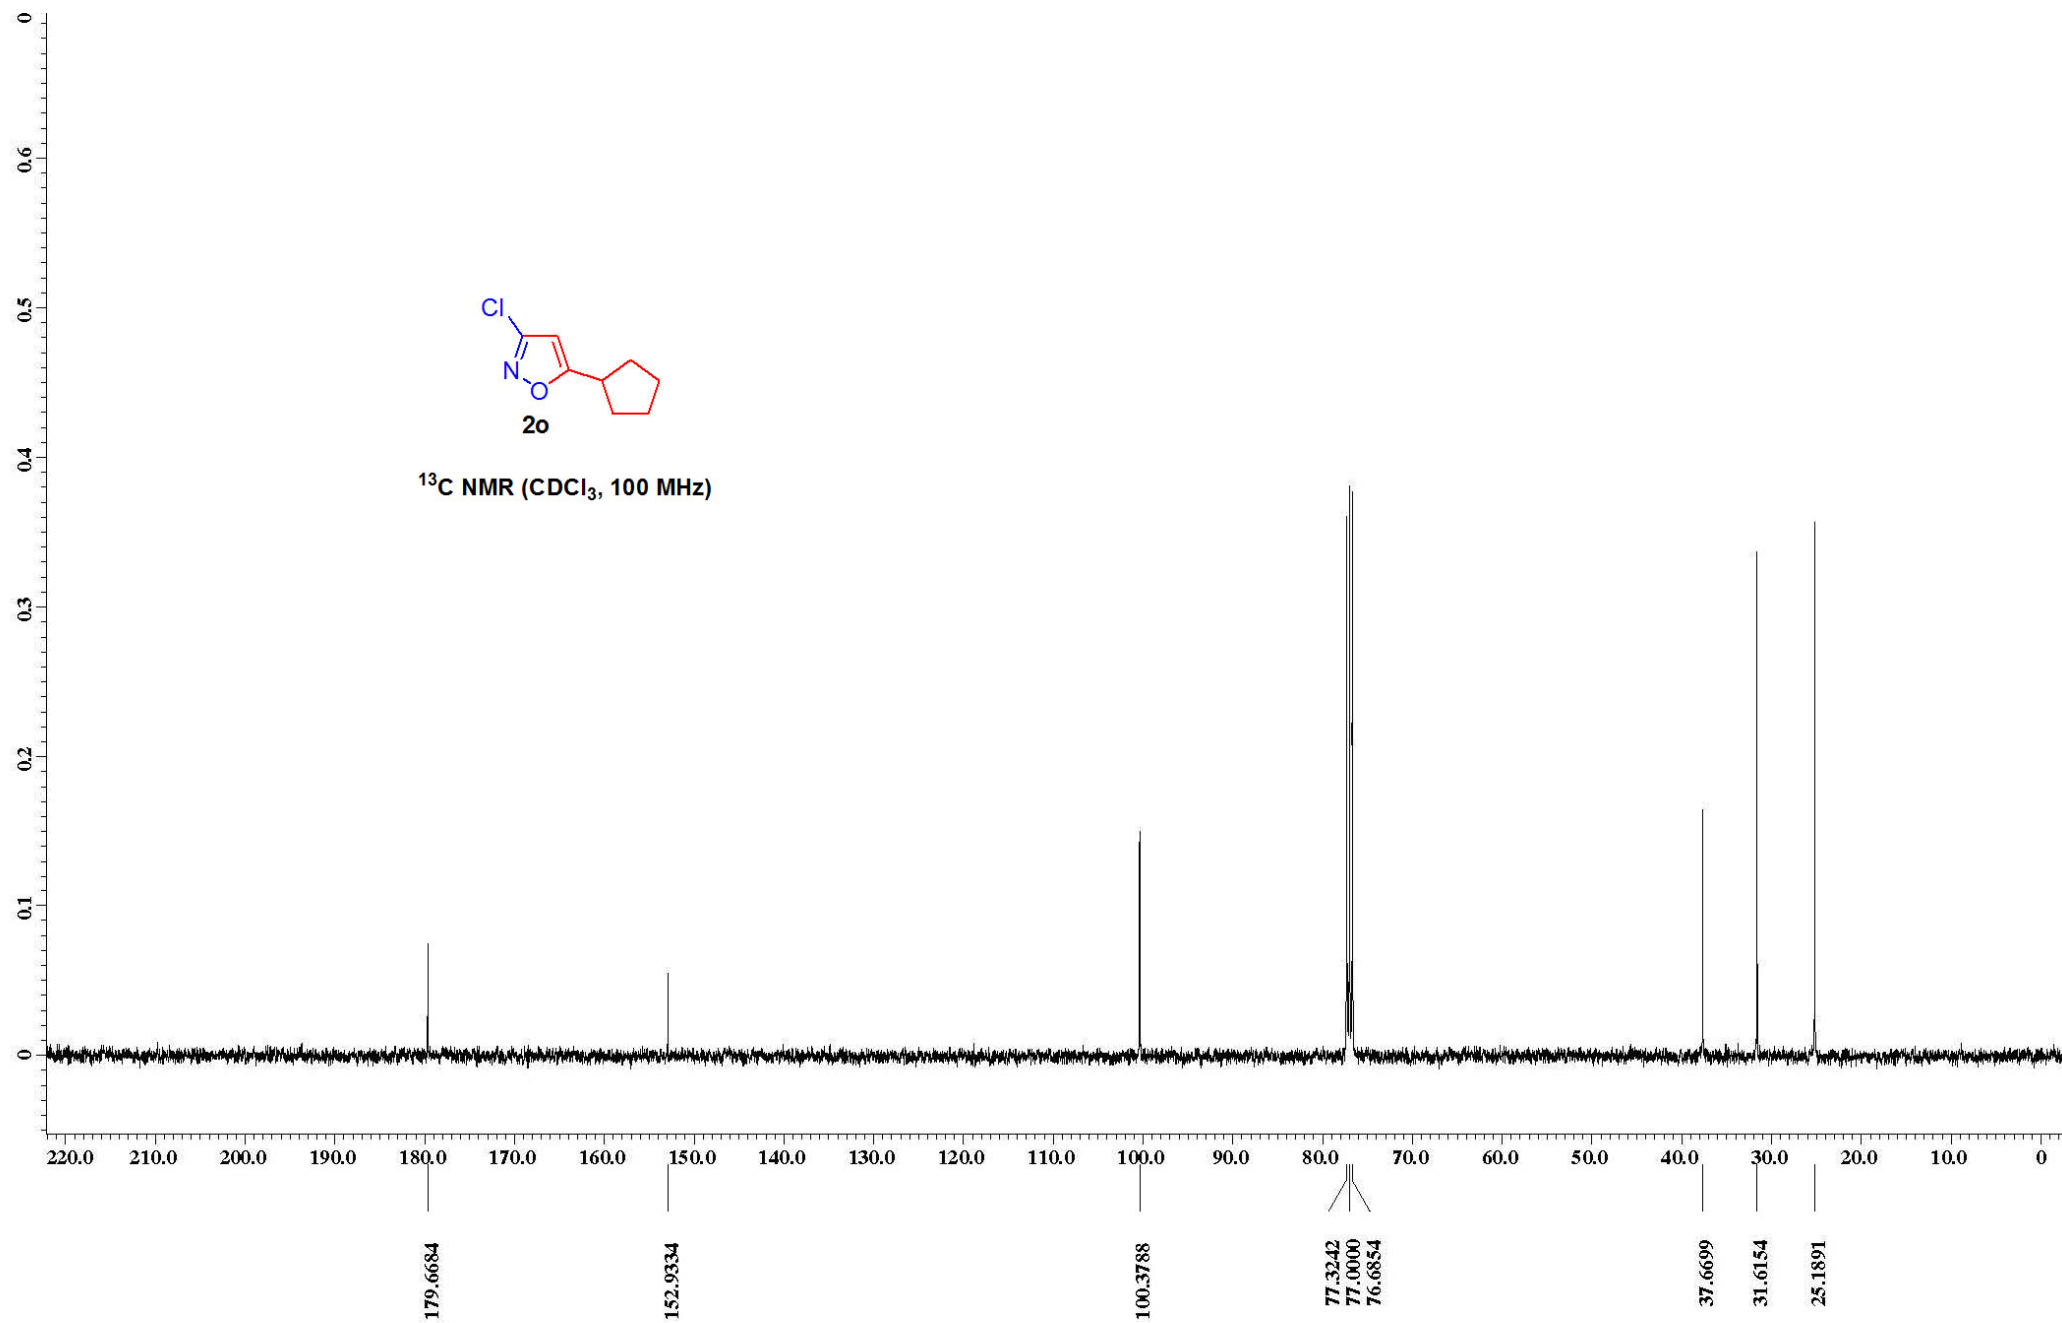

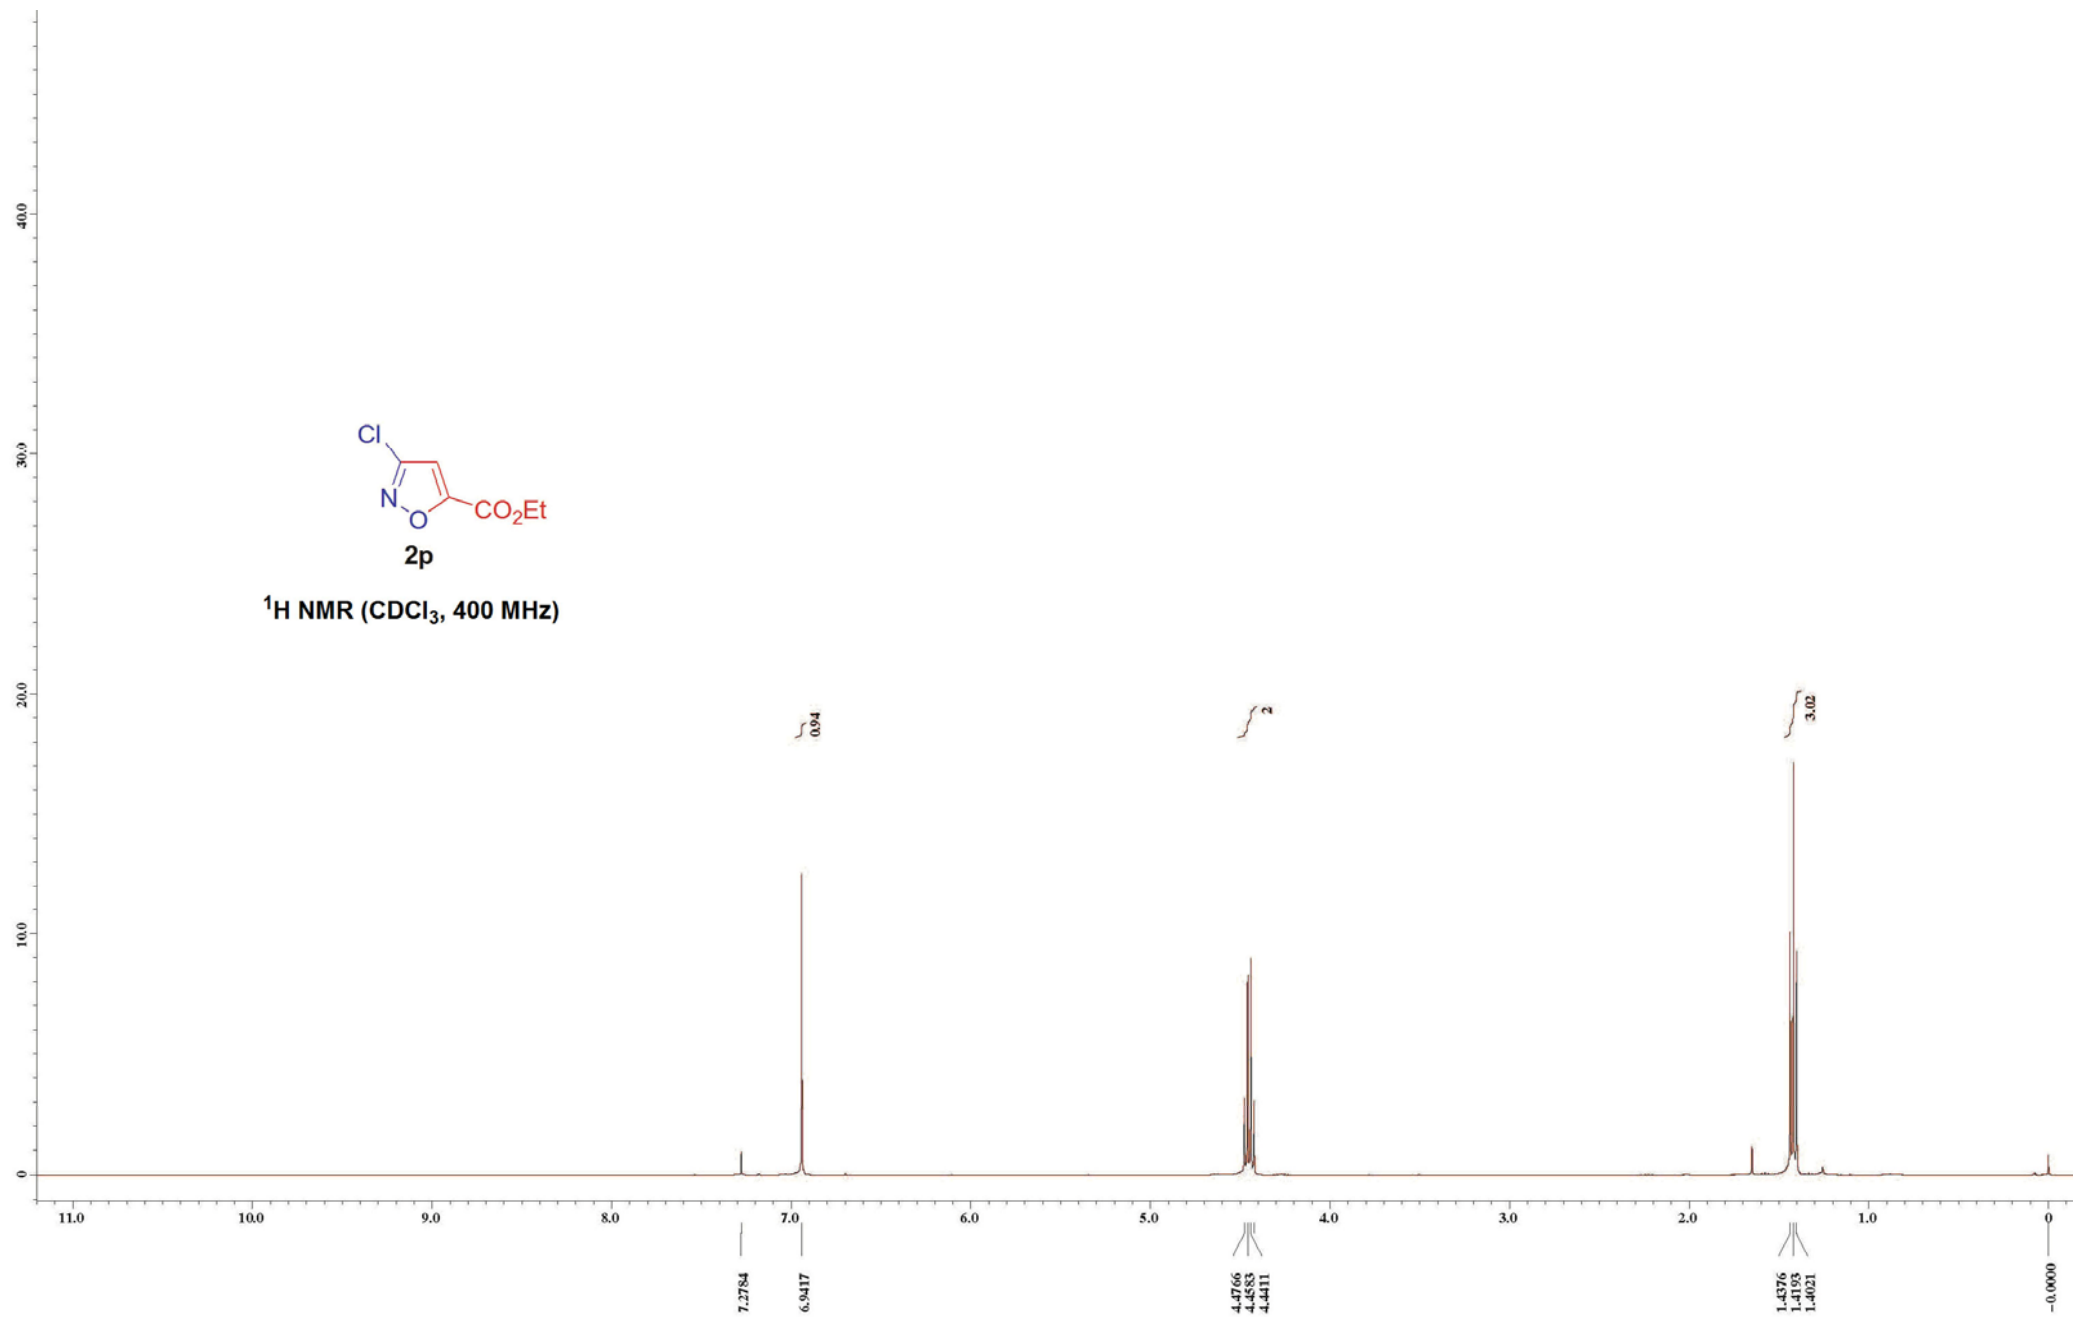

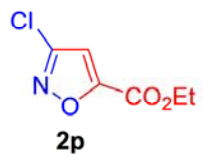

$^{13}\text{C}$  NMR ( $\text{CDCl}_3$ , 75 MHz)

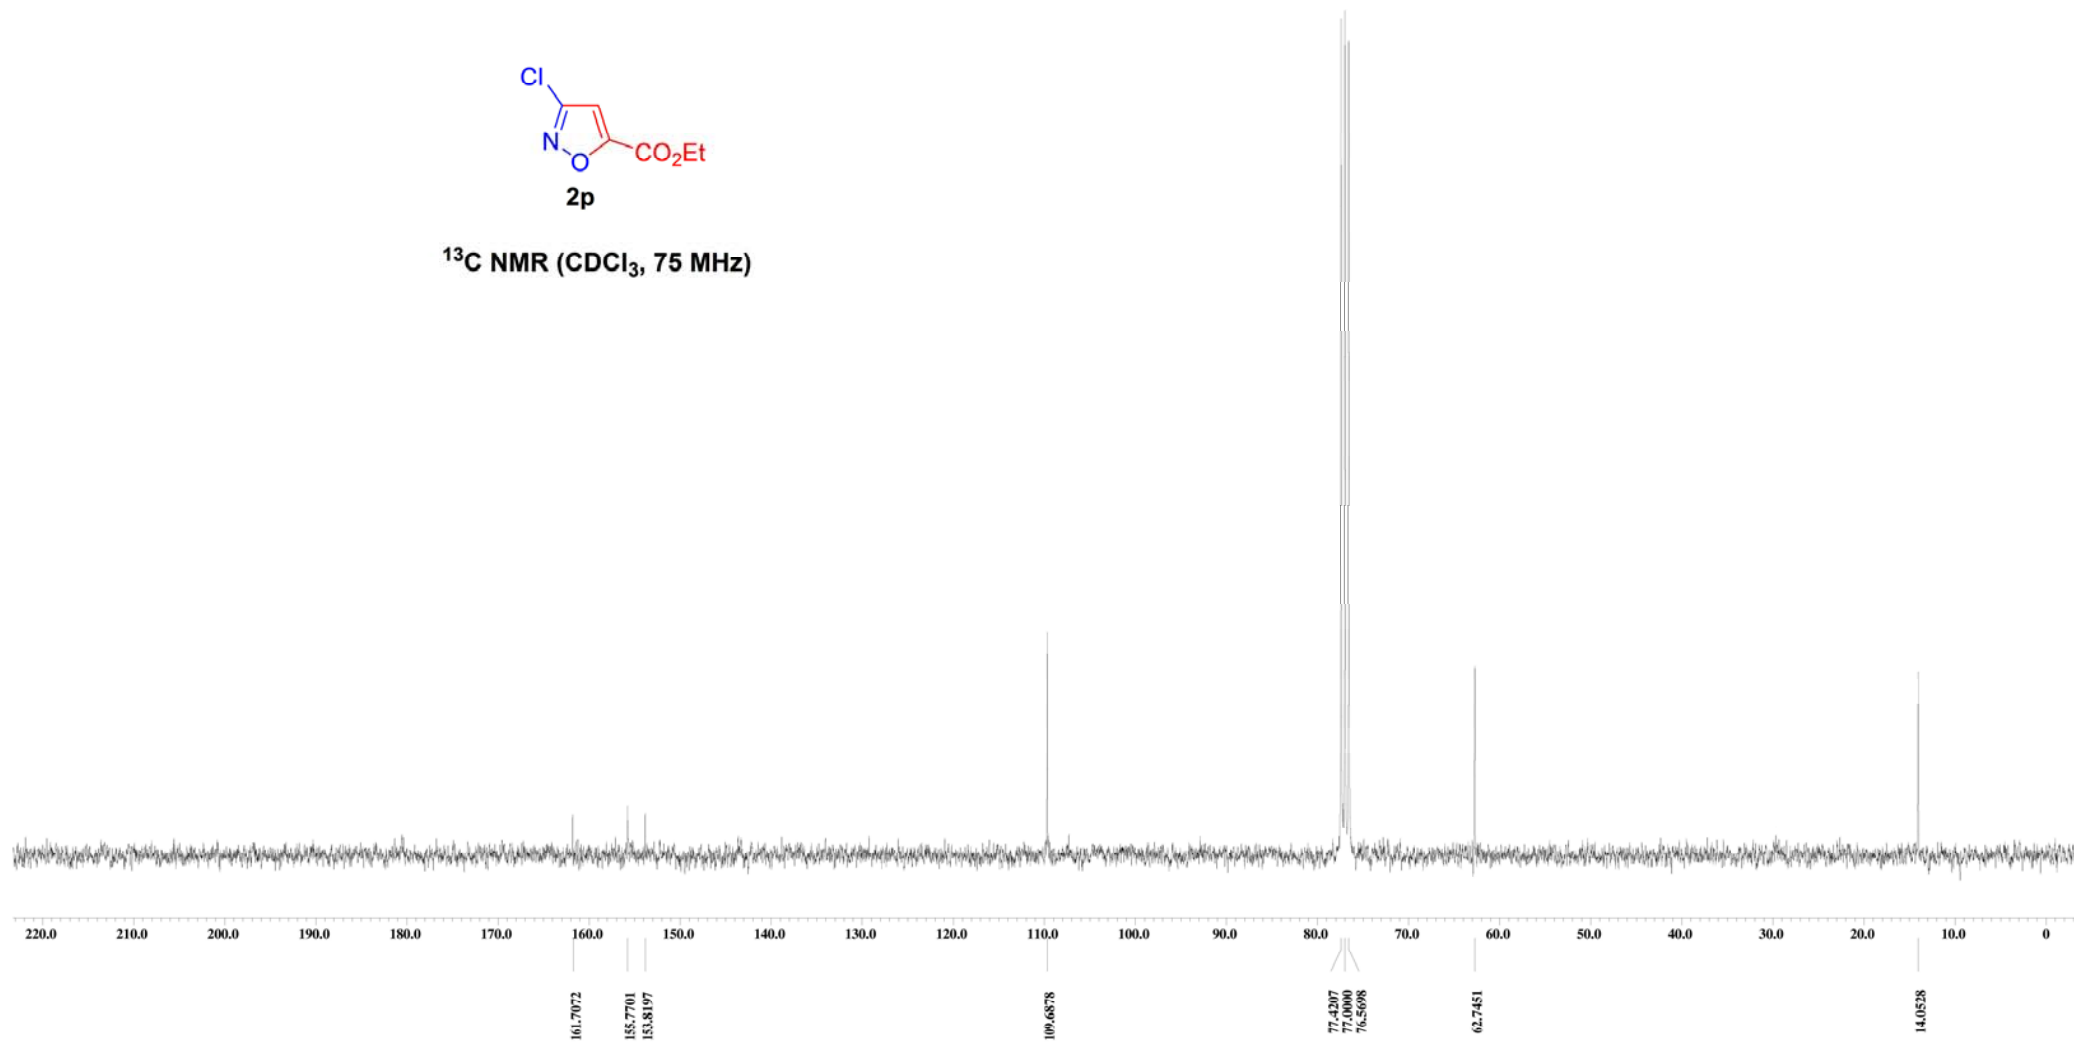

Supplement: Supplementary file 1 [file 3864334]
